# Supplementary material for: Direct air-induced arylphosphinoyl radicals for the synthesis of benzo[b]phosphole oxides
Source: Royal Society of Chemistry journal article supplement (doi:10.1039/d3gc03947a), 2023-12-04
Supplement: d3gc03947a2.pdf [file d3gc03947a2.pdf]

# Supporting Information

## Direct Air-Induced Arylphosphinoyl Radicals for Synthesis of Benzo[b]phosphole Oxides

Mingqing Huang, Haiyang Huang,\* Mengyao You, Xinxin Zhang, Longgen Sun, Chao Chen, Zhichao Mei, Ruchun Yang, Qiang Xiao,\*

Jiangxi Key Laboratory of Organic Chemistry, Institute of Organic Functional Molecules in Jiangxi Science and Technology Normal University, No. 605, fenglin road, 330013, Nanchang

**E-mail:** huanghaiyang1209@163.com (H. Huang); xiaoqiang@tsinghua.org.cn (Q. Xiao)

### Contents

|                                                                                                                |    |
|----------------------------------------------------------------------------------------------------------------|----|
| 1. The Green Metrics Analysis .....                                                                            | 2  |
| 2. Materials and Instruments.....                                                                              | 2  |
| 3. General procedure for the synthesis of compounds <b>3</b> . ....                                            | 2  |
| 4. Radical trapping experiments and the high resolution mass spectra.....                                      | 3  |
| 5. Computation of air-induced radical cyclization reaction.....                                                | 4  |
| 6. The analytical and spectral characterization data of compounds <b>3</b> . ....                              | 7  |
| 7. Copies of <sup>1</sup> H NMR, <sup>13</sup> C NMR, <sup>31</sup> P NMR Spectra of compounds <b>3</b> . .... | 21 |
| 8. X-ray crystal structures of <b>3c'</b> and <b>3j</b> . ....                                                 | 68 |
| 9. Symbolic Z-matrix of the calculated structures. ....                                                        | 74 |

## 1. The Green Metrics Analysis

**Table S1.** Evaluation of green chemistry metrics for the synthesis of Benzo[b]phosphole oxide **3a**.

|                                                                                                                  |                                                                                                |                                                        |                                                                         |              |
|------------------------------------------------------------------------------------------------------------------|------------------------------------------------------------------------------------------------|--------------------------------------------------------|-------------------------------------------------------------------------|--------------|
|                                                                                                                  |                                                                                                |                                                        |                                                                         |              |
|                                                                                                                  | <b>1a</b>                                                                                      | <b>2a</b>                                              | <b>3a</b>                                                               |              |
|                                                                                                                  | Chemical Formula: C <sub>12</sub> H <sub>11</sub> OP<br>Molecular Weight: 202.1928<br>1.4 mmol | C <sub>14</sub> H <sub>10</sub><br>178.2340<br>0.5mmol | C <sub>26</sub> H <sub>19</sub> OP<br>378.4108<br>0.41 mmol (82% yield) |              |
| Reactant 1 ( <b>1a</b> )                                                                                         | Diphenylphosphine oxide <b>1a</b>                                                              | 0.28301 g                                              | 0.0014 mol                                                              | MW: 202.1928 |
| Reactant 1 ( <b>2a</b> )                                                                                         | Diphenyl acetylene <b>2a</b>                                                                   | 0.08910 g                                              | 0.0005 mol                                                              | MW: 178.2340 |
| Solvent                                                                                                          | <i>N,N</i> -Dimethylformamide (DMF)                                                            | 0.5270 g                                               | 0.00721 mol                                                             | MW: 73.095   |
| Auxiliary                                                                                                        | Air                                                                                            | /                                                      | /                                                                       | /            |
| Product ( <b>3a</b> )                                                                                            | Benzo[b]phosphole oxide <b>3a</b>                                                              | 0.15515 g                                              | 0.00041 mol                                                             | MW: 378.4108 |
| <b>Product yield = 82%</b>                                                                                       |                                                                                                |                                                        |                                                                         |              |
| <b>E-factor</b> = $\{[(0.28301 + 0.08910 + 0.5270) - (0.15515)] / 0.15515\} = 4.8 \text{ kg waste/1 kg product}$ |                                                                                                |                                                        |                                                                         |              |
| <b>Atom economy</b> = $[378.4108 / (178.2340 + 202.1928 \times 2.8)] \times 100 \% = 50.8\%$                     |                                                                                                |                                                        |                                                                         |              |
| <b>Atom efficiency</b> = $[47 / (24 + 25 \times 2.8)] \times 82\% = 41\%$                                        |                                                                                                |                                                        |                                                                         |              |
| <b>Carbon efficiency</b> = $[26 / (14 + 12 \times 2.8)] \times 82\% = 44.8\%$                                    |                                                                                                |                                                        |                                                                         |              |
| <b>Reaction mass efficiency</b> = $[0.15515 / (0.28301 + 0.08910)] \times 100 \% = 41.7\%$                       |                                                                                                |                                                        |                                                                         |              |

## 2. Materials and Instruments.

All reactions were routinely performed under an atmosphere of air by using standard Schlenk tube and dry deoxygenated solvents. Dry DMF were purchased from J&K Scientific Ltd. Silica gel (200 - 300 mesh) purchased from Qingdao Hai Yang Chemical Industry Co. Ltd. was used for chromatographic separations. NMR spectra (400 MHz/100 MHz) were recorded on an Advance DPX spectrometer (Bruker, Billerica, MA, USA) at room temperature with Chloroform-*d* as solvent. Tetramethylsilane (TMS) was used as an internal reference. High resolution mass spectrometry (HRMS) data were measured with an AB Sciex TOF 4600 instrument (Billerica, MA, USA). Data collection for X-ray crystal analysis was performed on a Bruker Smart APEX-II single S3 crystal X-ray diffractometer using graphite monochromated Mo-K $\alpha$  radiation ( $\lambda = 0.71073 \text{ \AA}$ ) at 296 K.

## 3. General procedure for the synthesis of compounds **3**.

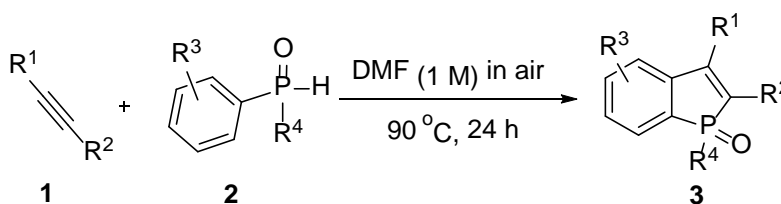

General procedure for the synthesis of compounds **3**: The Schlenk reaction tube were added alkyne **1** (0.5 mmol) and diarylphosphine oxide **2** (2.8 mmol) with an amount of air, and DMF (0.5 mL) were added to the Schlenk reaction tube by syringe. The resulting reaction mixture was kept stirring at 90 °C in oil bath for 24 h. After required reaction time the mixture was cooled down to room temperature and exteacted by ethyl acetate (20 mL) and water (20 mL) three times. The organic layer was separated, and the aqueous layer was extracted with ethyl acetate (10 mL\*2). All combined organic solutions were dried with anhydrous Na<sub>2</sub>SO<sub>4</sub> and purified by flash chromatography (PE : EA=1 : 1) to afford the corresponding product **3**.

#### 4. Radical trapping experiments and the high resolution mass spectra

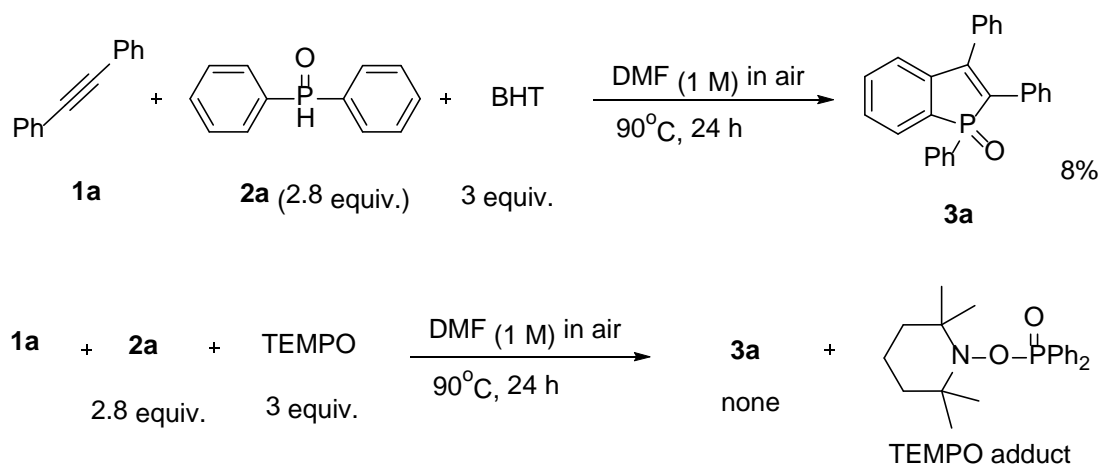

The reaction was carried out according to the general procedure, except 3 equiv of TEMPO or BHT was added. At the end of the reaction, the isolated yield revealed formation of the target product **3a** decreased dramatically. The TEMPO adduct was detected by ESI-HRMS measurement of the crude reaction mixture {HRMS (ESI): C<sub>21</sub>H<sub>29</sub>NO<sub>2</sub>P<sup>+</sup>, Calcd: 358.1930, Found: 358.1932}.

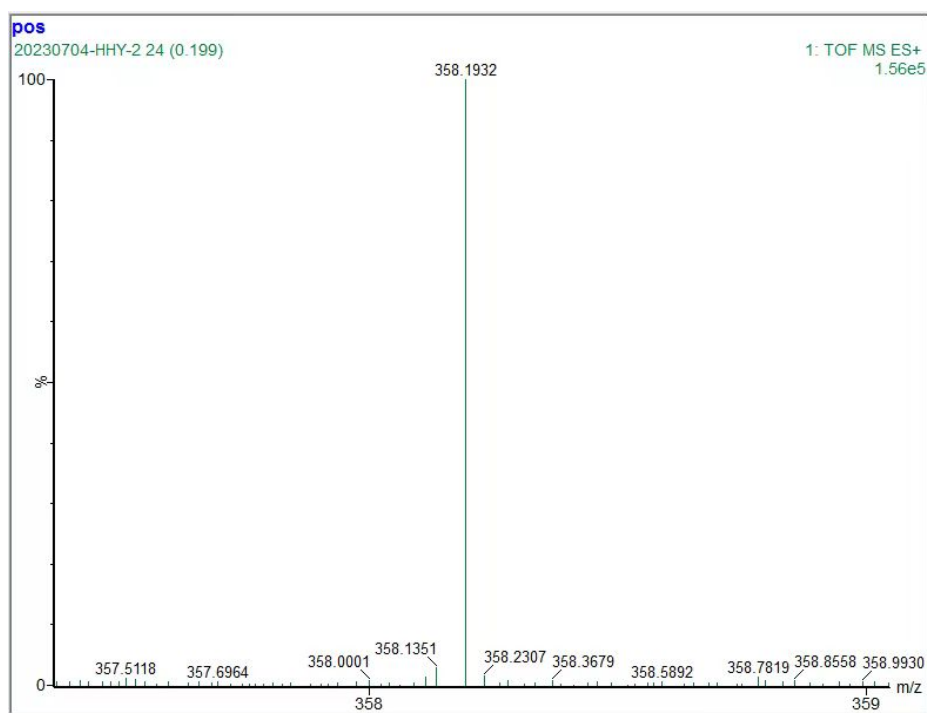

**Figure s1.** the high resolution mass spectra of the TEMPO adduct.

## 5. Computation of air-induced radical cyclization reaction.

### Computational Methods:

Density functional theory (DFT) investigations were performed to delineate the detailed mechanism of the h air(O<sub>2</sub>)-induced radical cyclization. All density functional theory calculations were carried out with the Gaussian 16 programs. The geometry optimizations of the reactants, transition states, and products were performed with the B3LYP-D3 method at the 6-31G(d,p)/SMD(DMF), and energy and frequency calculations at M06-2X-D3/def-TZVP/SMD(DMF) level. The Spin Density distribution of transition state **ts-1** along its intrinsic reaction coordinate (IRC) are performed at B3LYP/6-31+G(d, p) level. The energies given in this work are M06-2X calculated Gibbs free energies in DMF solvent.

### Animation of Reaction Coordinate (computational analysis) Move S1:

The Spin Density analysis of **ts-1**. Spin Density distribution of transition state **ts-1** along its intrinsic reaction coordinate (IRC). This video show an (P)O–H bond cleavage and new (oxygen)O–H bond formation with the spin density change. The calculated methods see supporting computational details. The video was created using Multiwfn, VMD, and Windows Movie Maker.

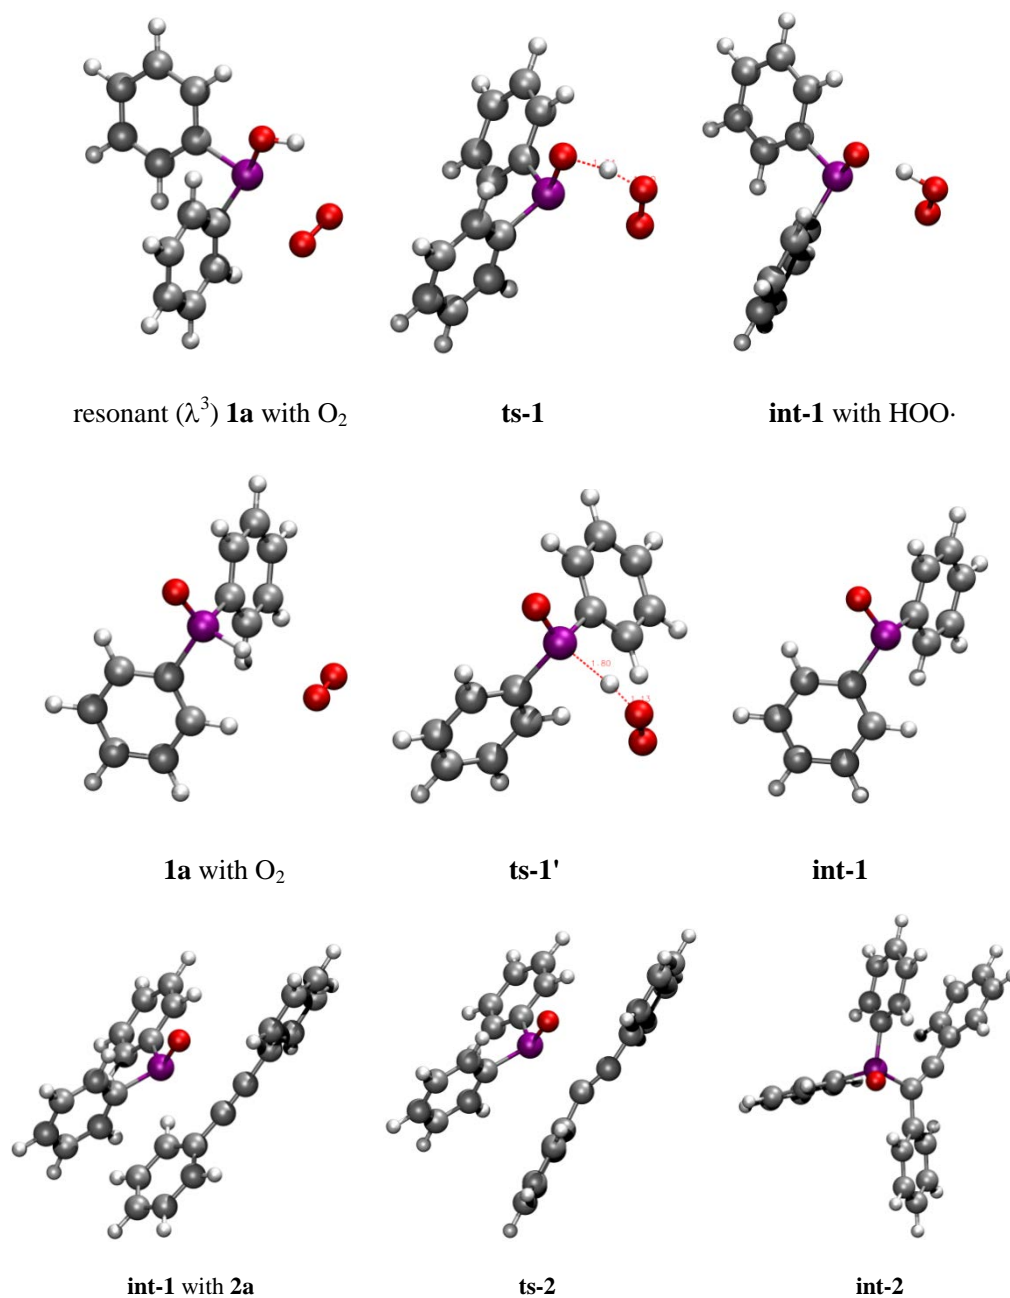

**Figure S2.** The main geometries calculated at the B3LYP-D3/6-31G(d, p) level.

**Table S2.** Thermal Free Energies with thermal correction (Hartree/Particle).

| Intermediates or transition states                     | Thermal correction to Gibbs Free Energy (B3LYP-D3/6-31G(d,p)) | Singlet point energies (M06-2X-D3/6-311G(d,p)/SMD(DMF)) | Thermal Free Energies with thermal correction |
|--------------------------------------------------------|---------------------------------------------------------------|---------------------------------------------------------|-----------------------------------------------|
| <b>1a</b> with O <sub>2</sub>                          | 0.151517                                                      | -1030.7155741                                           | -1030.564057                                  |
| resonant ( $\lambda^3$ ) <b>1a</b> with O <sub>2</sub> | 0.151149                                                      | -1030.7154199                                           | -1030.564271                                  |
| <b>int-1</b>                                           | 0.146061                                                      | -879.7631865                                            | -879.6171255                                  |
| <b>int-1</b> with HOO·                                 | 0.155288                                                      | -1030.6810103                                           | -1030.525722                                  |
| <b>int-1</b> with <b>2a</b>                            | 0.318201                                                      | -1419.1508858                                           | -1418.832685                                  |
| <b>int-2</b>                                           | 0.321384                                                      | -1419.1741091                                           | -1418.852725                                  |
| <b>3a</b>                                              | 0.318522                                                      | -1418.6499589                                           | -1418.331437                                  |
| <b>ts-1</b>                                            | 0.154063                                                      | -1030.6791832                                           | -1030.52512                                   |
| <b>ts-1'</b>                                           | 0.151149                                                      | -1030.6589971                                           | -1030.507848                                  |
| <b>ts-2</b>                                            | 0.319010                                                      | -1419.1381848                                           | -1418.819175                                  |

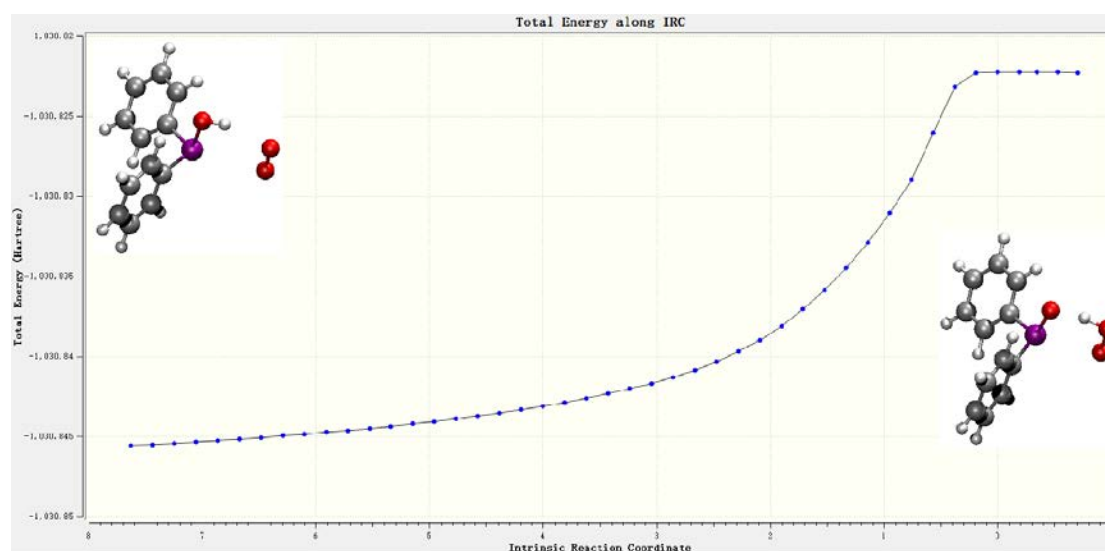

**Figure S3.** The intrinsic reaction coordinate (IRC) on **ts-1** at the B3LYP-D3/6-31G(d, p) level.

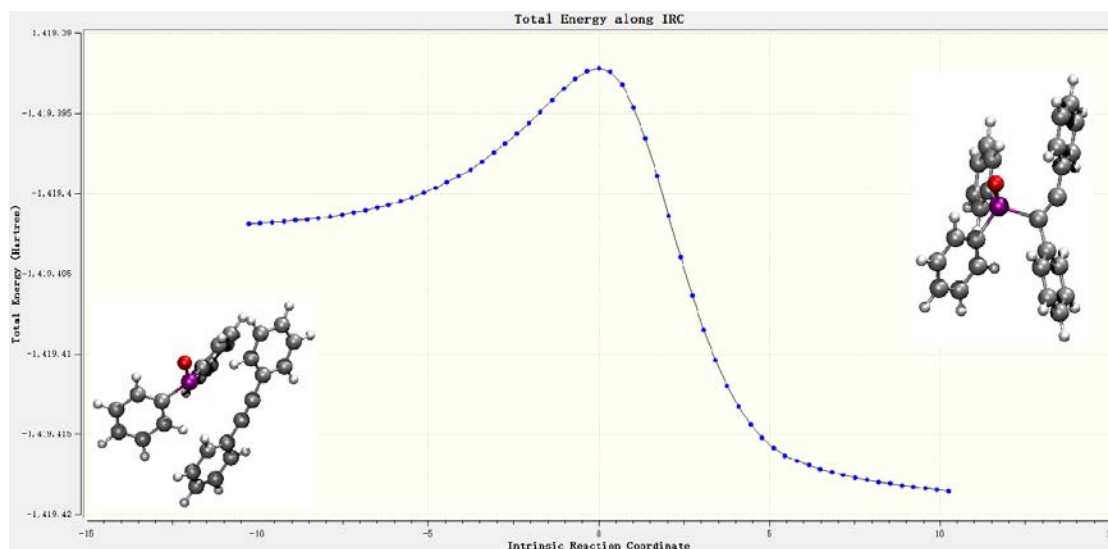

**Figure S4.** The intrinsic reaction coordinate (IRC) on **ts-2** at the B3LYP-D3/6-31G(d, p) level.

## 6. The analytical and spectral characterization data of compounds **3**.

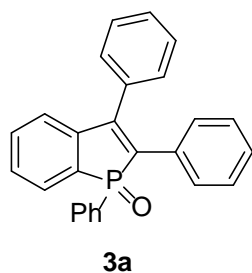

**3a:** Reaction condition as general procedure for synthesis of compounds **3a**, the white solid **3a** was afforded (yield 82%, 155.0 mg);  $^1\text{H}$  NMR (400 MHz, Chloroform-*d*)  $\delta$  7.77 (m, 2H), 7.84 – 7.83 (m, 1H), 7.53 – 7.36 (m, 8H), 7.33 (d,  $J = 7.2$  Hz, 2H), 7.26 – 7.16 (m, 3H), 7.09 (d,  $J = 5.4$  Hz, 3H);  $^{13}\text{C}$  NMR (101 MHz, Chloroform-*d*)  $\delta$  150.13 (d,  $J=21.5$  Hz, C), 143.88 (d,  $J=27.1$  Hz, C), 134.41 (d,  $J=95.7$  Hz, C), 134.37 (d,  $J=15.0$  Hz, C), 133.02 (d,  $J=2.0$  Hz, CH), 132.80 (d,  $J=9.8$  Hz, C), 132.29 (d,  $J=2.9$  Hz, CH), 132.18 (d,  $J=105.9$  Hz, C), 131.08 (d,  $J=10.6$  Hz, 2CH), 130.05 (d,  $J=99.7$  Hz, C), 129.22 (d,  $J=13.7$  Hz, CH), 129.21 (d,  $J=2.3$  Hz, 2CH), 129.15 (s, 3CH), 129.08 (s, 2CH), 129.05 (s, CH), 128.86 (d,  $J=12.2$  Hz, 2CH), 128.37 (s, 2CH), 127.95 (s, CH), 124.17 (d,  $J=10.9$  Hz, CH);  $^{31}\text{P}$  NMR (162 MHz,  $\text{CDCl}_3$ )  $\delta$  39.11; HRMS Calcd. For  $\text{C}_{26}\text{H}_{20}\text{OP}^+$  [ $\text{M} + \text{H}^+$ ] $^+$ , 379.1246. Found: 379.1239.

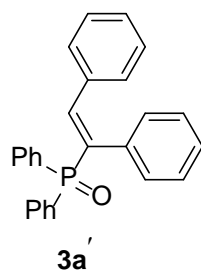

**3a':**  $^1\text{H}$  NMR (400 MHz, Chloroform-*d*)  $\delta$  7.66 (s, 1H), 7.60 – 7.55 (m, 6H), 7.30 (d,  $J=7.2$  Hz, 2H), 7.20 (d,  $J=7.2$  Hz, 2H), 7.16 – 7.11 (m, 7H), 7.06 (d,  $J=5.5$  Hz, 3H);  $^{13}\text{C}$  NMR (101 MHz,

Chloroform-*d*)  $\delta$  149.00 (d,  $J_{C-P}$ =6.9 Hz, CH), 141.47 (d,  $J_{C-P}$ =10.5 Hz, C), 136.89 (d,  $J_{C-P}$ =91.7 Hz, C), 135.40 (d,  $J_{C-P}$ =5.8 Hz, C), 134.15 (s, C), 133.12 (s, C), 131.47 (s, 2CH), 131.38 (s, 2CH), 130.92 (d,  $J_{C-P}$ =2.9 Hz, 2CH), 130.08 (d,  $J_{C-P}$ =1.4 Hz, 2CH), 128.77 (d,  $J_{C-P}$ =4.5 Hz, 2CH), 128.60 (s, CH), 128.11 (s, 2CH), 128.04 (s, 2CH), 127.86 (d,  $J_{C-P}$ =12.3 Hz, 4CH), 127.12 (s, CH);  $^{31}\text{P}$  NMR (162 MHz,  $\text{CDCl}_3$ )  $\delta$  23.94; HRMS Calcd. For  $\text{C}_{26}\text{H}_{22}\text{OP}^+ [\text{M} + \text{H}^+]^+$ , 381.1403. Found: 381.1403.

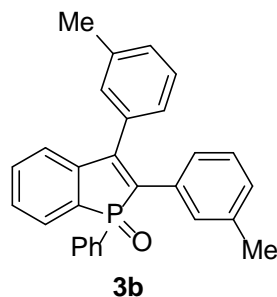

**3b:** Reaction condition as general procedure for synthesis of compounds **3a**, the white solid **3b** was afforded (yield 70%, 142.2 mg);  $^1\text{H}$  NMR (400 MHz, Chloroform-*d*)  $\delta$  7.83 – 7.74 (m, 2H), 7.77 – 7.68 (m, 1H), 7.50 – 7.42 (m, 2H), 7.36 – 7.29 (m, 3H), 7.32 (d,  $J$  = 7.7 Hz, 1H), 7.23 – 7.18 (m, 2H), 7.14 (s, 1H), 7.10 (d,  $J$  = 6.6 Hz, 1H), 7.06 – 6.83 (m, 4H), 2.36 (s, 3H), 2.12 (s, 3H);  $^{13}\text{C}$  NMR (101 MHz, Chloroform-*d*)  $\delta$  150.15 (d,  $J_{C-P}$  = 21.4 Hz, C), 144.08 (d,  $J_{C-P}$  = 27.1 Hz, C), 138.69 (s, C), 137.77 (s, C), 134.48 (d,  $J_{C-P}$  = 15.1 Hz, C), 134.15 (d,  $J_{C-P}$  = 95.8 Hz, C), 132.94 (d,  $J_{C-P}$  = 2.0 Hz, CH), 132.76 (d,  $J_{C-P}$  = 2.9 Hz, C), 132.19 (d,  $J_{C-P}$  = 2.9 Hz, CH), 132.19 (d,  $J_{C-P}$  = 98.8 Hz, C), 131.09 (d,  $J_{C-P}$  = 10.5 Hz, 2CH), 130.32 (d,  $J_{C-P}$  = 99.4 Hz, C), 129.74 (d,  $J_{C-P}$  = 5.6 Hz, CH), 129.46 (d,  $J_{C-P}$  = 2.4 Hz, 2CH), 129.09 (d,  $J$  = 10.6 Hz, CH), 129.05 (d,  $J$  = 10.2 Hz, CH), 129.00 (s, CH), 128.94 (s, CH), 128.87 (s, CH), 128.75 (s, CH), 128.12 (s, CH), 126.34 (d,  $J_{C-P}$  = 5.9 Hz, CH), 126.22 (s, CH), 124.16 (d,  $J_{C-P}$  = 10.8 Hz, CH), 21.60 (s,  $\text{CH}_3$ ), 21.46 (s,  $\text{CH}_3$ );  $^{31}\text{P}$  NMR (162 MHz,  $\text{CDCl}_3$ )  $\delta$  39.13; HRMS Calcd. For  $\text{C}_{28}\text{H}_{24}\text{OP}^+ [\text{M} + \text{H}^+]^+$ , 407.1559. Found: 407.1559.

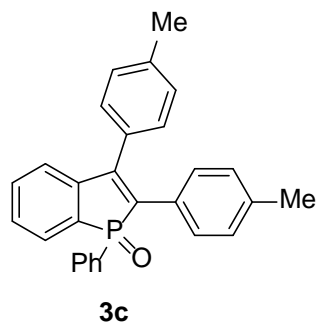

**3c:** Reaction condition as general procedure for synthesis of compounds **3a**, the white solid **3c** was afforded (yield 73%, 148.2 mg);  $^1\text{H}$  NMR (400 MHz, Chloroform-*d*)  $\delta$  7.88 – 7.71 (m, 2H), 7.71 – 7.65 (m, 1H), 7.47 – 7.41 (m, 5H), 7.27 – 7.18 (m, 5H), 7.15 (d,  $J$  = 7.9 Hz, 2H), 6.90 (d,  $J$  = 7.9 Hz, 2H), 2.40 (s, 3H), 2.19 (s, 3H);  $^{13}\text{C}$  NMR (101 MHz, Chloroform-*d*)  $\delta$  149.50 (d,  $J_{C-P}$  = 21.6 Hz, C), 144.17 (d,  $J_{C-P}$  = 27.2 Hz, C), 138.59 (s, C), 137.76 (s, C), 133.84 (d,  $J_{C-P}$  = 95.7 Hz, C), 132.90 (d,  $J_{C-P}$  = 2.1 Hz, CH), 132.20 (d,  $J_{C-P}$  = 105.6 Hz, C), 132.15 (d,  $J_{C-P}$  = 2.9 Hz, CH), 131.52 (d,  $J_{C-P}$  = 15.2 Hz, C), 131.06 (d,  $J_{C-P}$  = 10.6 Hz, 2CH), 130.42 (d,  $J_{C-P}$  = 79.9 Hz, C), 129.88 (d,  $J_{C-P}$  = 9.4 Hz, C), 129.78 (s, 2CH), 129.11 (s, 2CH), 129.04 (s, 3CH), 128.98 (d,  $J_{C-P}$  = 2.2 Hz, 2CH), 128.97 (s, CH), 128.93 (d,  $J_{C-P}$  = 1.6 Hz, CH), 128.85 (s, CH), 124.01 (d,  $J_{C-P}$  = 10.9 Hz, CH), 21.53 (s,  $\text{CH}_3$ ), 21.32 (s,  $\text{CH}_3$ );  $^{31}\text{P}$  NMR (162 MHz,  $\text{CDCl}_3$ )  $\delta$  39.17; HRMS Calcd. For  $\text{C}_{28}\text{H}_{24}\text{OP}^+ [\text{M} + \text{H}^+]^+$ , 407.1559. Found: 407.1548.



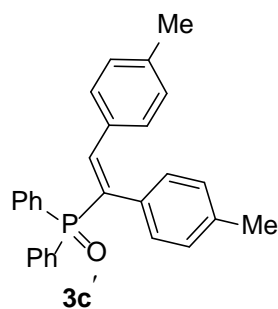

**3c'**:  $^1\text{H}$  NMR (400 MHz, Chloroform-*d*)  $\delta$  7.53 (dd,  $J=11.6, 7.9$  Hz, 4H), 7.38 – 7.30 (m, 4H), 7.27 – 7.21 (m, 4H), 6.85 – 6.82 (m, 2H), 6.78 (d,  $J=2.5$  Hz, 3H), 6.68 (d,  $J=7.6$  Hz, 2H), 2.12 (s, 3H), 2.08 (s, 3H);  $^{13}\text{C}$  NMR (101 MHz, Chloroform-*d*)  $\delta$  142.27 (d,  $J_{\text{C-P}}=10.5$  Hz, CH), 138.19 (s, C), 136.50 (d,  $J_{\text{C-P}}=2.5$  Hz, C), 132.76 (d,  $J_{\text{C-P}}=95.7$  Hz, C), 131.40 (d,  $J_{\text{C-P}}=9.5$  Hz, 4CH), 131.19 (d,  $J_{\text{C-P}}=18.1$  Hz, C), 130.85 (d,  $J_{\text{C-P}}=2.8$  Hz, 2CH), 130.84 (s, C), 129.98 (d,  $J_{\text{C-P}}=103.5$  Hz, 2C), 129.32 (s, 2CH), 128.90 (d,  $J_{\text{C-P}}=4.4$  Hz, 2CH), 128.53 (d,  $J_{\text{C-P}}=1.8$  Hz, 2CH), 127.95 (s, 2CH), 127.29 (d,  $J_{\text{C-P}}=12.0$  Hz, 4CH), 20.28 (s,  $\text{CH}_3$ ), 20.27 (s,  $\text{CH}_3$ );  $^{31}\text{P}$  NMR (162 MHz,  $\text{CDCl}_3$ )  $\delta$  29.92; HRMS Calcd. For  $\text{C}_{28}\text{H}_{26}\text{OP}^+ [\text{M} + \text{H}]^+$ , 409.1716. Found: 409.1720.

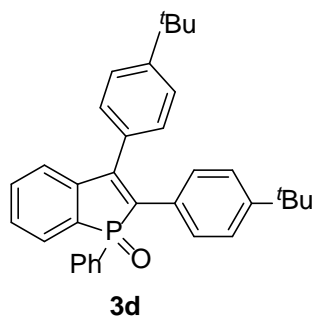

**3d**: Reaction condition as general procedure for synthesis of compounds **3a**, the yellow solid **3d** was afforded (yield 79%, 193.7 mg);  $^1\text{H}$  NMR (400 MHz, Chloroform-*d*)  $\delta$  7.87 – 7.75 (m, 2H), 7.69 – 7.63 (m, 1H), 7.53 – 7.44 (m, 3H), 7.44 – 7.35 (m, 3H), 7.34 – 7.30 (m, 1H), 7.29 – 7.25 (m, 2H), 7.18 (dd,  $J = 7.6, 2.8$  Hz, 1H), 7.15 (d,  $J = 8.3$  Hz, 2H), 7.08 (d,  $J = 8.5$  Hz, 2H), 1.38 (s, 9H), 1.19 (s, 9H);  $^{13}\text{C}$  NMR (101 MHz, Chloroform-*d*)  $\delta$  151.85 (s, C), 150.85 (s, C), 149.43 (d,  $J_{\text{C-P}}=21.5$  Hz, C), 144.37 (d,  $J_{\text{C-P}}=27.2$  Hz, C), 133.69 (d,  $J_{\text{C-P}}=96.1$  Hz, C), 132.90 (d,  $J_{\text{C-P}}=2.2$  Hz, CH), 132.28 (d,  $J=126.3$  Hz, C), 132.13 (d,  $J=2.9$  Hz, CH), 131.81 (s, C), 131.13 (d,  $J=10.6$  Hz, 2CH), 130.79 (d,  $J=98.7$  Hz, C), 129.84 (d,  $J_{\text{C-P}}=10.1$  Hz, C), 129.05 (s, CH), 128.98 (s, CH), 128.89 (s, 2CH), 128.88 (d,  $J_{\text{C-P}}=9.2$  Hz, 2CH), 128.81 (s, 2CH), 126.00 (s, 2CH), 125.31 (s, 2CH), 124.13 (d,  $J_{\text{C-P}}=11.0$  Hz, CH), 34.92 (s, C), 34.64 (s, C), 31.48 (s,  $3\text{CH}_3$ ), 31.24 (s,  $3\text{CH}_3$ );  $^{31}\text{P}$  NMR (162 MHz,  $\text{CDCl}_3$ )  $\delta$  39.18; HRMS Calcd. For  $\text{C}_{34}\text{H}_{36}\text{OP}^+ [\text{M} + \text{H}]^+$ , 491.2498. Found: 491.2495.

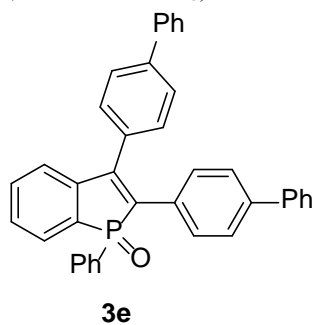

**3e**: Reaction condition as general procedure for synthesis of compounds **3a**, the white solid **3e** was

afforded (yield 75%, 198.8 mg);  $^1\text{H}$  NMR (400 MHz, Chloroform-*d*)  $\delta$  7.86 – 7.80 (m, 2H), 7.78 – 7.64 (m, 6H), 7.64 – 7.58 (m, 1H), 7.50 – 7.47 (m, 5H), 7.46 – 7.44 (m, 2H), 7.43 – 7.40 (m, 2H), 7.37 (s, 7H), 7.32 – 7.28 (m, 2H);  $^{13}\text{C}$  NMR (101 MHz, Chloroform-*d*)  $\delta$  149.69 (d,  $J_{\text{C-P}} = 21.4$  Hz, C), 143.95 (d,  $J_{\text{C-P}} = 27.0$  Hz, C), 141.62 (s, C), 140.55 (s, C), 140.44 (s, C), 140.38 (s, C), 134.13 (d,  $J_{\text{C-P}} = 95.3$  Hz, C), 133.44 (d,  $J_{\text{C-P}} = 15.0$  Hz, C), 133.11 (d,  $J_{\text{C-P}} = 1.6$  Hz, CH), 132.63 (d,  $J_{\text{C-P}} = 90.4$  Hz, C), 132.36 (d,  $J_{\text{C-P}} = 2.9$  Hz, CH), 132.01 (d,  $J_{\text{C-P}} = 33.6$  Hz, C), 131.26 (d,  $J_{\text{C-P}} = 106.8$  Hz, C), 131.21 (s, CH), 131.11 (s, CH), 129.74 (s, 2CH), 129.63 (d,  $J = 5.9$  Hz, 2CH), 129.33 (d,  $J_{\text{C-P}} = 4.6$  Hz, CH), 129.23 (d,  $J_{\text{C-P}} = 3.7$  Hz, CH), 129.13 (s, CH), 129.06 (s, 2CH), 129.01 (s, CH), 128.84 (s, 2CH), 127.80 (s, 2CH), 127.71 (d,  $J_{\text{C-P}} = 35.2$  Hz, 2CH), 127.19 (s, 2CH), 127.08 (s, 2CH), 126.99 (s, 2CH), 124.21 (d,  $J_{\text{C-P}} = 10.7$  Hz, CH);  $^{31}\text{P}$  NMR (162 MHz,  $\text{CDCl}_3$ )  $\delta$  39.15; HRMS Calcd. For  $\text{C}_{38}\text{H}_{28}\text{OP}^+ [\text{M} + \text{H}^+]^+$ , 531.1872. Found: 531.1880.

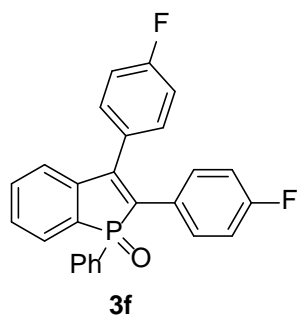

**3f:** Reaction condition as general procedure for synthesis of compounds **3a**, the yellow solid **3f** was afforded (yield 55%, 113.9 mg);  $^1\text{H}$  NMR (400 MHz, Chloroform-*d*)  $\delta$  7.76 – 7.70 (m, 3H), 7.48 (t,  $J = 6.7$  Hz, 2H), 7.42 – 7.37 (m, 3H), 7.31 – 7.28 (m, 2H), 7.20 (t,  $J = 6.6$  Hz, 3H), 7.14 (t,  $J = 8.4$  Hz, 2H), 6.81 (t,  $J = 8.5$  Hz, 2H);  $^{13}\text{C}$  NMR (101 MHz, Chloroform-*d*)  $\delta$  163.01 (d,  $J_{\text{C-F}} = 249.3$  Hz, C), 162.45 (d,  $J_{\text{C-F}} = 249.1$  Hz, C), 148.99 (d,  $J_{\text{C-F}} = 22.1$  Hz, C), 143.64 (d,  $J = 26.8$  Hz, C), 134.08 (d,  $J_{\text{C-P}} = 96.2$  Hz, C), 133.22 (d,  $J = 2.0$  Hz, CH), 132.52 (d,  $J = 2.9$  Hz, CH), 131.92 (d,  $J_{\text{C-P}} = 106.0$  Hz, C), 131.14 (d,  $J = 8.2$  Hz, 2CH), 131.07 (d,  $J = 10.6$  Hz, 2CH), 130.98 (dd,  $J = 8.2, 5.5$  Hz, 2CH), 130.67 (d,  $J = 103.2$  Hz, C), 130.00 (dd,  $J = 15.3, 3.7$  Hz, C), 129.46 (d,  $J = 17.1$  Hz, CH), 129.46 (d,  $J = 3.3$  Hz, CH), 129.10 (d,  $J = 12.3$  Hz, 2CH), 128.72 (dd,  $J = 10.1, 3.4$  Hz, C), 124.01 (d,  $J = 10.9$  Hz, CH), 116.46 (d,  $J = 21.6$  Hz, 2CH), 115.70 (d,  $J = 21.6$  Hz, 2CH);  $^{31}\text{P}$  NMR (162 MHz,  $\text{CDCl}_3$ )  $\delta$  38.81; HRMS Calcd. For  $\text{C}_{26}\text{H}_{18}\text{F}_2\text{OP}^+ [\text{M} + \text{H}^+]^+$ , 415.1058. Found: 415.1057.

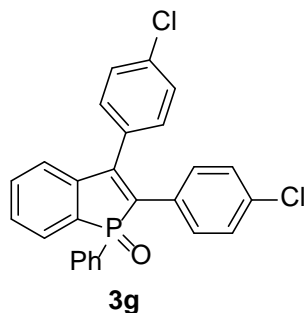

**3g:** Reaction condition as general procedure for synthesis of compounds **3a**, the white solid **3g** was afforded (56%, 124.9 mg);  $^1\text{H}$  NMR (400 MHz, Chloroform-*d*)  $\delta$  7.74 – 7.69 (m, 3H), 7.49 (q,  $J = 7.1$  Hz, 2H), 7.44 – 7.40 (m, 5H), 7.28 – 7.24 (m, 2H), 7.22 – 7.13 (m, 3H), 7.09 (d,  $J = 8.3$  Hz, 2H);  $^{13}\text{C}$  NMR (101 MHz, Chloroform-*d*)  $\delta$  149.19 (d,  $J_{\text{C-P}} = 21.7$  Hz, C), 143.29 (d,  $J_{\text{C-P}} = 26.5$  Hz, C), 135.11 (s, C), 134.21 (s, 2C), 134.05 (d,  $J_{\text{C-P}} = 95.6$  Hz, C), 133.26 (d,  $J_{\text{C-P}} = 2.0$  Hz, 2CH), 132.59 (d,  $J_{\text{C-P}} = 2.9$  Hz, CH), 132.39 (d,  $J_{\text{C-P}} = 15.0$  Hz, C), 131.91 (d,  $J_{\text{C-P}} = 106.0$  Hz, C), 131.04 (d,  $J_{\text{C-P}} = 10.8$  Hz, 2CH),

130.57 (s, 2CH), 130.35 (d,  $J_{C-P}$  = 5.5 Hz, 2CH), 129.65 (d,  $J_{C-P}$  = 10.7 Hz, CH), 129.63 (s, 2CH), 129.48 (d,  $J_{C-P}$  = 9.8 Hz, CH), 129.39 (d,  $J_{C-P}$  = 99.8 Hz, C), 129.13 (d,  $J_{C-P}$  = 12.4 Hz, 2CH), 128.89 (s, CH), 124.06 (d,  $J_{C-P}$  = 10.6 Hz, CH);  $^{31}\text{P}$  NMR (162 MHz,  $\text{CDCl}_3$ )  $\delta$  38.92; HRMS Calcd. For  $\text{C}_{26}\text{H}_{18}\text{Cl}_2\text{OP}^+ [\text{M} + \text{H}^+]^+$ , 447.0467. Found: 447.0462.

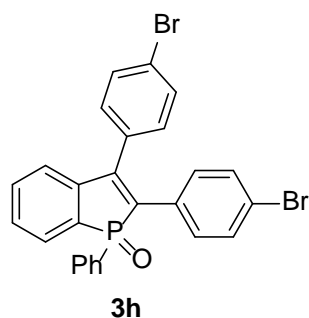

**3h:** Reaction condition as general procedure for synthesis of compounds **3a**, the yellow solid **3h** was afforded (yield 62%, 165.5 mg);  $^1\text{H}$  NMR (400 MHz, Chloroform-*d*)  $\delta$  7.76 – 7.67(m, 3H), 7.58 (d,  $J$  = 8.0 Hz, 2H), 7.49 (q,  $J$  = 7.0 Hz, 2H), 7.42 – 7.36 (m, 3H), 7.25 (d,  $J$  = 8.0 Hz, 2H), 7.19 (d,  $J$  = 7.9 Hz, 3H), 7.10 (d,  $J$  = 8.2 Hz, 2H);  $^{13}\text{C}$  NMR (101 MHz, Chloroform-*d*)  $\delta$  149.22 (d,  $J_{C-P}$  = 21.7 Hz, C), 143.23 (d,  $J_{C-P}$  = 26.5 Hz, C), 134.17 (d,  $J_{C-P}$  = 95.3 Hz, C), 133.26 (d,  $J_{C-P}$  = 1.9 Hz, CH), 132.89 (d,  $J_{C-P}$  = 14.9 Hz, C), 132.59 (d,  $J_{C-P}$  = 2.9 Hz, 3CH), 132.02 (d,  $J_{C-P}$  = 90.8 Hz, C), 131.84 (s, 2CH), 131.44 (d,  $J_{C-P}$  = 5.3 Hz, C), 131.09 (s, CH), 130.98 (s, CH), 130.80 (s, 2CH), 130.60 (d,  $J_{C-P}$  = 5.5 Hz, 2CH), 129.67 (d,  $J_{C-P}$  = 10.7 Hz, CH), 129.48 (d,  $J_{C-P}$  = 9.7 Hz, CH), 129.40 (d,  $J_{C-P}$  = 100.5 Hz, C), 129.13 (d,  $J_{C-P}$  = 12.4 Hz, 2CH), 124.07 (d,  $J_{C-P}$  = 10.8 Hz, CH), 123.33 (s, C), 122.59 (s, C);  $^{31}\text{P}$  NMR (162 MHz,  $\text{CDCl}_3$ )  $\delta$  38.78; HRMS Calcd. For  $\text{C}_{26}\text{H}_{18}\text{Br}_2\text{OP}^+ [\text{M} + \text{H}^+]^+$ , 536.9436. Found: 536.9430.

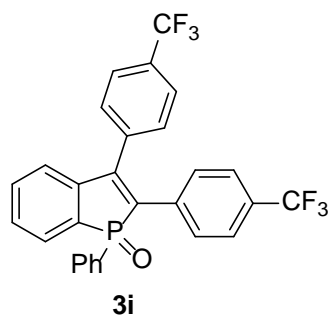

**3i:** Reaction condition as general procedure for synthesis of compounds **3a**, the yellow solid **3i** was afforded (yield 48%, 123.4 mg);  $^1\text{H}$  NMR (400 MHz, Chloroform-*d*)  $\delta$  7.80 – 7.69 (m, 4H), 7.60 – 7.49 (m, 2H), 7.45 (t,  $J$  = 7.2 Hz, 3H), 7.40 (d,  $J$  = 7.6 Hz, 1H), 7.37 (s, 1H), 7.31 (d,  $J$  = 8.2 Hz, 2H), 7.26 (s, 1H), 7.17 (dd,  $J$  = 7.6, 3.0 Hz, 1H);  $^{13}\text{C}$  NMR (101 MHz, Chloroform-*d*)  $\delta$  150.03 (d,  $J_{C-P}$  = 21.6 Hz, C), 142.91 (d,  $J_{C-P}$  = 26.1 Hz, C), 137.64 (d,  $J_{C-P}$  = 14.6 Hz, C), 136.09 (d,  $J_{C-P}$  = 9.8 Hz, C), 134.86 (d,  $J_{C-P}$  = 94.6 Hz, C), 133.44 (d,  $J_{C-P}$  = 2.0 Hz, CH), 132.81 (d,  $J_{C-P}$  = 3.0 Hz, CH), 131.96 (d,  $J_{C-P}$  = 106.4 Hz, C), 131.37 (d,  $J_{C-F}$  = 33.0 Hz, C), 131.07 (d,  $J_{C-P}$  = 10.7 Hz, 2CH), 130.2 (d,  $J_{C-F}$  = 33.0 Hz, C), 130.10 (d,  $J_{C-P}$  = 10.8 Hz, CH), 129.71 (d,  $J_{C-P}$  = 9.6 Hz, CH), 129.64(s,2CH),129.32 (s, 2CH), 129.23 (d,  $J_{C-P}$  = 7.8 Hz, 2CH), 129.04 (d,  $J_{C-P}$  = 100.8 Hz, C), 126.35 (d,  $J_{C-P}$  = 3.8 Hz, 2CH), 125.61 (dd,  $J_{C-P}$  = 7.7, 3.9 Hz, 2CH), 124.30 (d,  $J_{C-P}$  = 10.8 Hz, CH), 123.96 (q,  $J_{C-F}$  = 273.2 Hz, C), 123.94 (q,  $J_{C-F}$  = 273.1 Hz, C);  $^{31}\text{P}$  NMR (162 MHz,  $\text{CDCl}_3$ )  $\delta$  38.89; HRMS Calcd. For  $\text{C}_{28}\text{H}_{18}\text{F}_6\text{OP}^+ [\text{M} + \text{H}^+]^+$ , 515.0994. Found: 515.0997.

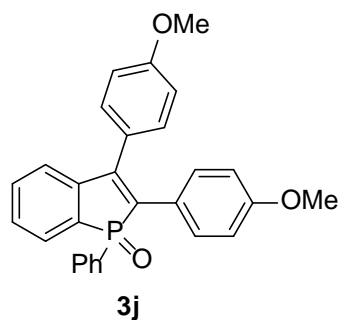

**3j:** Reaction condition as general procedure for synthesis of compounds **3a**, the yellow solid **3j** was afforded (yield 80%, 175.3 mg);  $^1\text{H}$  NMR (400 MHz, Chloroform-*d*)  $\delta$  7.77 – 7.68 (m, 2H), 7.66 – 7.61 (m, 1H), 7.50 – 7.42 (m, 2H), 7.36 – 7.29 (m, 3H), 7.32 (d,  $J = 7.7$  Hz, 1H), 7.23 – 7.18 (m, 2H), 7.14 (s, 1H), 7.10 (d,  $J = 6.6$  Hz, 1H), 7.06 – 6.83 (m, 4H), 2.36 (s, 3H), 2.12 (s, 3H);  $^{13}\text{C}$  NMR (101 MHz, Chloroform-*d*)  $\delta$  159.85 (s, C), 159.15 (s, C), 148.24 (d,  $J_{\text{C-P}} = 22.2$  Hz, C), 144.32 (d,  $J_{\text{C-P}} = 27.4$  Hz, C), 133.20 (d,  $J_{\text{C-P}} = 96.2$  Hz, C), 132.92 (s, CH), 132.16 (d,  $J_{\text{C-P}} = 2.9$  Hz, CH), 132.09 (d,  $J_{\text{C-P}} = 106.3$  Hz, C), 131.06 (d,  $J_{\text{C-P}} = 10.6$  Hz, 2CH), 130.59 (s, CH), 130.54 (d,  $J_{\text{C-P}} = 6.0$  Hz, 2CH), 130.42 (d,  $J_{\text{C-P}} = 99.5$  Hz, C), 128.99 (s, CH), 128.92 (d,  $J = 11.8$  Hz, CH), 128.92 (d,  $J = 30.1$  Hz, CH), 128.88 (s, CH), 126.65 (d,  $J_{\text{C-P}} = 15.3$  Hz, C), 125.42 (d,  $J_{\text{C-P}} = 10.4$  Hz, C), 123.81 (d,  $J_{\text{C-P}} = 10.9$  Hz, 2CH), 114.59 (s, 2CH), 113.90 (s, 2CH), 55.41 (s,  $\text{CH}_3$ ), 55.19 (s,  $\text{CH}_3$ );  $^{31}\text{P}$  NMR (162 MHz,  $\text{CDCl}_3$ )  $\delta$  39.15; HRMS Calcd. For  $\text{C}_{28}\text{H}_{24}\text{O}_3\text{P}^+ [\text{M} + \text{H}^+]^+$ , 439.1458. Found: 439.1459.

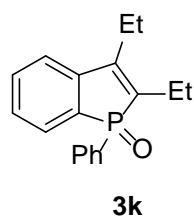

**3k:** Reaction condition as general procedure for synthesis of compounds **3a**, the white solid **3k** was afforded (yield 57%, 80.4 mg);  $^1\text{H}$  NMR (400 MHz, Chloroform-*d*)  $\delta$  7.60 – 7.52 (m, 2H), 7.48 – 7.43 (m, 1H), 7.42 – 7.37 (m, 2H), 7.32 – 7.26 (m, 3H), 7.20 – 7.15 (m, 1H), 2.52 (t,  $J = 7.8$  Hz, 2H), 2.48 – 2.35 (m, 1H), 2.24 – 2.14 (m, 1H), 1.55 – 1.46 (m, 2H), 1.43 – 1.36 (m, 2H), 1.34 – 1.23 (m, 2H), 1.19 – 1.12 (m, 2H), 0.90 (t,  $J = 7.2$  Hz, 3H), 0.69 (t,  $J = 7.2$  Hz, 3H);  $^{13}\text{C}$  NMR (101 MHz, Chloroform-*d*)  $\delta$  151.59 (d,  $J_{\text{C-P}} = 19.8$  Hz, C), 143.31 (d,  $J_{\text{C-P}} = 29.1$  Hz, C), 135.26 (d,  $J_{\text{C-P}} = 96.5$  Hz, C), 132.87 (d,  $J_{\text{C-P}} = 2.1$  Hz, CH), 132.39 (d,  $J_{\text{C-P}} = 105.2$  Hz, C), 131.94 (d,  $J_{\text{C-P}} = 2.8$  Hz, CH), 130.99 (d,  $J_{\text{C-P}} = 10.6$  Hz, 2CH), 130.35 (d,  $J_{\text{C-P}} = 96.8$  Hz, C), 128.75 (d,  $J_{\text{C-P}} = 12.0$  Hz, 2CH), 128.68 (d,  $J_{\text{C-P}} = 9.7$  Hz, CH), 128.31 (d,  $J_{\text{C-P}} = 10.6$  Hz, CH), 121.29 (d,  $J_{\text{C-P}} = 11.3$  Hz, CH), 19.66 (d,  $J_{\text{C-P}} = 13.6$  Hz,  $\text{CH}_2$ ), 19.06 (d,  $J_{\text{C-P}} = 11.0$  Hz,  $\text{CH}_2$ ), 14.00 (d,  $J_{\text{C-P}} = 2.1$  Hz,  $\text{CH}_3$ ), 13.17 (d,  $J_{\text{C-P}} = 2.2$  Hz,  $\text{CH}_3$ );  $^{31}\text{P}$  NMR (162 MHz,  $\text{CDCl}_3$ )  $\delta$  39.66; HRMS Calcd. For  $\text{C}_{18}\text{H}_{20}\text{OP}^+ [\text{M} + \text{H}^+]^+$ , 283.1246. Found: 283.1241.

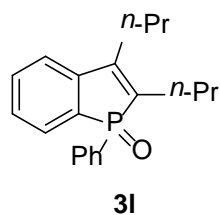

**3l:** Reaction condition as general procedure for synthesis of compounds **3a**, the white solid **3l** was afforded (yield 67%, 103.9 mg);  $^1\text{H}$  NMR (400 MHz, Chloroform-*d*)  $\delta$  7.83 – 7.58 (m, 2H), 7.55 (dd,  $J$

= 9.8, 7.2 Hz, 1H), 7.52 – 7.42 (m, 2H), 7.41 – 7.34(m, 3H), 7.29 – 7.24 (m, 1H), 2.59 (t,  $J = 7.8$  Hz, 2H), 2.5 – 2.4 (m, 1H), 2.30 – 2.20 (m, 1H), 1.68 – 1.59(m, 2H), 1.46 – 1.36 (m, 2H), 1.04 (t,  $J = 7.4$  Hz, 3H), 0.83 (t,  $J = 7.3$  Hz, 3H);  $^{13}\text{C}$  NMR (101 MHz, Chloroform-*d*)  $\delta$  150.95 (d,  $J_{\text{C-P}} = 20.2$  Hz, C), 143.65 (d,  $J_{\text{C-P}} = 29.5$  Hz, C), 134.23 (d,  $J_{\text{C-P}} = 96.6$  Hz, C), 133.07 (d,  $J_{\text{C-P}} = 2.1$  Hz, CH), 132.17 (d,  $J_{\text{C-P}} = 2.9$  Hz, CH), 131.79 (d,  $J_{\text{C-P}} = 105.9$  Hz, C), 131.01 (d,  $J_{\text{C-P}} = 10.7$  Hz, 2CH), 129.73 (d,  $J_{\text{C-P}} = 97.8$  Hz, C), 128.89 (d,  $J_{\text{C-P}} = 12.3$  Hz, 2CH), 128.81 (d,  $J_{\text{C-P}} = 9.7$  Hz, CH), 128.48 (d,  $J_{\text{C-P}} = 10.5$  Hz, CH), 121.57 (d,  $J_{\text{C-P}} = 11.4$  Hz, CH), 28.67 (d,  $J_{\text{C-P}} = 13.4$  Hz,  $\text{CH}_2$ ), 28.30 (d,  $J_{\text{C-P}} = 10.8$  Hz,  $\text{CH}_2$ ), 22.37 (d,  $J_{\text{C-P}} = 1.9$  Hz,  $\text{CH}_2$ ), 21.92 (d,  $J_{\text{C-P}} = 1.9$  Hz,  $\text{CH}_2$ ), 14.50 (s,  $\text{CH}_3$ ), 14.43 (s,  $\text{CH}_3$ );  $^{31}\text{P}$  NMR (162 MHz,  $\text{CDCl}_3$ )  $\delta$  41.46; HRMS Calcd. For  $\text{C}_{20}\text{H}_{24}\text{OP}^+$  [ $\text{M} + \text{H}^+$ ] $^+$ , 311,1559. Found: 311,1555.

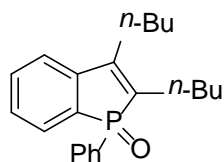

**3m**

**3m:** Reaction condition as general procedure for synthesis of compounds **3a**, the white solid **3m** was afforded (yield 65%, 109.9 mg);  $^1\text{H}$  NMR (400 MHz, Chloroform-*d*)  $\delta$  7.60 – 7.52 (m, 2H), 7.46 (dd,  $J = 9.7, 7.2$  Hz, 1H), 7.42 – 7.37 (m, 2H), 7.32 – 7.26 (m, 3H), 7.20 – 7.15(m, 1H), 2.52 (t,  $J = 7.8$  Hz, 2H), 2.48 – 2.35 (m, 1H), 2.24 – 2.14 (m, 1H), 1.55 – 1.46 (m, 2H), 1.43 – 1.36 (m, 2H), 1.34 – 1.23 (m, 2H), 1.19 – 1.12 (m, 2H), 0.90 (t,  $J = 7.2$  Hz, 3H), 0.69 (t,  $J = 7.2$  Hz, 3H);  $^{13}\text{C}$  NMR (101 MHz, Chloroform-*d*)  $\delta$  150.48 (d,  $J_{\text{C-P}} = 19.8$  Hz, C), 143.66 (d,  $J_{\text{C-P}} = 29.2$  Hz, C), 134.55 (d,  $J_{\text{C-P}} = 96.4$  Hz, C), 132.80 (d,  $J_{\text{C-P}} = 2.2$  Hz, CH), 132.23 (d,  $J_{\text{C-P}} = 105.2$  Hz, C), 131.87 (d,  $J_{\text{C-P}} = 2.9$  Hz, CH), 130.94 (d,  $J_{\text{C-P}} = 10.6$  Hz, 2CH), 130.33 (d,  $J_{\text{C-P}} = 96.9$  Hz, C), 128.68 (d,  $J_{\text{C-P}} = 12.1$  Hz, 2CH), 128.61 (d,  $J_{\text{C-P}} = 9.7$  Hz, CH), 128.22 (d,  $J_{\text{C-P}} = 10.4$  Hz, CH), 121.34 (d,  $J_{\text{C-P}} = 11.4$  Hz, CH), 30.98 (d,  $J_{\text{C-P}} = 1.8$  Hz,  $\text{CH}_2$ ), 30.62 (d,  $J_{\text{C-P}} = 1.9$  Hz,  $\text{CH}_2$ ), 26.33 (d,  $J_{\text{C-P}} = 13.4$  Hz,  $\text{CH}_2$ ), 25.84 (d,  $J_{\text{C-P}} = 10.8$  Hz,  $\text{CH}_2$ ), 23.08 (s,  $\text{CH}_2$ ), 22.85 (s,  $\text{CH}_2$ ), 13.94 (s,  $\text{CH}_3$ ), 13.65 (s,  $\text{CH}_3$ );  $^{31}\text{P}$  NMR (162 MHz,  $\text{CDCl}_3$ )  $\delta$  39.91; HRMS Calcd. For  $\text{C}_{22}\text{H}_{28}\text{OP}^+$  [ $\text{M} + \text{H}^+$ ] $^+$ , 339.1872. Found: 339.1866.

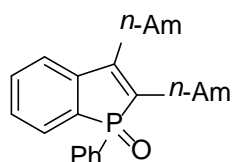

**3n**

**3n:** Reaction condition as general procedure for synthesis of compounds **3a**, the white solid **3n** was afforded (yield 62%, 113.5 mg);  $^1\text{H}$  NMR (400 MHz, Chloroform-*d*)  $\delta$  7.65 (dd,  $J = 12.4, 7.5$  Hz, 2H), 7.55 (dd,  $J = 9.7, 7.2$  Hz, 1H), 7.48 (t,  $J = 7.7$  Hz, 2H), 7.41 – 7.34 (m, 3H), 7.29 – 7.34(m, 1H), 2.60 (t,  $J = 7.8$  Hz, 2H), 2.54 – 2.43 (m, 1H), 2.33 – 2.21 (m, 1H), 1.66 – 1.55 (m, 2H), 1.45 – 1.33 (m, 6H), 1.24 – 1.12 (m, 4H), 0.92 (t,  $J = 6.9$  Hz, 3H), 0.80 – 0.72 (m, 3H);  $^{13}\text{C}$  NMR (101 MHz, Chloroform-*d*)  $\delta$  150.64 (d,  $J_{\text{C-P}} = 20.1$  Hz, C), 143.71 (d,  $J_{\text{C-P}} = 29.3$  Hz, C), 134.52 (d,  $J_{\text{C-P}} = 96.4$  Hz, C), 132.91 (d,  $J_{\text{C-P}} = 2.0$  Hz, CH), 132.10 (d,  $J_{\text{C-P}} = 105.4$  Hz, C), 131.98 (d,  $J_{\text{C-P}} = 2.8$  Hz, CH), 131.00 (d,  $J_{\text{C-P}} = 10.7$  Hz, 2CH), 130.20 (d,  $J_{\text{C-P}} = 97.4$  Hz, C), 128.74 (d,  $J_{\text{C-P}} = 12.1$  Hz, 2CH), 128.69 (d,  $J_{\text{C-P}} = 9.7$  Hz, CH), 128.30 (d,  $J_{\text{C-P}} = 10.5$  Hz, CH), 121.41 (d,  $J_{\text{C-P}} = 11.4$  Hz, CH), 32.17 (s,  $\text{CH}_2$ ), 31.96 (s,  $\text{CH}_2$ ), 28.62 (d,  $J_{\text{C-P}} = 1.8$  Hz,  $\text{CH}_2$ ), 28.22 (d,  $J_{\text{C-P}} = 2.0$  Hz,  $\text{CH}_2$ ), 26.63 (d,  $J_{\text{C-P}} = 13.3$  Hz,  $\text{CH}_2$ ), 26.11 (d,  $J_{\text{C-P}} = 10.9$

Hz, CH<sub>2</sub>), 22.55 (s, CH<sub>2</sub>), 22.28 (s, CH<sub>2</sub>), 14.05 (s, CH<sub>3</sub>), 13.93 (s, CH<sub>3</sub>); <sup>31</sup>P NMR (162 MHz, CDCl<sub>3</sub>) δ 40.28; HRMS Calcd. For C<sub>24</sub>H<sub>32</sub>OP<sup>+</sup> [M + H]<sup>+</sup>, 367.2185. Found: 367.2184.

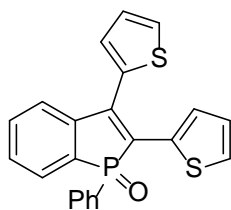

**3o**

**3o:** Reaction condition as general procedure for synthesis of compounds **3a**, the white solid **3p** was afforded (yield 55%, 108.1 mg); <sup>1</sup>H NMR (400 MHz, Chloroform-*d*) δ 7.82 (dd, *J* = 12.9, 7.5 Hz, 2H), 7.66 (dd, *J* = 15.3, 6.0 Hz, 2H), 7.51 (q, *J* = 6.0, 4.4 Hz, 1H), 7.47 – 7.42 (m, 4H), 7.34 (td, *J* = 7.4, 4.0 Hz, 1H), 7.27 (d, *J* = 4.2 Hz, 1H), 7.18 (q, *J* = 3.8, 2.8 Hz, 3H), 6.88 (t, *J* = 4.6 Hz, 1H); <sup>13</sup>C NMR (101 MHz, Chloroform-*d*) δ 144.66 (d, *J*<sub>C-P</sub> = 25.0 Hz, C), 139.20 (d, *J*<sub>C-P</sub> = 23.1 Hz, C), 135.10 (d, *J*<sub>C-P</sub> = 14.3 Hz, C), 133.53 (d, *J*<sub>C-P</sub> = 2.4 Hz, CH), 133.08 (d, *J*<sub>C-P</sub> = 63.1 Hz, C), 132.56 (d, *J*<sub>C-P</sub> = 2.9 Hz, CH), 131.58 (d, *J*<sub>C-P</sub> = 49.5 Hz, C), 131.06 (d, *J*<sub>C-P</sub> = 10.9 Hz, 2CH), 130.44 (d, *J*<sub>C-P</sub> = 33.5 Hz, C), 130.14 (d, *J*<sub>C-P</sub> = 4.5 Hz, CH), 129.35 (d, *J*<sub>C-P</sub> = 52.3 Hz, C), 129.19 (d, *J*<sub>C-P</sub> = 3.5 Hz, 2CH), 129.09 (s, CH), 129.02 (d, *J*<sub>C-P</sub> = 21.3 Hz, CH), 129.01 (s, CH), 128.68 (s, CH), 128.57 (s, CH), 128.39 (s, CH), 127.07 (s, CH), 123.80 (d, *J*<sub>C-P</sub> = 10.9 Hz, CH); <sup>31</sup>P NMR (162 MHz, CDCl<sub>3</sub>) δ 37.91; HRMS Calcd. For C<sub>22</sub>H<sub>16</sub>OPS<sub>2</sub><sup>+</sup> [M + H]<sup>+</sup>, 391.0375. Found: 391.0371.

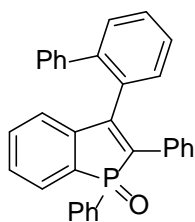

**3p**

**3p:** Reaction condition as general procedure for synthesis of compounds **3a**, the brown solid **3o** was afforded (yield 66%, 149.9 mg); <sup>1</sup>H NMR (400 MHz, Chloroform-*d*) δ 7.62 (t, *J* = 8.5, 1H), 7.58 – 7.46 (m, 6H), 7.46 – 7.36 (m, 4H), 7.36 – 7.27 (m, 2H), 7.23 (d, *J* = 7.0, 1H), 7.20 – 7.10 (m, 8H), 7.06 – 7.02 (m, 1H); <sup>13</sup>C NMR (101 MHz, Chloroform-*d*) δ 149.91 (d, *J*<sub>C-P</sub> = 22.0 Hz, C), 144.44 (d, *J*<sub>C-P</sub> = 26.9 Hz, C), 141.39 (s, C), 141.21 (s, C), 135.09 (d, *J*<sub>C-P</sub> = 95.7 Hz, C), 133.17 (d, *J*<sub>C-P</sub> = 75.5 Hz, C), 132.92 (d, *J*<sub>C-P</sub> = 2.4 Hz, CH), 132.92 (d, *J*<sub>C-P</sub> = 96.6 Hz, C), 132.25 (d, *J*<sub>C-P</sub> = 2.9 Hz, CH), 131.25 (d, *J*<sub>C-P</sub> = 11.0 Hz, 2CH), 131.08 (d, *J*<sub>C-P</sub> = 62.2 Hz, C), 130.90 (s, CH), 130.03 (s, CH), 129.16 (d, *J*<sub>C-P</sub> = 124.7 Hz, C), 129.08 (s, 2CH), 128.86 (s, 2CH), 128.83 (d, *J*<sub>C-P</sub> = 27.0 Hz, CH), 128.80 (s, CH), 128.73 (s, CH), 128.55 (s, 2CH), 128.35 (s, 2CH), 128.25 (s, 2CH), 128.16 (d, *J*<sub>C-P</sub> = 30.6 Hz, 2CH), 127.26 (s, CH), 124.38 (d, *J*<sub>C-P</sub> = 10.7 Hz, CH); <sup>31</sup>P NMR (162 MHz, CDCl<sub>3</sub>) δ 39.81; HRMS Calcd. For C<sub>32</sub>H<sub>24</sub>OP<sup>+</sup> [M + H]<sup>+</sup>, 455.1559. Found: 455.1558.

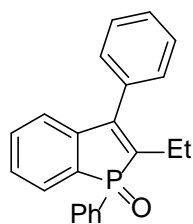

**3q**

**3q:** Reaction condition as general procedure for synthesis of compounds **3a**, the white solid **3q** was afforded (yield 59%, 97.4 mg);  $^1\text{H}$  NMR (400 MHz, Chloroform-*d*)  $\delta$  7.83 – 7.72 (m, 2H), 7.65 – 7.59 (m, 1H), 7.56 – 7.49 (m, 3H), 7.48 – 7.41 (m, 3H), 7.39 (d,  $J = 7.5$  Hz, 1H), 7.35 – 7.27 (m, 3H), 7.08 – 6.97 (dd,  $J = 7.6, 3.0$  Hz, 1H), 2.55 – 2.39 (m, 1H), 2.33 – 2.19 (m, 1H), 0.96 (t,  $J = 7.6$  Hz, 3H);  $^{13}\text{C}$  NMR (101 MHz, Chloroform-*d*)  $\delta$  150.22 (d,  $J_{\text{C-P}} = 22.2$  Hz, C), 144.36 (d,  $J_{\text{C-P}} = 28.0$  Hz, C), 138.00 (d,  $J_{\text{C-P}} = 93.9$  Hz, C), 134.03 (d,  $J_{\text{C-P}} = 15.9$  Hz, C), 132.92 (d,  $J_{\text{C-P}} = 2.2$  Hz, CH), 132.22 (d,  $J_{\text{C-P}} = 2.9$  Hz, CH), 132.01 (d,  $J_{\text{C-P}} = 105.3$  Hz, C), 131.08 (d,  $J_{\text{C-P}} = 10.7$  Hz, 2CH), 130.21 (d,  $J_{\text{C-P}} = 97.6$  Hz, C), 129.03 (s, CH), 128.91 (s, 2CH), 128.84 (d,  $J_{\text{C-P}} = 28.6$  Hz, CH), 128.64 (s, CH), 128.73 (d,  $J_{\text{C-P}} = 30.1$  Hz, 2CH), 128.58 (s, 2CH), 123.38 (d,  $J_{\text{C-P}} = 11.0$  Hz, CH), 20.10 (d,  $J_{\text{C-P}} = 10.3$  Hz,  $\text{CH}_2$ ), 13.97 (d,  $J_{\text{C-P}} = 2.1$  Hz,  $\text{CH}_3$ );  $^{31}\text{P}$  NMR (162 MHz,  $\text{CDCl}_3$ )  $\delta$  39.82; HRMS Calcd. For  $\text{C}_{22}\text{H}_{20}\text{OP}^+$  [ $\text{M} + \text{H}^+$ ] $^+$ , 331.1246. Found: 331.1248.

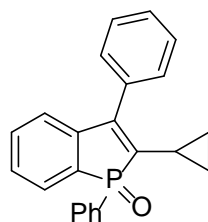

**3r**

**3r:** Reaction condition as general procedure for synthesis of compounds **3a**, the white solid **3r** was afforded (yield 56%, 95.8 mg);  $^1\text{H}$  NMR (400 MHz, Chloroform-*d*)  $\delta$  7.82 – 7.72 (m, 2H), 7.56 – 7.49 (m, 4H), 7.48 – 7.41 (m, 5H), 7.39 – 7.34 (m, 1H), 7.26 – 7.20 (m, 1H), 7.07 – 7.01 (m, 1H), 1.70 – 1.57 (m, 1H), 1.29 – 1.22 (m, 1H), 0.81 – 0.72 (m, 1H), 0.55 (q,  $J = 7.4$  Hz, 2H);  $^{13}\text{C}$  NMR (101 MHz, Chloroform-*d*)  $\delta$  150.14 (d,  $J_{\text{C-P}} = 22.1$  Hz, C), 143.77 (d,  $J_{\text{C-P}} = 26.6$  Hz, C), 137.51 (d,  $J_{\text{C-P}} = 96.8$  Hz, C), 134.30 (d,  $J_{\text{C-P}} = 15.1$  Hz, C), 132.86 (d,  $J_{\text{C-P}} = 1.8$  Hz, CH), 132.17 (d,  $J_{\text{C-P}} = 2.9$  Hz, CH), 131.94 (d,  $J_{\text{C-P}} = 106.6$  Hz, C), 130.96 (d,  $J_{\text{C-P}} = 10.7$  Hz, 2CH), 130.70 (d,  $J_{\text{C-P}} = 97.3$  Hz, C), 129.08 (s, 3CH), 128.95 (s, CH), 128.84 (s, 2CH), 128.68 (d,  $J_{\text{C-P}} = 9.8$  Hz, CH), 128.57 (s, CH), 128.36 (d,  $J_{\text{C-P}} = 10.8$  Hz, CH), 122.66 (d,  $J_{\text{C-P}} = 10.8$  Hz, CH), 11.06 (d,  $J_{\text{C-P}} = 9.4$  Hz, CH), 7.44 (d,  $J_{\text{C-P}} = 3.2$  Hz,  $\text{CH}_2$ ), 7.12 (d,  $J_{\text{C-P}} = 2.3$  Hz,  $\text{CH}_2$ );  $^{31}\text{P}$  NMR (162 MHz,  $\text{CDCl}_3$ )  $\delta$  37.56; HRMS Calcd. For  $\text{C}_{23}\text{H}_{20}\text{OP}^+$  [ $\text{M} + \text{H}^+$ ] $^+$ , 343.1246. Found: 343.1249.

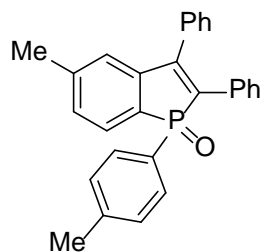

**3s**

**3s:** Reaction condition as general procedure for synthesis of compounds **3a**, the white solid **3s** was afforded (yield 71%, 144.2 mg);  $^1\text{H}$  NMR (400 MHz, Chloroform-*d*)  $\delta$  7.67 (dd,  $J = 12.3, 7.8$  Hz, 2H), 7.50 (d,  $J = 10.1$  Hz, 1H), 7.44 – 7.38 (d,  $J = 6.6$  Hz, 3H), 7.34 – 7.29 (m, 2H), 7.24 – 7.18 (m, 5H), 7.10 – 7.05 (m, 4H), 2.33 (s, 6H);  $^{13}\text{C}$  NMR (101 MHz, Chloroform-*d*)  $\delta$  150.08 (d,  $J_{\text{C-P}} = 21.5$  Hz, C), 142.74 (d,  $J_{\text{C-P}} = 3.0$  Hz, C), 141.17 (d,  $J_{\text{C-P}} = 26.8$  Hz, C), 139.51 (d,  $J_{\text{C-P}} = 10.4$  Hz, C), 134.62 (d,  $J_{\text{C-P}} = 15.1$  Hz, C), 133.41 (d,  $J_{\text{C-P}} = 97.0$  Hz, C), 133.33 (d,  $J_{\text{C-P}} = 2.1$  Hz, CH), 133.07 (s, C), 132.50 (d,  $J_{\text{C-P}} = 96.1$  Hz, C), 131.08 (d,  $J_{\text{C-P}} = 11.0$  Hz, 2CH), 129.82 (d,  $J_{\text{C-P}} = 9.6$  Hz, CH), 129.77 (d,  $J_{\text{C-P}} = 12.7$  Hz, 2CH), 129.13 (d,  $J_{\text{C-P}} = 5.9$  Hz, 2CH), 129.13 (s, 2CH), 129.00 (s, 2CH), 128.67 (s, CH), 128.28 (s, 2CH), 127.70 (s, CH), 126.72 (d,  $J_{\text{C-P}} = 101.9$  Hz, C), 123.96 (d,  $J_{\text{C-P}} = 11.4$  Hz, CH), 21.72 (s,  $\text{CH}_3$ ), 21.35 (s,  $\text{CH}_3$ );  $^{31}\text{P}$  NMR (162 MHz,  $\text{CDCl}_3$ )  $\delta$  39.50; HRMS Calcd. For  $\text{C}_{28}\text{H}_{24}\text{OP}^+$  [ $\text{M} + \text{H}^+$ ] $^+$ , 407.1559. Found: 407.1555.

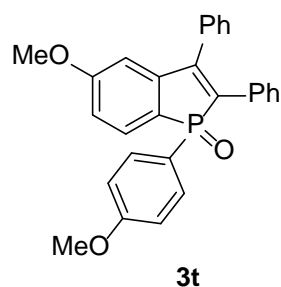

**3t:** Reaction condition as general procedure for synthesis of compounds **3a**, the yellow solid **3t** was afforded (yield 75%, 164.3 mg);  $^1\text{H}$  NMR (400 MHz, Chloroform-*d*)  $\delta$  7.56 (dd,  $J = 11.9, 8.4$  Hz, 2H), 7.27 (d,  $J = 6.6$  Hz, 3H), 7.20 – 7.13 (m, 2H), 7.13 – 7.10 (m, 1H), 7.09 – 7.01 (m, 2H), 6.99 – 6.88 (m, 4H), 6.82 – 6.68 (m, 3H), 3.66 (d,  $J = 2.7$  Hz, 6H);  $^{13}\text{C}$  NMR (101 MHz, Chloroform-*d*)  $\delta$  162.82 (d,  $J_{\text{C-P}} = 2.8$ , C), 160.73 (d,  $J_{\text{C-P}} = 13.4$  Hz, C), 149.79 (d,  $J_{\text{C-P}} = 21.2$  Hz, C), 136.07 (d,  $J_{\text{C-P}} = 26.9$  Hz, C), 134.62 (d,  $J_{\text{C-P}} = 15.3$  Hz, C), 134.48 (d,  $J_{\text{C-P}} = 104.9$  Hz, C), 133.05 (d,  $J_{\text{C-P}} = 10.1$  Hz, C), 132.87 (d,  $J_{\text{C-P}} = 12.1$  Hz, 2CH), 130.40 (d,  $J_{\text{C-P}} = 284.5$  Hz, C), 129.02 (s, 2CH), 128.97 (d,  $J_{\text{C-P}} = 5.6$  Hz, 2CH), 128.89 (s, 2CH), 128.57 (s, CH), 128.19 (s, 2CH), 127.45 (s, CH), 125.20 (d,  $J_{\text{C-P}} = 12.7$  Hz, CH), 120.66 (d,  $J_{\text{C-P}} = 105.5$  Hz, C), 117.85 (s, CH), 114.59 (d,  $J_{\text{C-P}} = 13.3$  Hz, 2CH), 114.56 (d,  $J_{\text{C-P}} = 10.8$  Hz, CH), 55.70 (s,  $\text{CH}_3$ ), 55.28 (s,  $\text{CH}_3$ );  $^{31}\text{P}$  NMR (162 MHz,  $\text{CDCl}_3$ )  $\delta$  38.99; HRMS Calcd. For  $\text{C}_{28}\text{H}_{24}\text{O}_3\text{P}^+$  [ $\text{M} + \text{H}^+$ ] $^+$ , 439.1458. Found: 439.1457.

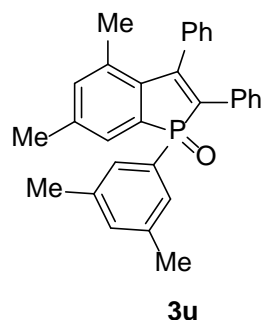

**3u:** Reaction condition as general procedure for synthesis of compounds **3a**, the white solid **3u** was afforded (yield 73%, 158.5 mg);  $^1\text{H}$  NMR (400 MHz, Chloroform-*d*)  $\delta$  7.44 – 7.30 (m, 7H), 7.23 – 7.18 (m, 1H), 7.15 – 7.07 (m, 3H), 7.06 – 7.00 (m, 3H), 6.98 (s, 1H), 2.28 (s, 9H), 1.73 (d,  $J = 1.8$  Hz, 3H);  $^{13}\text{C}$  NMR (101 MHz, Chloroform-*d*)  $\delta$  152.67 (d,  $J_{\text{C-P}} = 21.4$  Hz, C), 139.32 (d,  $J_{\text{C-P}} = 11.6$  Hz, C), 138.57 (d,  $J_{\text{C-P}} = 12.9$  Hz, 2C), 137.94 (d,  $J_{\text{C-P}} = 15.2$  Hz, C), 137.80 (d,  $J_{\text{C-P}} = 26.2$  Hz, C), 137.77 (d,  $J_{\text{C-P}} = 2.1$  Hz, CH), 134.71 (d,  $J_{\text{C-P}} = 109.9$  Hz, C), 134.14 (d,  $J_{\text{C-P}} = 203.2$  Hz, 2C), 134.13 (d,  $J_{\text{C-P}} = 18.4$



Hz, C), 134.05 (d,  $J_{C-P}$  = 3.0 Hz, CH), 131.71 (d,  $J_{C-P}$  = 302.3 Hz, C), 129.27 (s, CH), 129.17 (d,  $J_{C-P}$  = 5.5 Hz, 2CH), 128.80 (s, CH), 128.69 (s, CH), 128.65 (s, CH), 128.60 (d,  $J_{C-P}$  = 2.5 Hz, 2CH), 128.20 (s, CH), 128.08 (s, 2CH), 128.01 (d,  $J_{C-P}$  = 9.7 Hz, CH), 127.41 (s, CH), 21.42 (s, 3CH<sub>3</sub>), 21.02 (s, CH<sub>3</sub>); <sup>31</sup>P NMR (162 MHz, CDCl<sub>3</sub>) δ 38.39; HRMS Calcd. For C<sub>30</sub>H<sub>28</sub>OP<sup>+</sup> [M + H]<sup>+</sup>, 435.1872. Found: 435.1875.

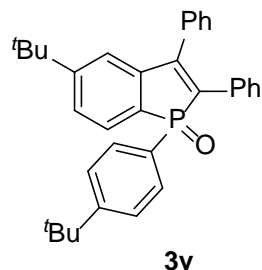

**3v:** Reaction condition as general procedure for synthesis of compounds **3a**, the white solid **3v** was afforded (yield 79%, 193.6 mg); <sup>1</sup>H NMR (400 MHz, Chloroform-*d*) δ 7.68 – 7.61 (m, 1H), 7.59 – 7.53 (m, 2H), 7.34 – 7.25 (m, 6H), 7.19 – 7.15 (m, 2H), 7.13 – 7.09 (m, 2H), 7.00 – 6.94 (m, 4H), 1.16 (s, 9H), 1.15 (s, 9H); <sup>13</sup>C NMR (101 MHz, Chloroform-*d*) δ 155.61 (d,  $J_{C-P}$  = 2.9 Hz, C), 152.81 (d,  $J_{C-P}$  = 9.7 Hz, C), 149.79 (d,  $J_{C-P}$  = 21.5 Hz, C), 141.26 (d,  $J_{C-P}$  = 27.2 Hz, C), 134.74 (d,  $J_{C-P}$  = 15.0 Hz, C), 134.00 (d,  $J_{C-P}$  = 96.2 Hz, C), 133.22 (d,  $J_{C-P}$  = 9.9 Hz, C), 132.27 (d,  $J_{C-P}$  = 105.5 Hz, C), 131.01 (d,  $J_{C-P}$  = 10.9 Hz, 2CH), 129.79 (d,  $J_{C-P}$  = 2.0 Hz, CH), 129.23 (d,  $J_{C-P}$  = 5.6 Hz, 2CH), 129.15 (s, 2CH), 128.99 (s, 2CH), 128.63 (s, CH), 128.30 (s, 2CH), 127.70 (s, CH), 126.95 (d,  $J_{C-P}$  = 101.8 Hz, C), 126.30 (d,  $J_{C-P}$  = 9.9 Hz, CH), 126.02 (d,  $J_{C-P}$  = 12.5 Hz, 2CH), 123.80 (d,  $J_{C-P}$  = 11.5 Hz, CH), 35.20 (s, C), 35.11 (s, C), 31.35 (s, 3CH<sub>3</sub>), 31.20 (s, 3CH<sub>3</sub>); <sup>31</sup>P NMR (162 MHz, CDCl<sub>3</sub>) δ 39.73; HRMS Calcd. For C<sub>34</sub>H<sub>36</sub>OP<sup>+</sup> [M + H]<sup>+</sup>, 491.2498. Found: 491.2496.

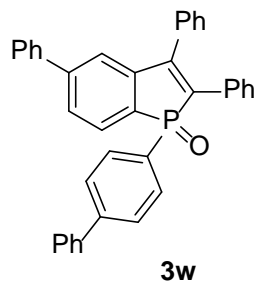

**3w:** Reaction condition as general procedure for synthesis of compounds **3a**, the white solid **3w** was afforded (yield 78%, 206.8 mg); <sup>1</sup>H NMR (400 MHz, Chloroform-*d*) δ 7.99 (d,  $J$  = 10.4 Hz, 1H), 7.87 (dd,  $J$  = 12.2, 7.9 Hz, 2H), 7.69 (d,  $J$  = 8.0 Hz, 1H), 7.63 – 7.58 (m, 3H), 7.54 (d,  $J$  = 7.7 Hz, 2H), 7.51 – 7.33 (m, 12H), 7.31 – 7.27 (m, 3H), 7.15 – 7.08 (m, 3H); <sup>13</sup>C NMR (101 MHz, Chloroform-*d*) δ 149.69 (d,  $J_{C-P}$  = 21.4 Hz, C), 143.95 (d,  $J_{C-P}$  = 27.0 Hz, C), 141.62 (s, C), 140.55 (s, C), 140.41 (d,  $J_{C-P}$  = 5.8 Hz, 2C), 134.13 (d,  $J_{C-P}$  = 95.3 Hz, C), 133.44 (d,  $J_{C-P}$  = 15.0 Hz, C), 133.11 (s, CH), 132.51 (d,  $J_{C-P}$  = 66.6 Hz, C), 132.36 (d,  $J_{C-P}$  = 2.9 Hz, CH), 131.90 (d,  $J_{C-P}$  = 10.0 Hz, C), 131.26 (d,  $J_{C-P}$  = 106.8 Hz, C), 131.21 (s, CH), 131.11 (s, CH), 129.74 (s, 2CH), 129.63 (d,  $J_{C-P}$  = 5.9 Hz, 2CH), 129.33 (d,  $J_{C-P}$  = 4.6 Hz, CH), 129.23 (d,  $J_{C-P}$  = 3.7 Hz, CH), 129.13 (s, CH), 129.06 (s, 2CH), 129.01 (s, CH), 128.84 (s, 2CH), 127.80 (s, 2CH), 127.71 (d,  $J_{C-P}$  = 35.2 Hz, 2CH), 127.19 (s, 2CH), 127.08 (s, 2CH), 126.99 (s, 2CH), 124.21 (d,  $J_{C-P}$  = 10.7 Hz, CH); <sup>31</sup>P NMR (162 MHz, CDCl<sub>3</sub>) δ 39.64; HRMS Calcd. For C<sub>38</sub>H<sub>28</sub>OP<sup>+</sup> [M + H]<sup>+</sup>, 531.1872. Found: 531.1874

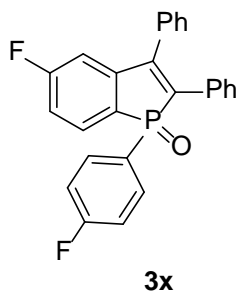

**3x**: Reaction condition as general procedure for synthesis of compounds **3a**, the yellow solid **3x** was afforded (yield 46%, 95.2 mg);  $^1\text{H}$  NMR (400 MHz, Chloroform-*d*)  $\delta$  7.79 – 7.71 (m, 2H), 7.69 – 7.63 (m, 1H), 7.46 – 7.39 (m, 3H), 7.32 – 7.27 (m, 2H), 7.24 – 7.20 (m, 2H), 7.11 – 6.99 (m, 6H), 6.92 (dd,  $J = 9.4, 2.4$  Hz, 1H);  $^{13}\text{C}$  NMR (101 MHz, Chloroform-*d*)  $\delta$  166.38 (dd,  $J_{\text{C-F}} = 254.5$  Hz,  $J_{\text{C-P}} = 2.3$  Hz, C), 165.50 (dd,  $J_{\text{C-F}} = 254.7$  Hz,  $J_{\text{C-P}} = 3.4$  Hz, C), 148.64 (dd,  $J_1 = 20.3$  Hz,  $J_2 = 1.9$  Hz, C), 147.08 (dd,  $J_1 = 29.5$  Hz,  $J_2 = 8.8$  Hz, C), 136.22 (d,  $J_{\text{C-P}} = 95.8$  Hz, C), 136.60 (d,  $J_{\text{C-P}} = 16.6$  Hz, C), 133.53 (dd,  $J_1 = 12.0$  Hz,  $J_2 = 9.1$  Hz, 2CH), 132.25 (d,  $J_{\text{C-P}} = 9.7$  Hz, C), 131.06 (dd,  $J_1 = 10.6$  Hz,  $J_2 = 10.2$  Hz, CH), 129.12 (d,  $J_{\text{C-P}} = 30.3$  Hz, 3CH), 129.07 (d,  $J_{\text{C-P}} = 14.9$  Hz, 2CH), 129.05 (s, CH), 128.47 (s, 2CH), 128.37 (s, CH), 127.94 (d,  $J_{\text{C-P}} = 7.8$  Hz, CH), 127.22 (dd,  $J_{\text{C-P}} = 109.7$  Hz,  $J_{\text{C-F}} = 3.3$  Hz, C), 125.38 (dd,  $J_{\text{C-P}} = 104.1$  Hz,  $J_{\text{C-F}} = 3.2$  Hz, C), 116.51 (dd,  $J_1 = 21.6$  Hz,  $J_2 = 13.6$  Hz, 2CH), 115.92 (dd,  $J_1 = 22.4$  Hz,  $J_2 = 11.8$  Hz, CH), 112.28 (dd,  $J_1 = 24.2$  Hz,  $J_2 = 12.4$  Hz, CH);  $\delta$  36.63; HRMS Calcd. For  $\text{C}_{26}\text{H}_{18}\text{F}_2\text{OP}^+ [\text{M} + \text{H}^+]^+$ , 415.1058. Found: 415.1063.

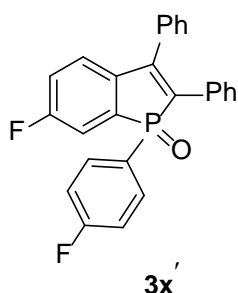

**3x'**:  $^1\text{H}$  NMR (400 MHz, Chloroform-*d*)  $\delta$  7.80 – 7.72 (m, 2H), 7.47 – 7.37 (m, 4H), 7.34 – 7.28 (m, 2H), 7.19 (q,  $J = 5.5$  Hz, 3H), 7.14 – 7.07 (m, 6H);  $^{13}\text{C}$  NMR (101 MHz, Chloroform-*d*)  $\delta$  165.65 (dd,  $J_{\text{C-F}} = 254.7$  Hz,  $J_{\text{C-P}} = 3.23$  Hz, C), 163.55 (dd,  $J_{\text{C-F}} = 253.2$  Hz,  $J_{\text{C-P}} = 15.3$  Hz, C), 149.58 (d,  $J = 20.8$  Hz, C), 139.61 (dd,  $J_1 = 27.0$  Hz,  $J_2 = 3.1$  Hz, C), 134.72 (dd,  $J_{\text{C-P}} = 105.2$  Hz,  $J_{\text{C-F}} = 6.8$  Hz, C), 134.45 (d,  $J_{\text{C-F}} = 4.0$  Hz, C), 134.03 (d,  $J = 15.5$  Hz, C), 133.59 (dd,  $J_1 = 12.1$  Hz,  $J_2 = 8.9$  Hz, 2CH), 132.44 (d,  $J = 9.9$  Hz, C), 129.25 (s, 2CH), 129.11 (s, CH), 129.06 (s, 3CH), 129.01 (s, CH), 128.52 (s, 2CH), 128.19 (s, CH), 125.94 (dd,  $J_1 = 12.8$  Hz,  $J_2 = 7.7$  Hz, CH), 125.16 (dd,  $J_{\text{C-P}} = 103.2$  Hz,  $J_{\text{C-F}} = 3.3$  Hz, C), 119.68 (d,  $J = 22.4$  Hz, CH), 116.97 (dd,  $J_1 = 20.1$  Hz,  $J_2 = 10.5$  Hz, CH), 116.65 (dd,  $J_1 = 21.5$  Hz,  $J_2 = 13.7$  Hz, 2CH);  $^{31}\text{P}$  NMR (162 MHz,  $\text{CDCl}_3$ )  $\delta$  36.98, 36.94; HRMS Calcd. For  $\text{C}_{26}\text{H}_{18}\text{F}_2\text{OP}^+ [\text{M} + \text{H}^+]^+$ , 415.1058. Found: 415.1055.

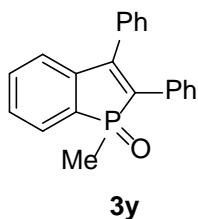

**3y**: Reaction condition as general procedure for synthesis of compounds **3a**, the white solid **3y** was afforded (yield 52%, 82.2 mg);  $^1\text{H}$  NMR (400 MHz, Chloroform-*d*)  $\delta$  7.31 – 7.15 (m, 7H), 1.76 (d,  $J$  = 13.0 Hz, 3H), 7.90 – 7.82 (m, 1H), 7.48 – 7.39 (m, 6H);  $^{13}\text{C}$  NMR (101 MHz, Chloroform-*d*)  $\delta$  148.23 (d,  $J_{\text{C-P}}$  = 21.3 Hz, C), 142.89 (d,  $J_{\text{C-P}}$  = 27.1 Hz, C), 134.33 (d,  $J_{\text{C-P}}$  = 14.9 Hz, C), 134.24 (d,  $J_{\text{C-P}}$  = 93.8 Hz, C), 133.00 (d,  $J_{\text{C-P}}$  = 10.2 Hz, C), 132.88 (d,  $J_{\text{C-P}}$  = 1.9 Hz, CH), 131.79 (d,  $J_{\text{C-P}}$  = 103.1 Hz, C), 129.19 (s, 2CH), 129.12 (s, CH), 129.06 (s, 2CH), 128.98 (d,  $J_{\text{C-P}}$  = 10.6 Hz, 2CH), 128.73 (s, CH), 128.61 (s, 2CH), 128.35 (d,  $J_{\text{C-P}}$  = 9.7 Hz, CH), 128.16 (s, CH), 124.12 (d,  $J_{\text{C-P}}$  = 10.6 Hz, CH), 14.93 (d,  $J_{\text{C-P}}$  = 69.2 Hz,  $\text{CH}_3$ );  $^{31}\text{P}$  NMR (162 MHz,  $\text{CDCl}_3$ )  $\delta$  45.28; HRMS Calcd. For  $\text{C}_{21}\text{H}_{18}\text{OP}^+$  [ $\text{M} + \text{H}^+$ ] $^+$ , 317.1090. Found: 317.1088.

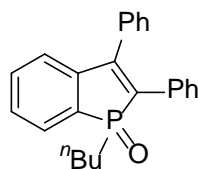

**3z**

**3z**: Reaction condition as general procedure for synthesis of compounds **3a**, the white solid **3z** was afforded (yield 55%, 98.5 mg);  $^1\text{H}$  NMR (400 MHz, Chloroform-*d*)  $\delta$  7.70 (t,  $J$  = 7.9 Hz, 1H), 7.33 – 7.24 (m, 6H), 7.18 – 6.95 (m, 7H), 1.86 – 1.72 (m, 2H), 1.37 – 1.24 (m, 2H), 1.21 – 1.11 (m, 3H), 0.66 (t,  $J$  = 7.3 Hz, 2H);  $^{13}\text{C}$  NMR (101 MHz, Chloroform-*d*)  $\delta$  148.99 (d,  $J_{\text{C-P}}$  = 20.0 Hz, C), 143.45 (d,  $J_{\text{C-P}}$  = 25.5 Hz, C), 134.39 (d,  $J_{\text{C-P}}$  = 14.4 Hz, C), 133.35 (d,  $J_{\text{C-P}}$  = 91.2 Hz, C), 133.32 (d,  $J_{\text{C-P}}$  = 9.9 Hz, C), 132.80 (d,  $J_{\text{C-P}}$  = 1.9 Hz, CH), 130.78 (d,  $J_{\text{C-P}}$  = 100.0 Hz, C), 129.18 (s, CH), 129.08 (d,  $J_{\text{C-P}}$  = 5.5 Hz, 2CH), 129.05 (s, CH), 129.03 (s, 2CH), 128.88 (s, CH), 128.73 (d,  $J_{\text{C-P}}$  = 11.3 Hz, 2CH), 128.56 (s, 2CH), 128.08 (s, CH), 124.05 (d,  $J_{\text{C-P}}$  = 10.3 Hz, CH), 28.37 (d,  $J_{\text{C-P}}$  = 67.5 Hz,  $\text{CH}_2$ ), 24.05 (d,  $J_{\text{C-P}}$  = 1.9 Hz,  $\text{CH}_2$ ), 23.96 (d,  $J_{\text{C-P}}$  = 15.3 Hz,  $\text{CH}_2$ ), 13.60 (s,  $\text{CH}_3$ );  $^{31}\text{P}$  NMR (162 MHz,  $\text{CDCl}_3$ )  $\delta$  50.53; HRMS Calcd. For  $\text{C}_{24}\text{H}_{24}\text{OP}^+$  [ $\text{M} + \text{H}^+$ ] $^+$ , 359.1559. Found: 359.1555.

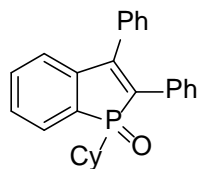

**3aa**

**3aa**: Reaction condition as general procedure for synthesis of compounds **3a**, the white solid **3aa** was afforded (yield 60%, 115.2 mg);  $^1\text{H}$  NMR (400 MHz, Chloroform-*d*)  $\delta$  7.86 (t,  $J$  = 7.6 Hz, 1H), 7.74 – 7.33 (m, 7H), 7.33 – 6.97 (m, 6H), 2.16 – 2.02 (m, 2H), 1.93 – 1.74 (m, 2H), 1.68 (d,  $J$  = 10.3 Hz, 1H), 1.58 – 0.98 (m, 5H), 0.99 – 0.84 (m, 1H);  $^{13}\text{C}$  NMR (101 MHz, Chloroform-*d*)  $\delta$  149.76 (d,  $J_{\text{C-P}}$  = 19.4 Hz, C), 143.99 (d,  $J_{\text{C-P}}$  = 24.7 Hz, C), 134.46 (d,  $J_{\text{C-P}}$  = 14.0 Hz, C), 133.85 (d,  $J_{\text{C-P}}$  = 9.7 Hz, C), 132.66 (d,  $J_{\text{C-P}}$  = 1.8 Hz, CH), 132.44 (d,  $J_{\text{C-P}}$  = 88.0 Hz, C), 129.86 (d,  $J_{\text{C-P}}$  = 97.1 Hz, C), 129.33 (d,  $J_{\text{C-P}}$  = 8.7 Hz, 2CH), 129.18 (s, CH), 129.12 (d,  $J_{\text{C-P}}$  = 5.3 Hz, 2CH), 128.97 (s, 2CH), 128.68 (s, CH), 128.63 (d,  $J_{\text{C-P}}$  = 9.8 Hz, CH), 128.58 (s, CH), 128.49 (s, 2CH), 123.94 (d,  $J_{\text{C-P}}$  = 10.0 Hz, CH), 37.61 (d,  $J_{\text{C-P}}$  = 68.4 Hz, CH), 26.37 (dd,  $J_{\text{C-P}}$  = 16.9, 13.8 Hz, 2 $\text{CH}_2$ ), 25.93 (s,  $\text{CH}_2$ ), 25.35 (d,  $J_{\text{C-P}}$  = 2.9 Hz, 2 $\text{CH}_2$ );  $^{31}\text{P}$  NMR (162 MHz,  $\text{CDCl}_3$ )  $\delta$  53.66; HRMS Calcd. For  $\text{C}_{26}\text{H}_{26}\text{OP}^+$  [ $\text{M} + \text{H}^+$ ] $^+$ , 385.1716. Found: 385.1711.

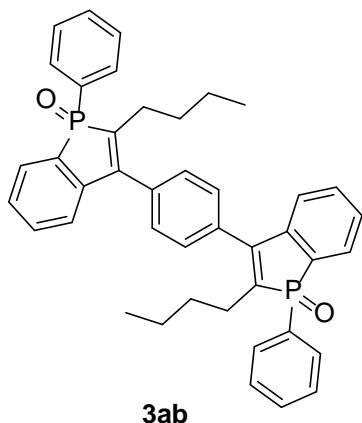

**3ab**

**3ab**: Reaction condition as general procedure for synthesis of compounds **3a**, the white solid **3ab** was afforded (yield 21%, 67.0 mg);  $^1\text{H}$  NMR (400 MHz, Chloroform-*d*)  $\delta$  7.79 – 7.73 (m, 3H), 7.67 – 7.61 (m, 2H), 7.54 (t,  $J = 7.4$ , 2H), 7.50 – 7.43 (m, 9H), 7.36 – 7.31 (m, 2H), 7.13 – 7.06 (m, 2H), 2.54 – 2.42 (m, 2H), 2.31 – 2.19 (m, 2H), 1.41 – 1.32 (m, 4H), 1.19 – 1.08 (m, 4H), 0.73 – 0.56 (m, 6H);  $^{13}\text{C}$  NMR (101 MHz, Chloroform-*d*)  $\delta$  149.78 (d,  $J_{\text{C-P}} = 22.3$  Hz, 2C), 144.15 (d,  $J_{\text{C-P}} = 28.0$  Hz, 2C), 137.72 (d,  $J_{\text{C-P}} = 93.1$  Hz, 2C), 134.42 (d,  $J_{\text{C-P}} = 16.7$  Hz, 2C), 133.05 (s, 2CH), 132.37 (s, 2CH), 131.94 (d,  $J_{\text{C-P}} = 105.0$  Hz, 2C), 131.10 (d,  $J_{\text{C-P}} = 10.7$  Hz, 4CH), 130.00 (d,  $J_{\text{C-P}} = 98.1$  Hz, 2C), 129.16 (s, 6CH), 129.07 (s, 2CH), 128.95 (s, 2CH), 128.85 (d,  $J_{\text{C-P}} = 10.7$  Hz, 2CH), 123.21 (d,  $J_{\text{C-P}} = 10.7$  Hz, 2CH), 30.93 (d,  $J_{\text{C-P}} = 1.4$  Hz, 2CH<sub>2</sub>), 26.48 (d,  $J_{\text{C-P}} = 9.5$  Hz, 2CH<sub>2</sub>), 22.71 (s, 2CH<sub>2</sub>), 13.54 (s, 2CH<sub>3</sub>);  $^{31}\text{P}$  NMR (162 MHz, CDCl<sub>3</sub>)  $\delta$  39.76; HRMS Calcd. For C<sub>42</sub>H<sub>41</sub>O<sub>2</sub>P<sub>2</sub><sup>+</sup> [M + H]<sup>+</sup>, 639.2576. Found: 639.2579.

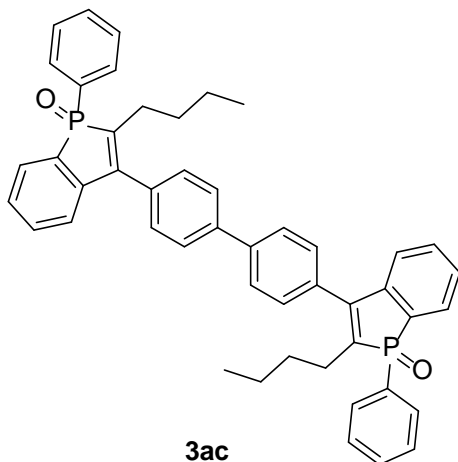

**3ac**

**3ac**: Reaction condition as general procedure for synthesis of compounds **3a**, the white solid **3ac** was afforded (yield 26%, 92.9 mg);  $^1\text{H}$  NMR (400 MHz, Chloroform-*d*)  $\delta$  7.84 – 7.75 (m, 7H), 7.67 – 7.61 (m, 2H), 7.55 (t,  $J = 7.4$  Hz, 2H), 7.51 – 7.37 (m, 10H), 7.36 – 7.30 (m, 2H), 7.15 – 7.06 (m, 2H), 2.58 – 2.44 (m, 2H), 2.32 – 2.21 (m, 2H), 1.43 – 1.31 (m, 4H), 1.21 – 1.09 (m, 4H), 0.68 (t,  $J = 7.3$  Hz, 6H);  $^{13}\text{C}$  NMR (101 MHz, Chloroform-*d*)  $\delta$  150.03 (d,  $J_{\text{C-P}} = 22.4$  Hz, 2C), 144.36 (d,  $J_{\text{C-P}} = 27.8$  Hz, 2C), 140.63 (s, 2C), 137.37 (d,  $J_{\text{C-P}} = 93.5$  Hz, 2C), 133.50 (d,  $J_{\text{C-P}} = 16.1$  Hz, 2C), 133.02 (d,  $J_{\text{C-P}} = 1.8$  Hz, 2CH), 132.30 (d,  $J_{\text{C-P}} = 2.9$  Hz, 2CH), 132.01 (d,  $J_{\text{C-P}} = 105.0$  Hz, 2C), 131.14 (d,  $J_{\text{C-P}} = 10.6$  Hz, 4CH), 130.18 (d,  $J_{\text{C-P}} = 97.7$  Hz, 2C), 129.35 (s, 4CH), 129.09 (d,  $J_{\text{C-P}} = 8.3$  Hz, 2CH), 1298.99 (d,  $J_{\text{C-P}} = 12.1$  Hz, 4CH), 128.75 (d,  $J_{\text{C-P}} = 10.5$  Hz, 2CH), 127.52 (s, 4CH), 123.33 (d,  $J_{\text{C-P}} = 10.9$  Hz, 2CH), 31.04 (s,

2CH<sub>2</sub>), 26.69 (d,  $J_{C-P}$  = 10.0 Hz, 2CH<sub>2</sub>), 22.84 (s, 2CH<sub>2</sub>), 13.65 (s, 2CH<sub>3</sub>); <sup>31</sup>P NMR (162 MHz, CDCl<sub>3</sub>) δ 39.99; HRMS Calcd. For C<sub>48</sub>H<sub>45</sub>O<sub>2</sub>P<sub>2</sub><sup>+</sup> [M + H]<sup>+</sup>, 715.2889. Found: 715.2880.

### 7. Copies of <sup>1</sup>H NMR, <sup>13</sup>C NMR, <sup>31</sup>P NMR Spectra of compounds **3**.

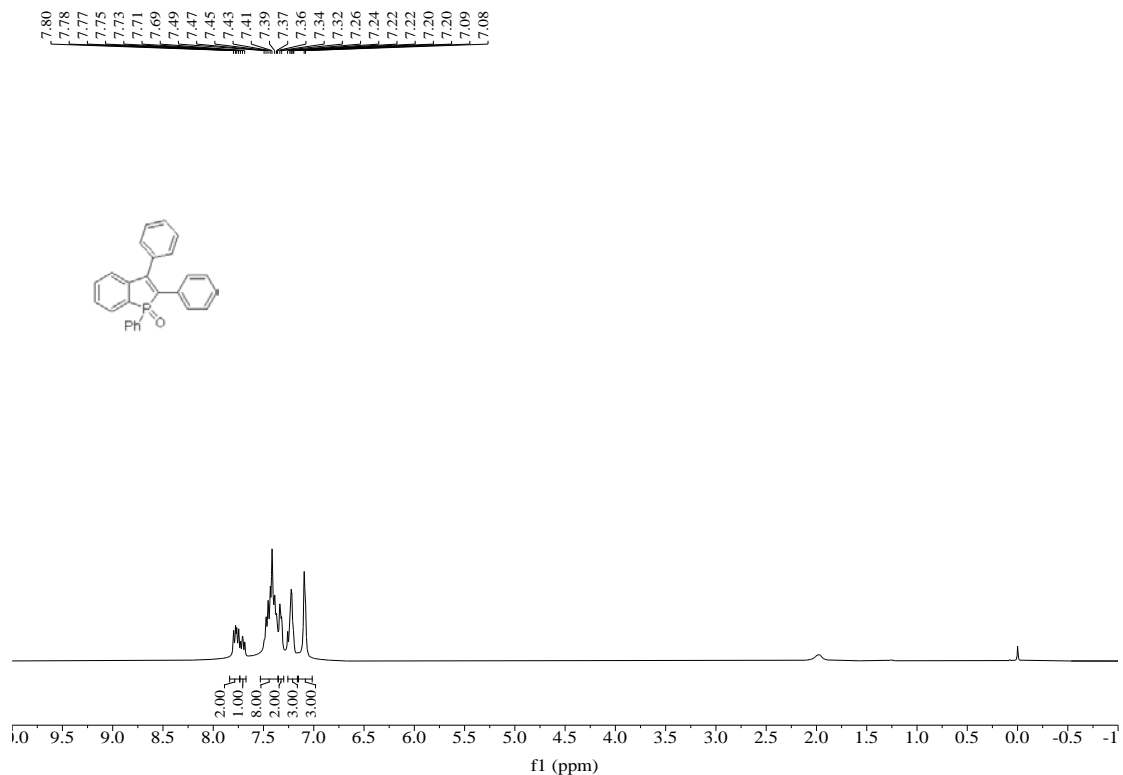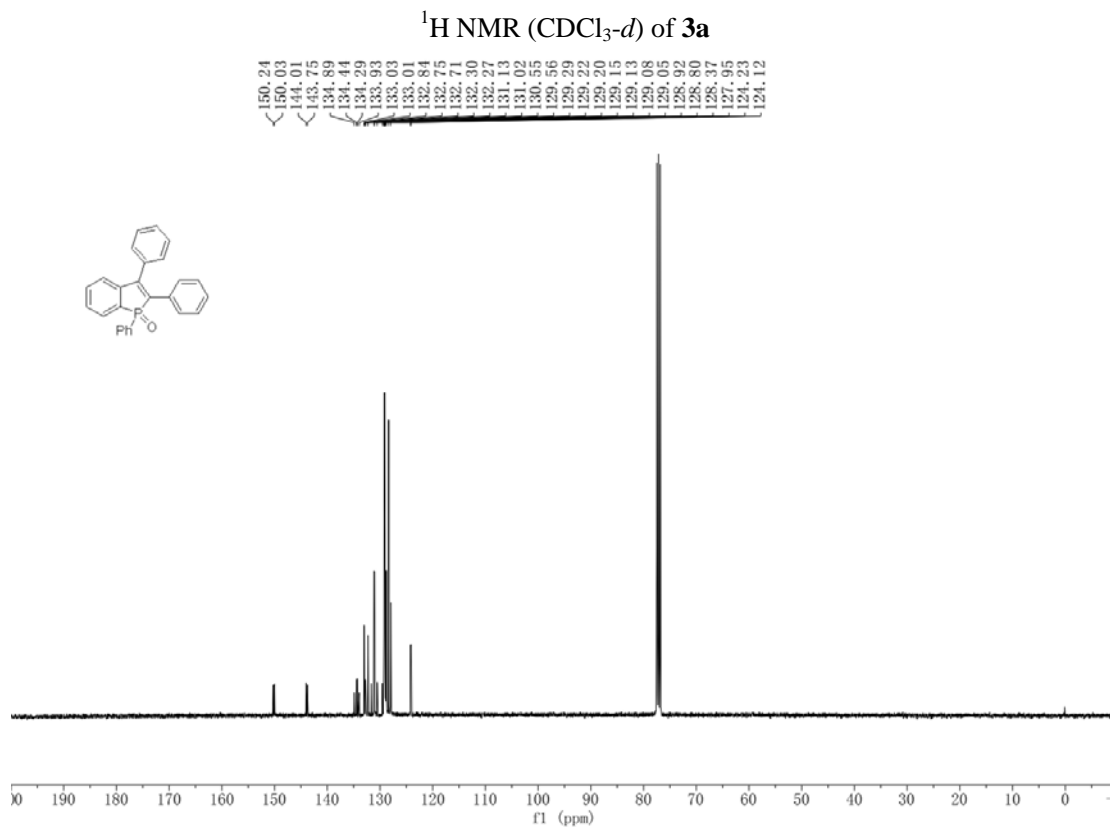

**<sup>13</sup>C NMR (CDCl<sub>3</sub>-d) of **3a****

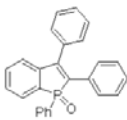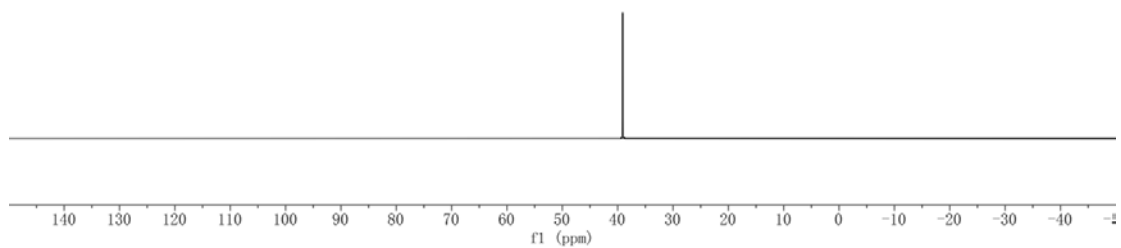

<sup>31</sup>P NMR (CDCl<sub>3</sub>-d) of **3a**

7.66  
7.60  
7.58  
7.57  
7.55  
7.31  
7.30  
7.23  
7.21  
7.19  
7.17  
7.16  
7.15  
7.14  
7.12  
7.10  
7.08  
7.07  
7.06

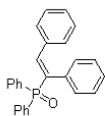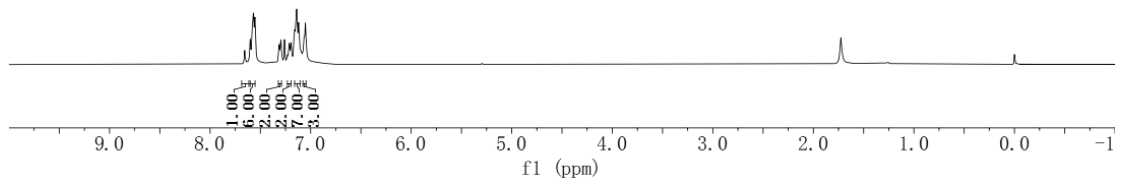

<sup>1</sup>H NMR (CDCl<sub>3</sub>-d) of **3a'**

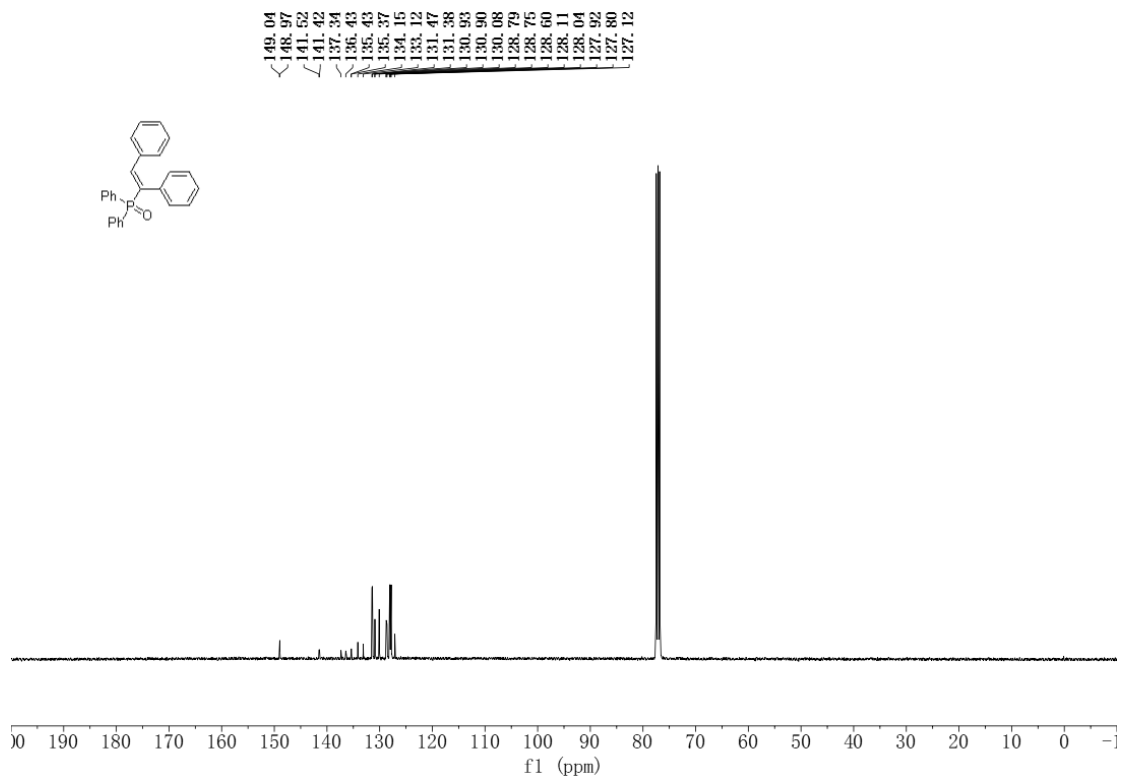

$^{13}\text{C}$  NMR ( $\text{CDCl}_3\text{-}d$ ) of **3a'**

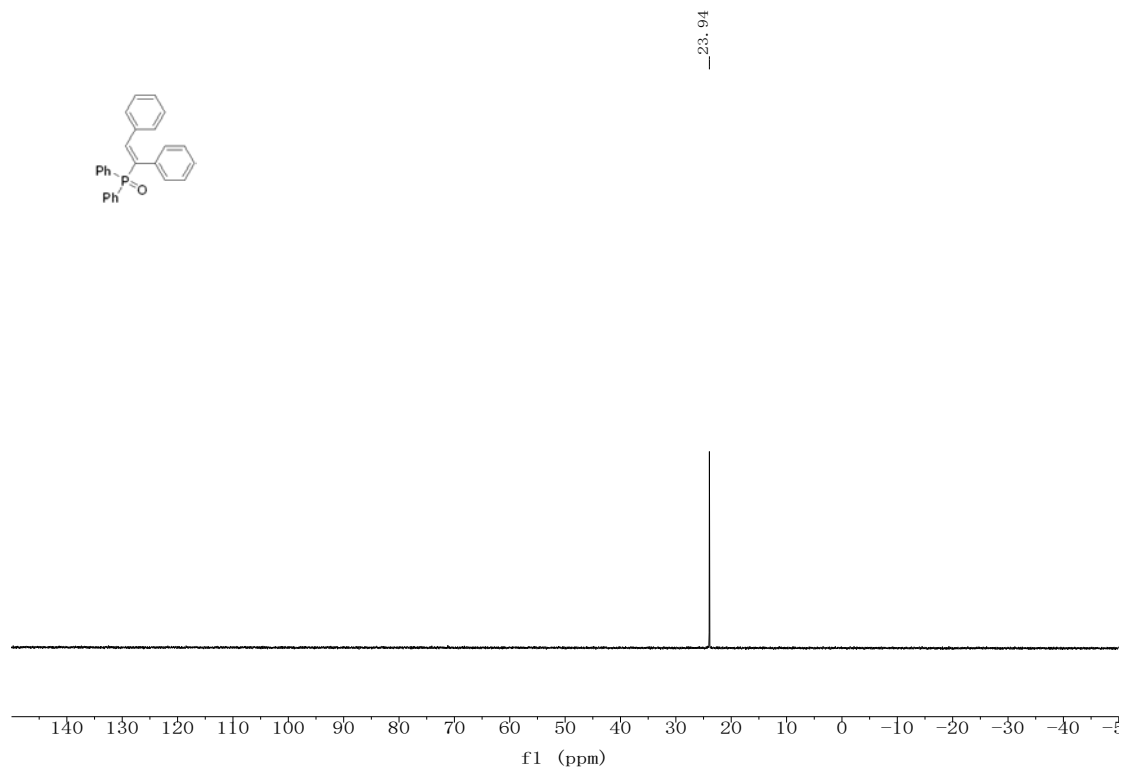

$^{31}\text{P}$  NMR ( $\text{CDCl}_3\text{-}d$ ) of **3a'**

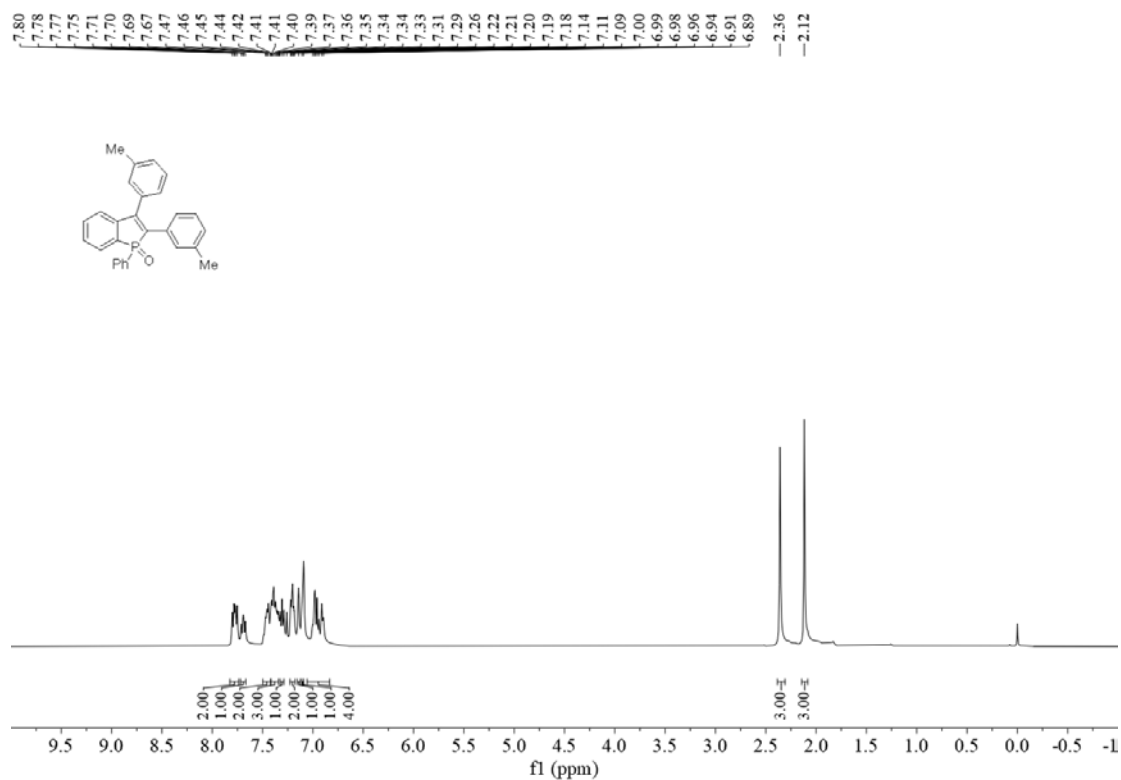

$^1\text{H}$  NMR ( $\text{CDCl}_3-d$ ) of **3b**

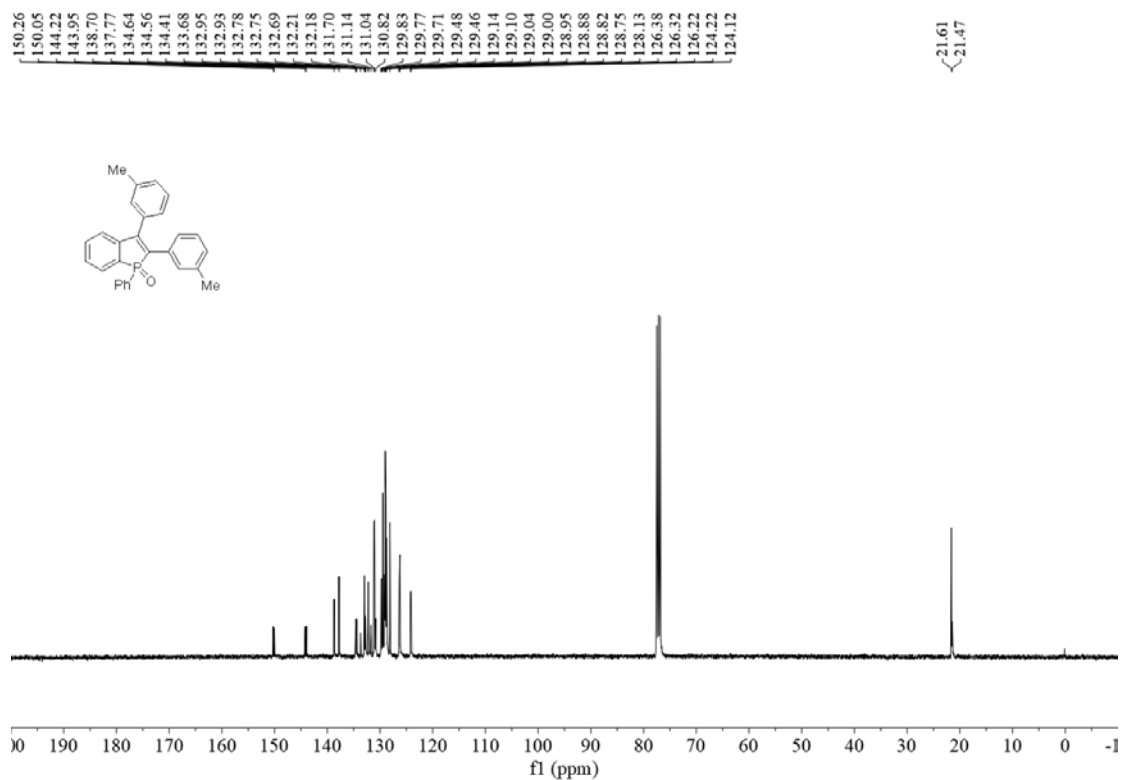

$^{13}\text{C}$  NMR ( $\text{CDCl}_3-d$ ) of **3b**



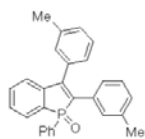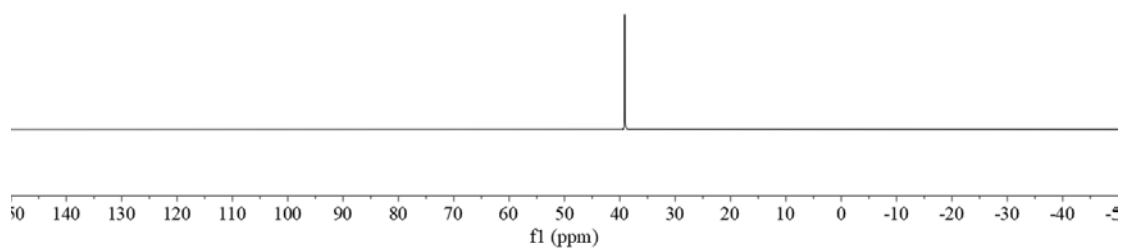

$^{31}\text{P}$  NMR ( $\text{CDCl}_3$ -*d*) of **3b**

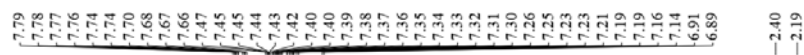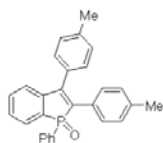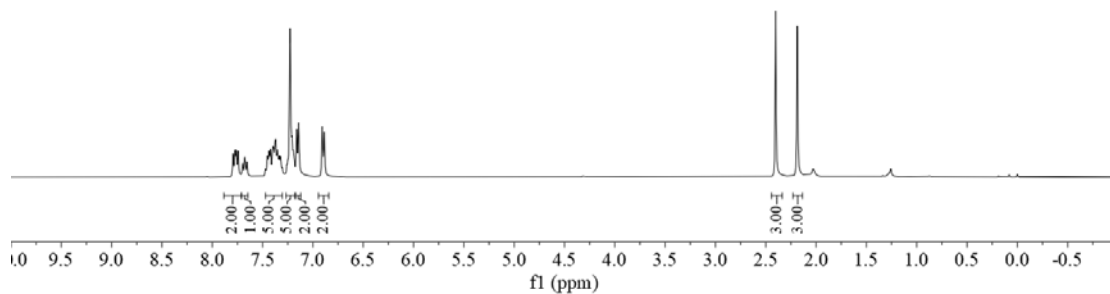

$^1\text{H}$  NMR ( $\text{CDCl}_3$ -*d*) of **3c**

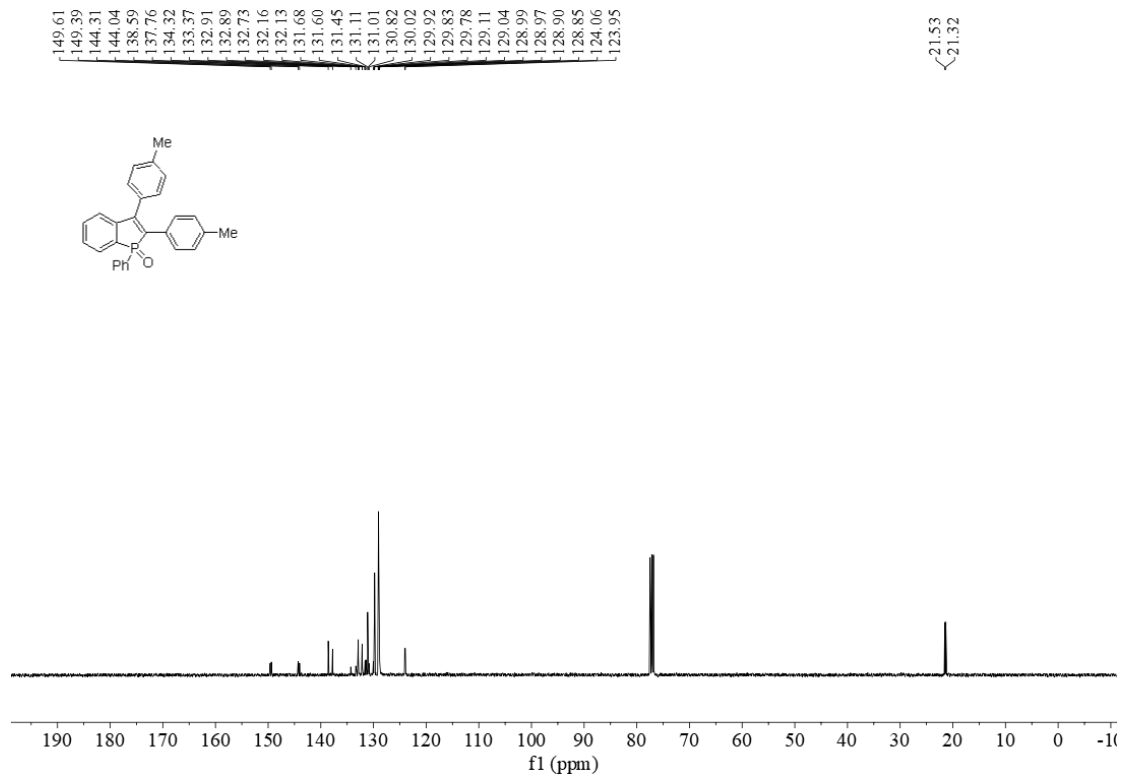

$^{13}\text{C}$  NMR ( $\text{CDCl}_3\text{-}d$ ) of **3c**

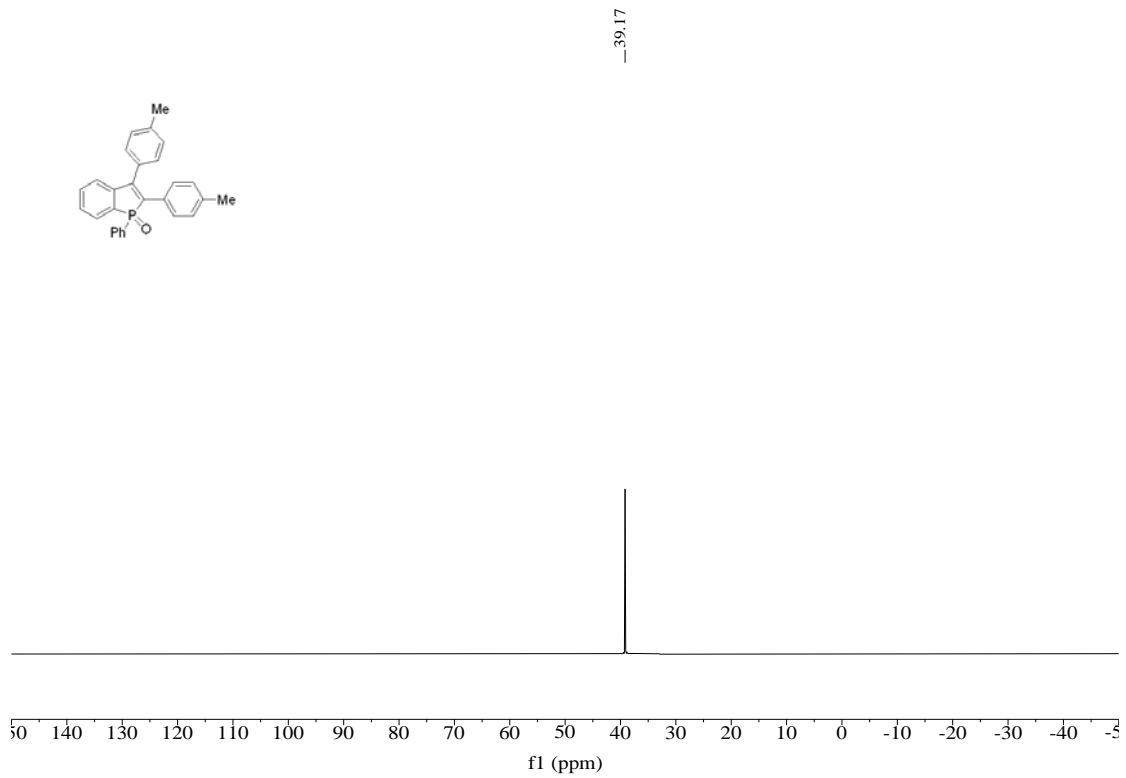

$^{31}\text{P}$  NMR ( $\text{CDCl}_3\text{-}d$ ) of **3c**

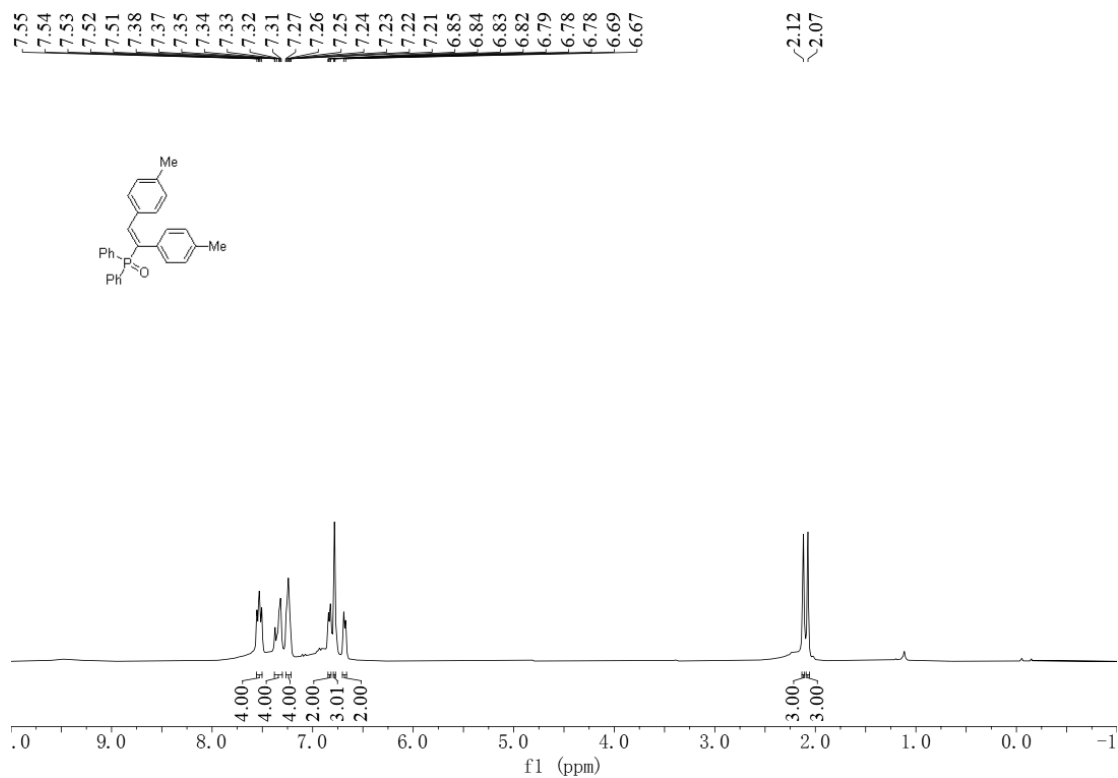

$^1\text{H}$  NMR ( $\text{CDCl}_3\text{-}d$ ) of  $3\text{c}'$

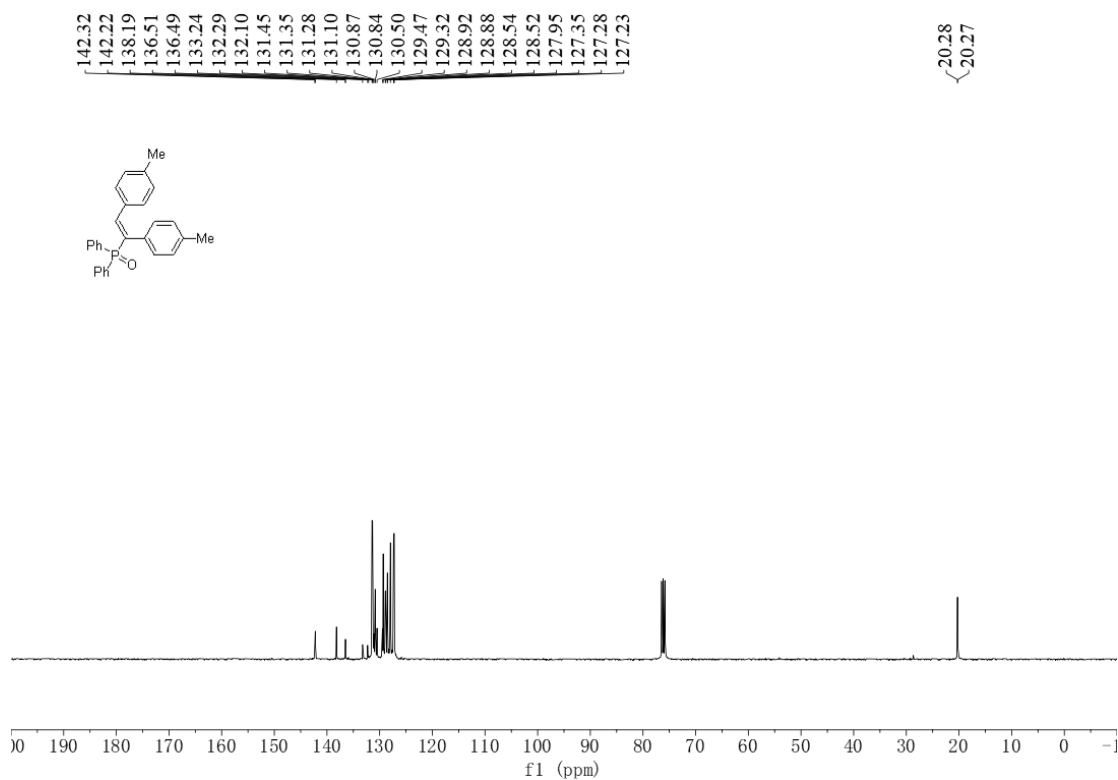

$^{13}\text{C}$  NMR ( $\text{CDCl}_3\text{-}d$ ) of  $3\text{c}'$

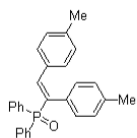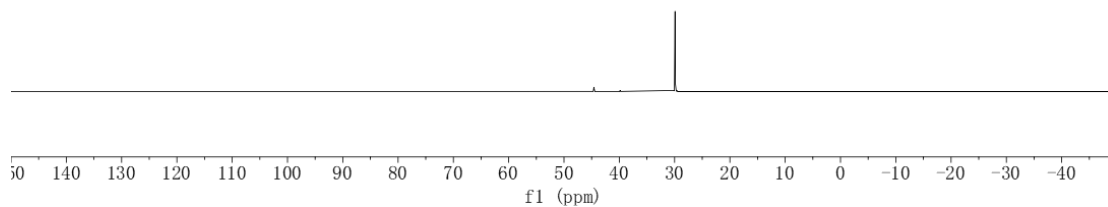

<sup>31</sup>P NMR (CDCl<sub>3</sub>-d) of 3c'

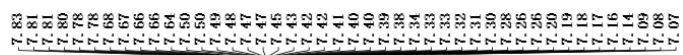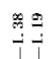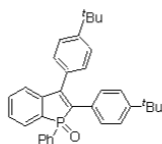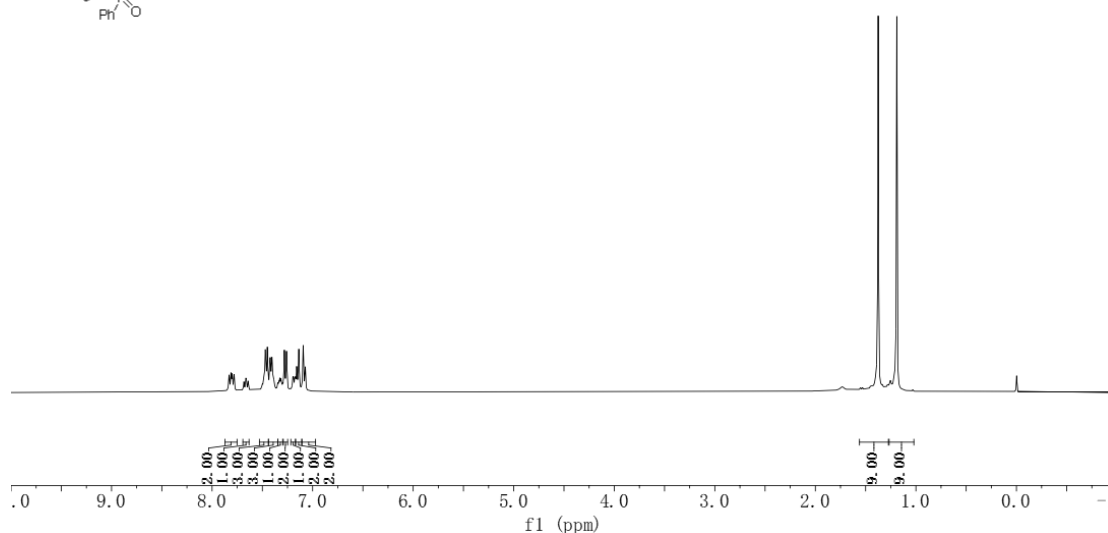

<sup>1</sup>H NMR (CDCl<sub>3</sub>-d) of 3d

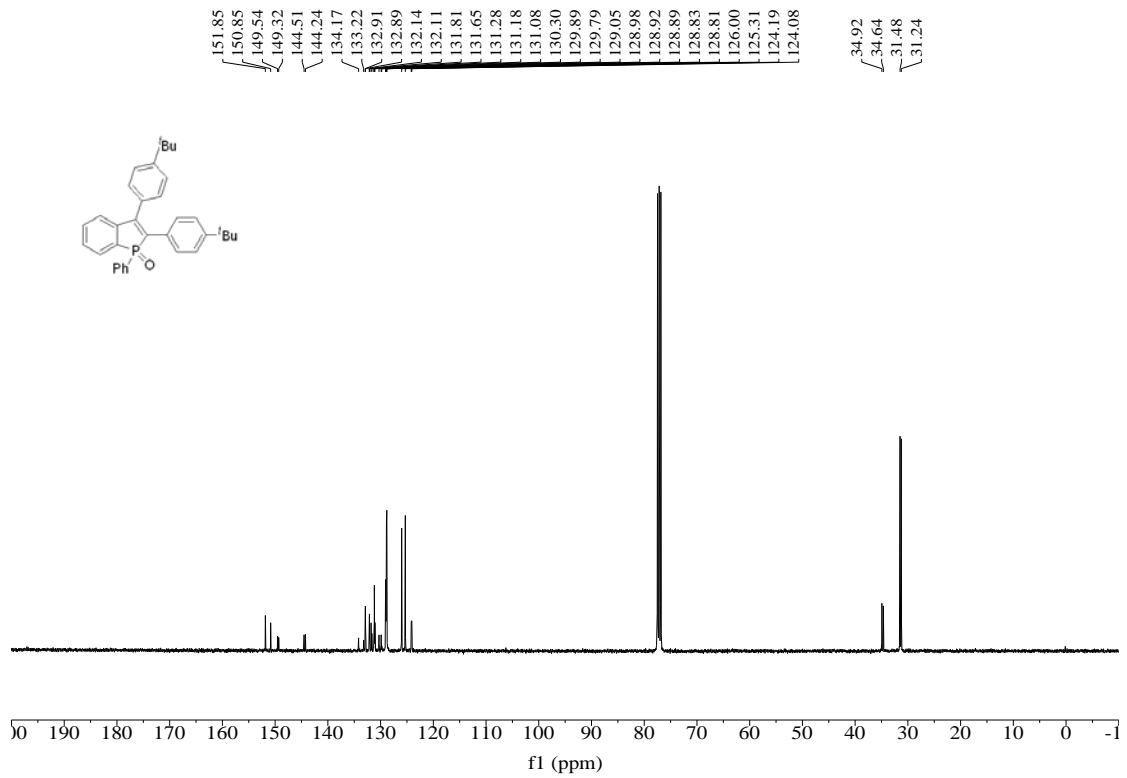

$^{13}\text{C}$  NMR ( $\text{CDCl}_3-d$ ) of **3d**

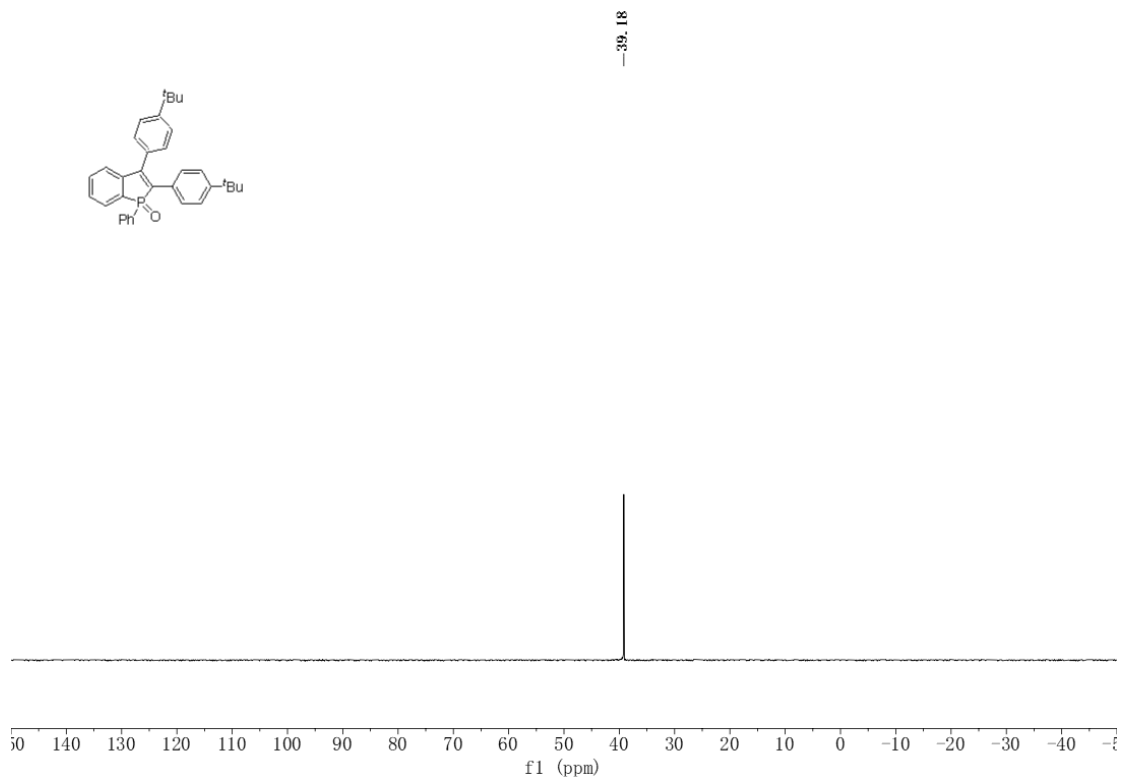

$^{31}\text{P}$  NMR ( $\text{CDCl}_3-d$ ) of **3d**

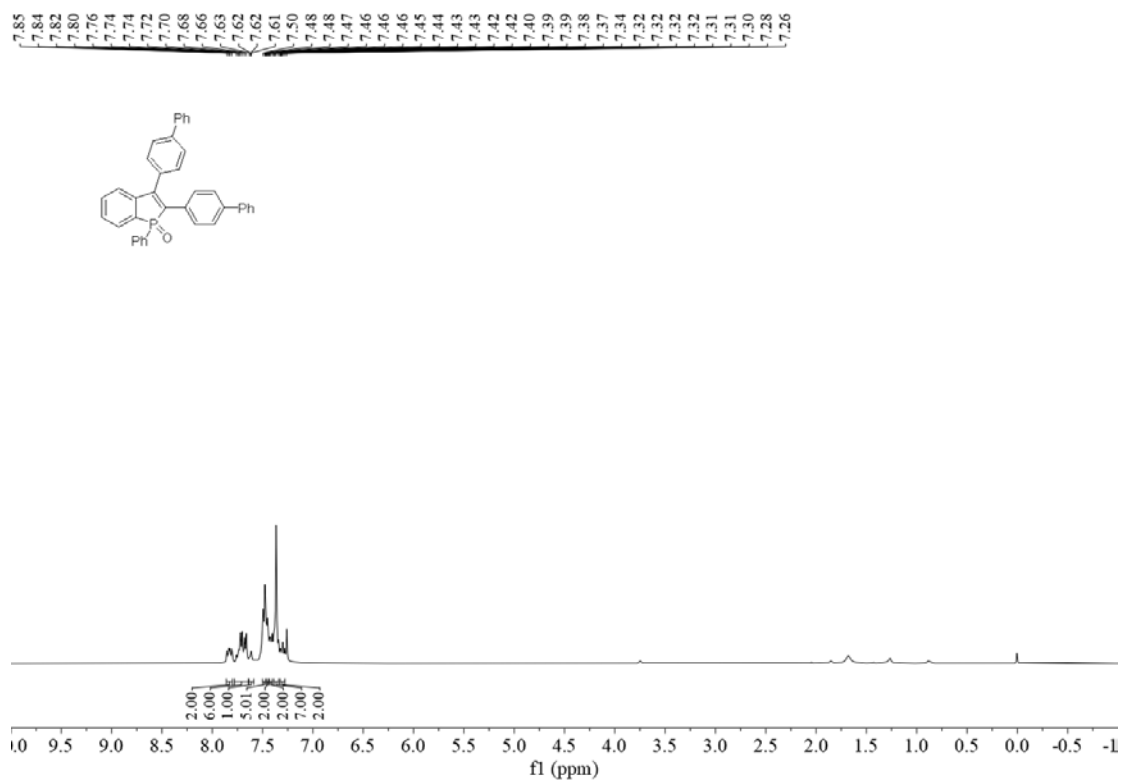

$^1\text{H NMR}$  ( $\text{CDCl}_3$ -*d*) of **3e**

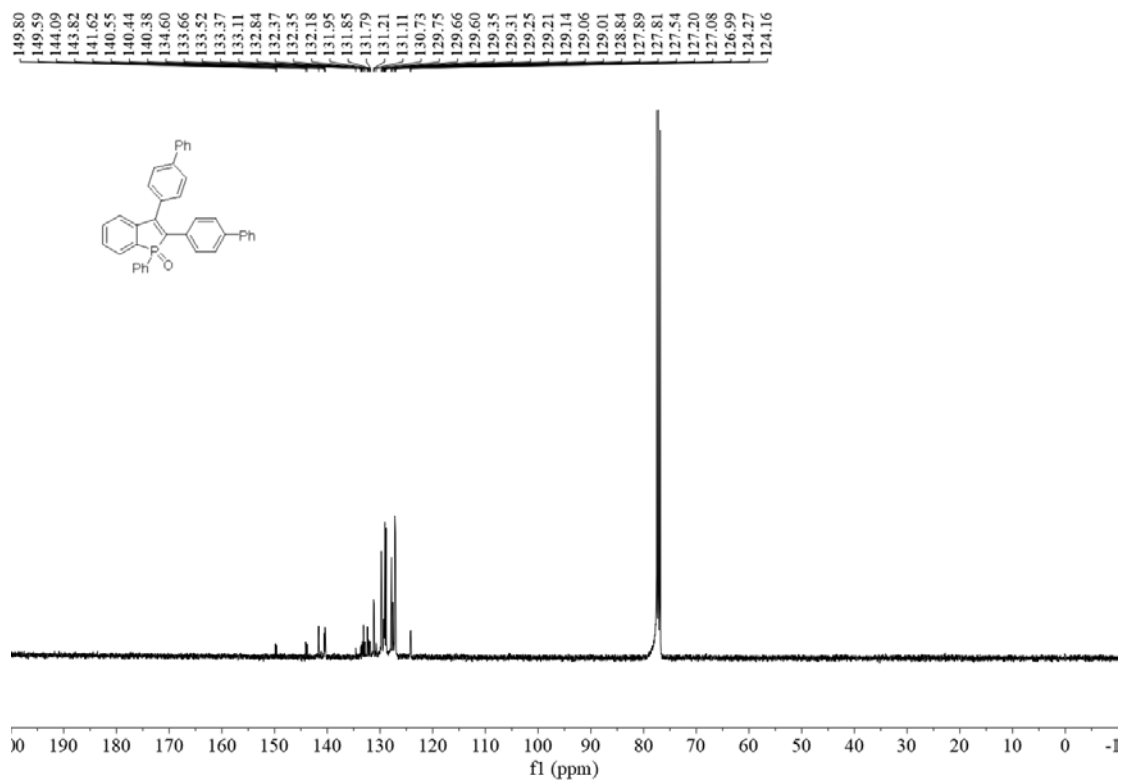

$^{13}\text{C NMR}$  ( $\text{CDCl}_3$ -*d*) of **3e**

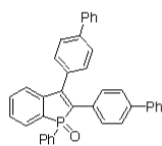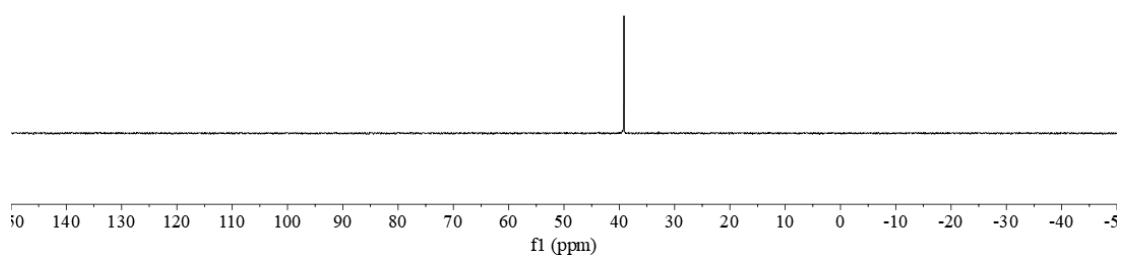

$^{31}\text{P}$  NMR ( $\text{CDCl}_3-d$ ) of **3e**

7.75  
7.73  
7.72  
7.70  
7.69  
7.49  
7.48  
7.46  
7.42  
7.40  
7.40  
7.39  
7.38  
7.37  
7.31  
7.30  
7.29  
7.28  
7.26  
7.22  
7.20  
7.18  
7.16  
7.14  
7.12  
6.83  
6.81  
6.79

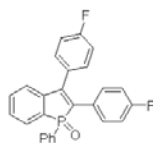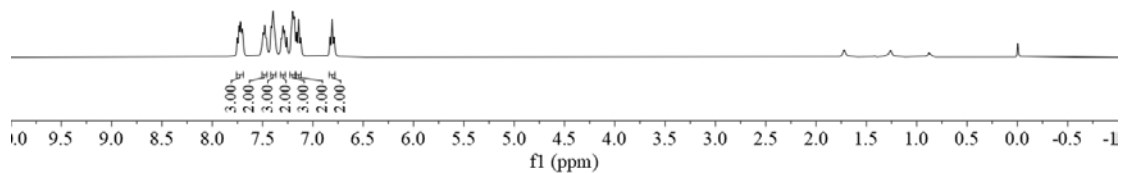

$^1\text{H}$  NMR ( $\text{CDCl}_3-d$ ) of **3f**

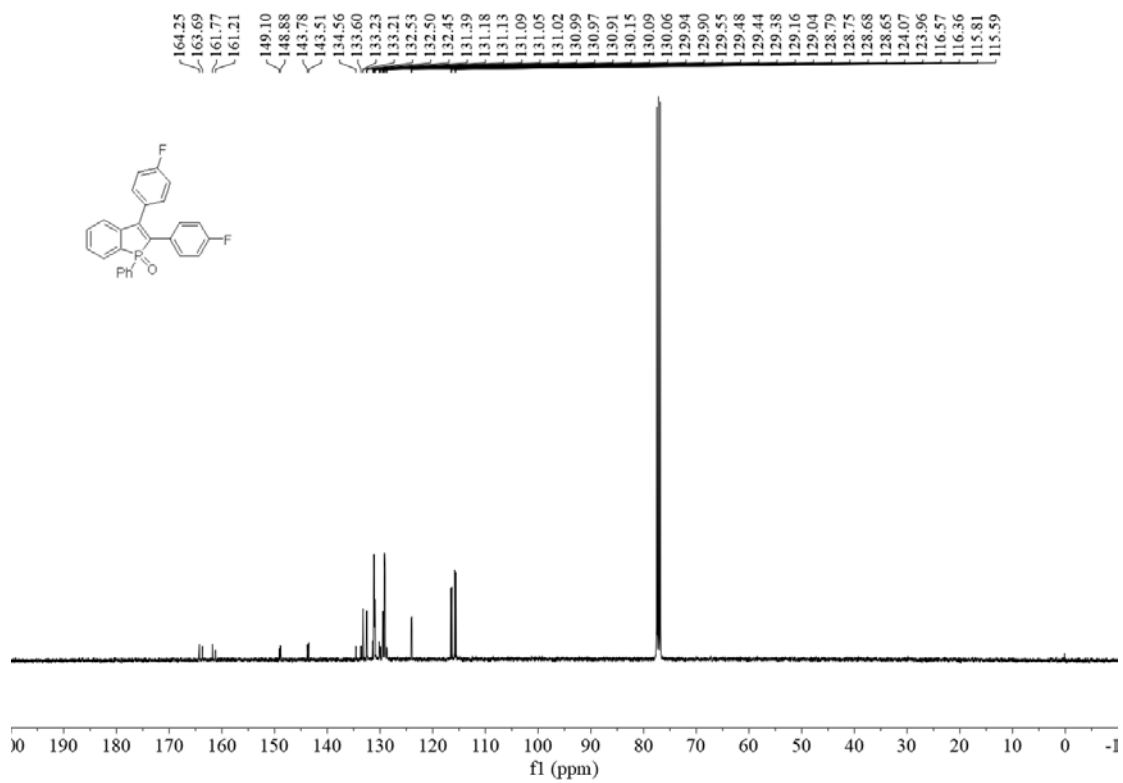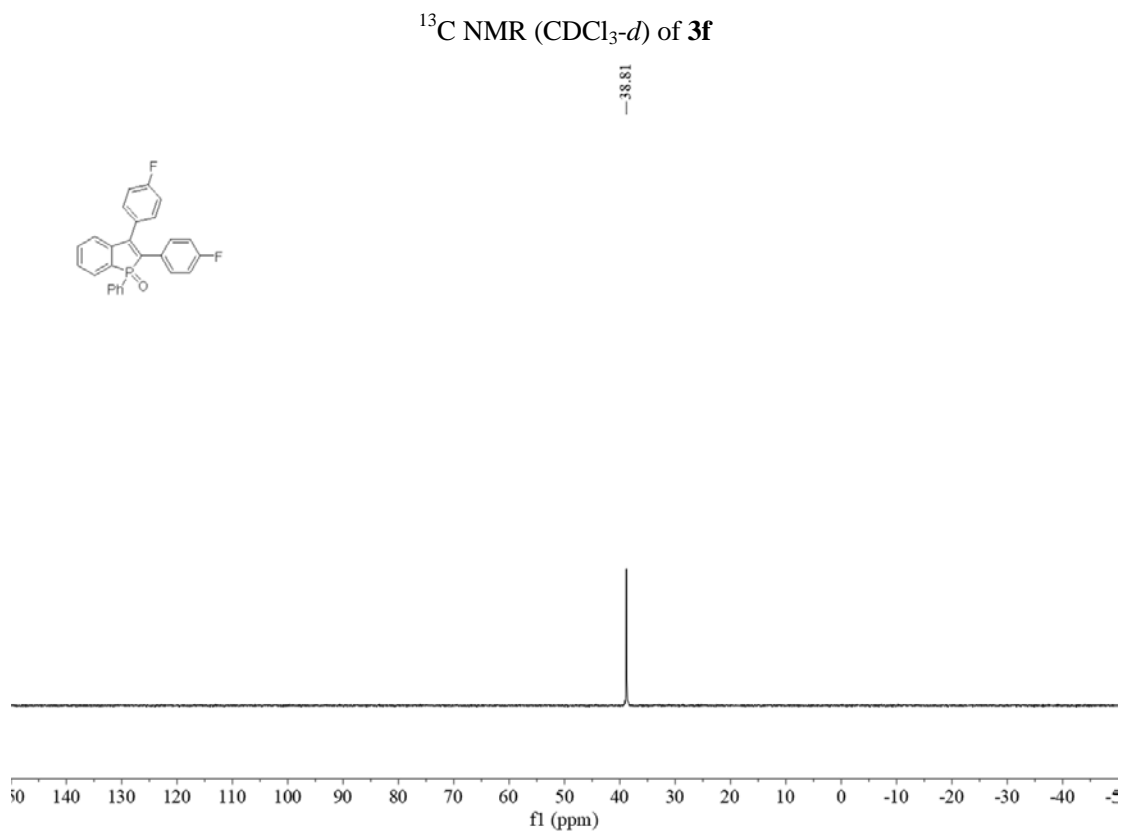



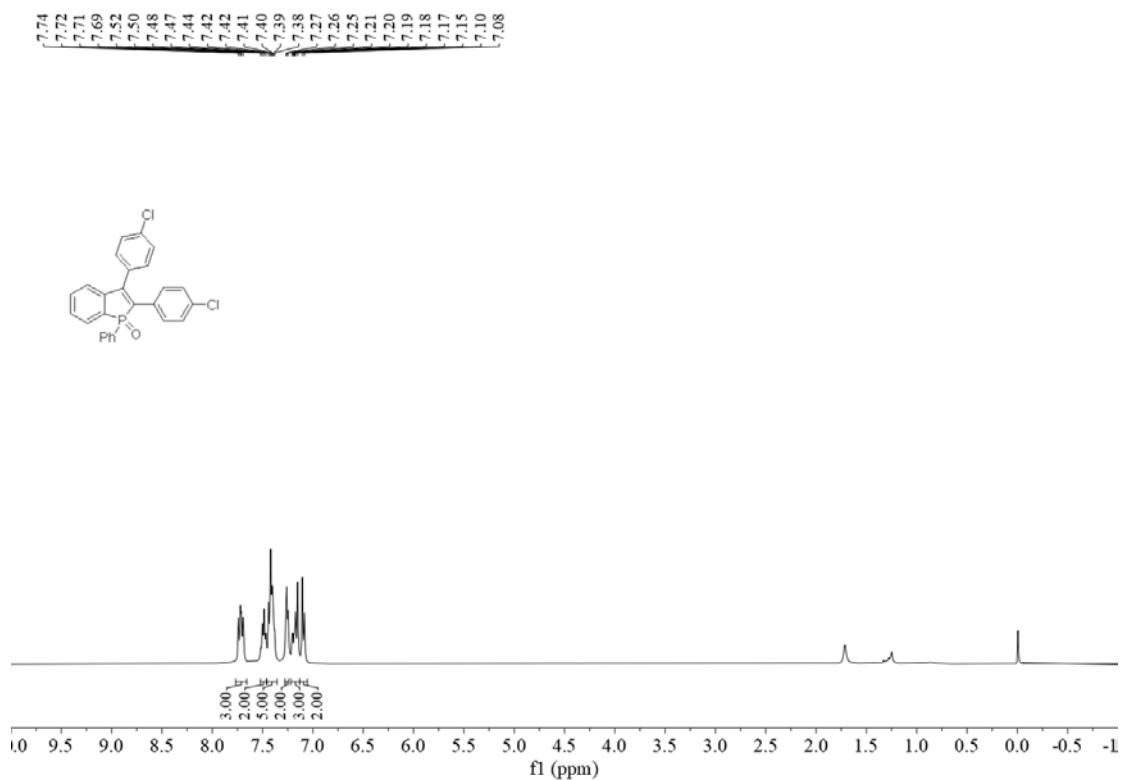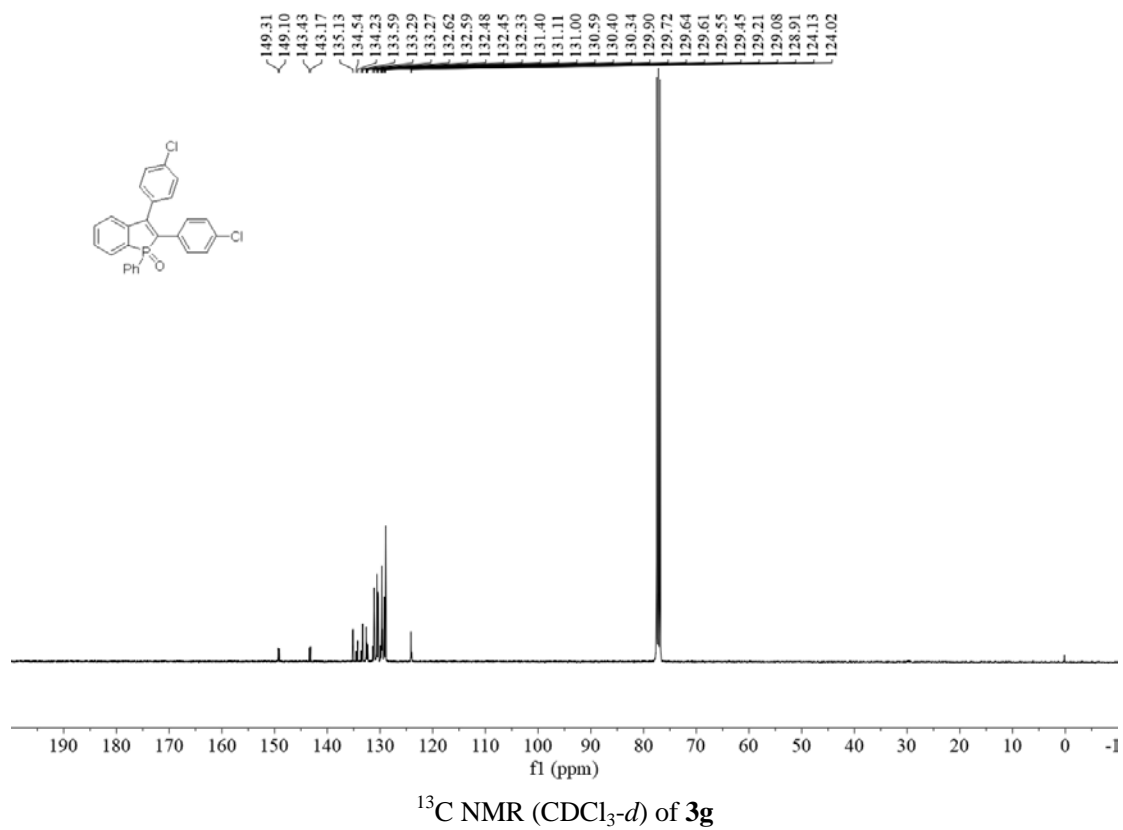

-38.92

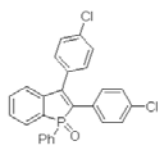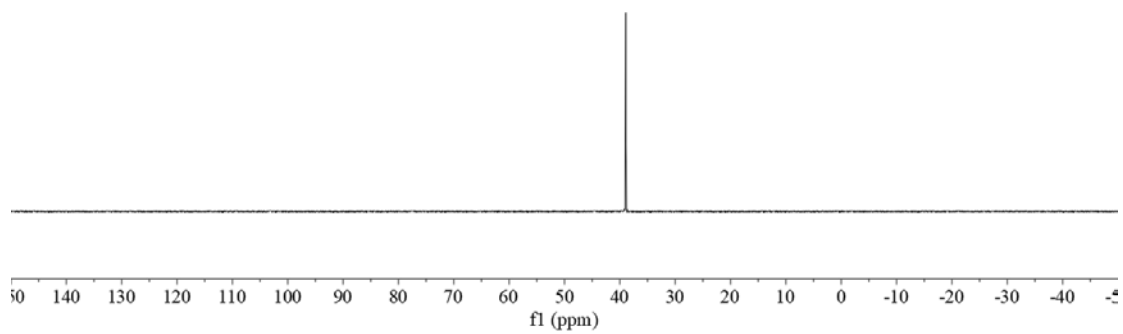

$^{31}\text{P}$  NMR ( $\text{CDCl}_3$ -*d*) of **3g**

7.73  
7.71  
7.70  
7.69  
7.68  
7.59  
7.57  
7.51  
7.49  
7.48  
7.46  
7.42  
7.41  
7.40  
7.39  
7.37  
7.26  
7.24  
7.20  
7.18  
7.11  
7.09

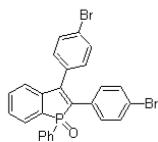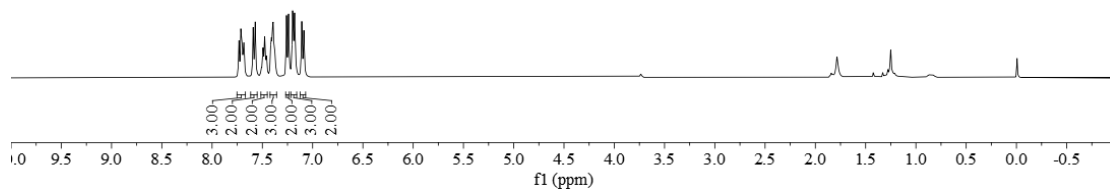

$^1\text{H}$  NMR ( $\text{CDCl}_3$ -*d*) of **3h**

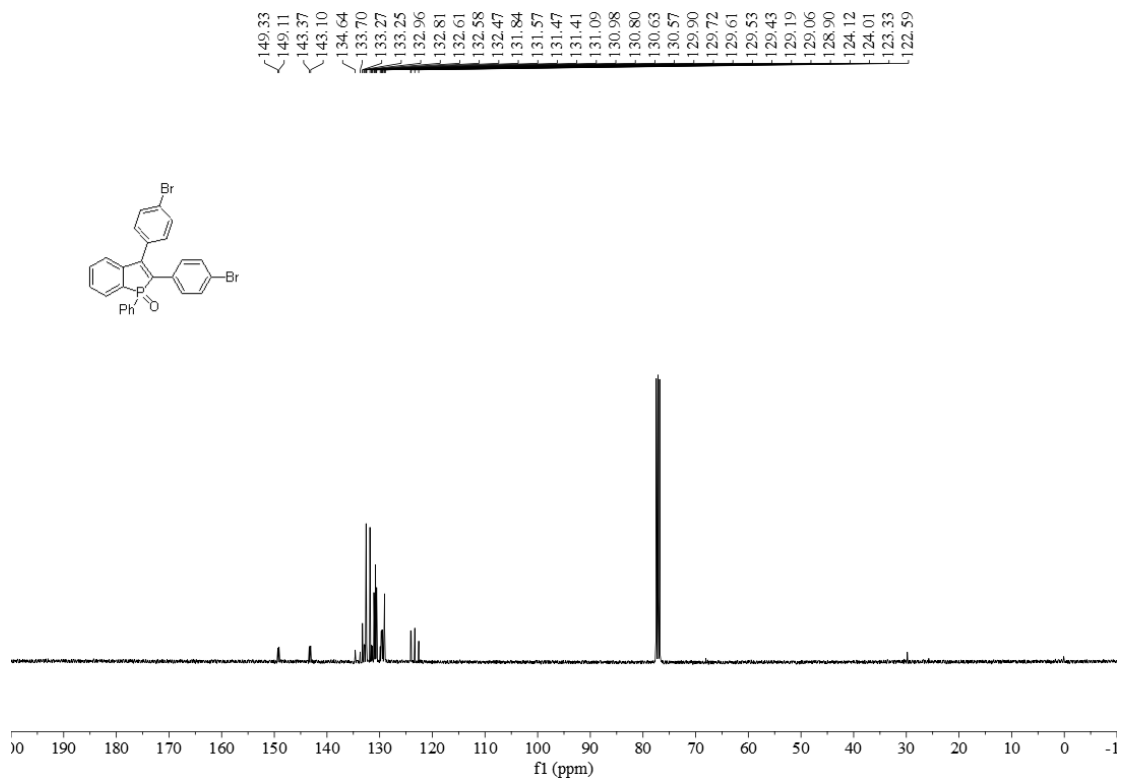

$^{13}\text{C}$  NMR ( $\text{CDCl}_3$ -*d*) of **3h**

38.78

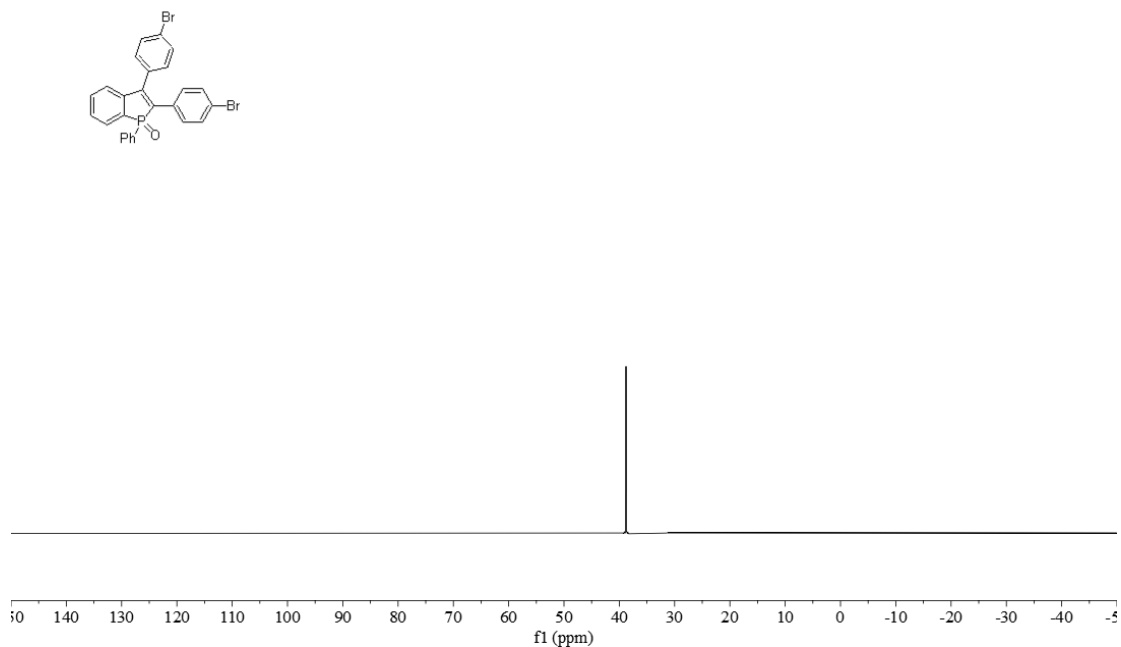

$^{31}\text{P}$  NMR ( $\text{CDCl}_3$ -*d*) of **3h**

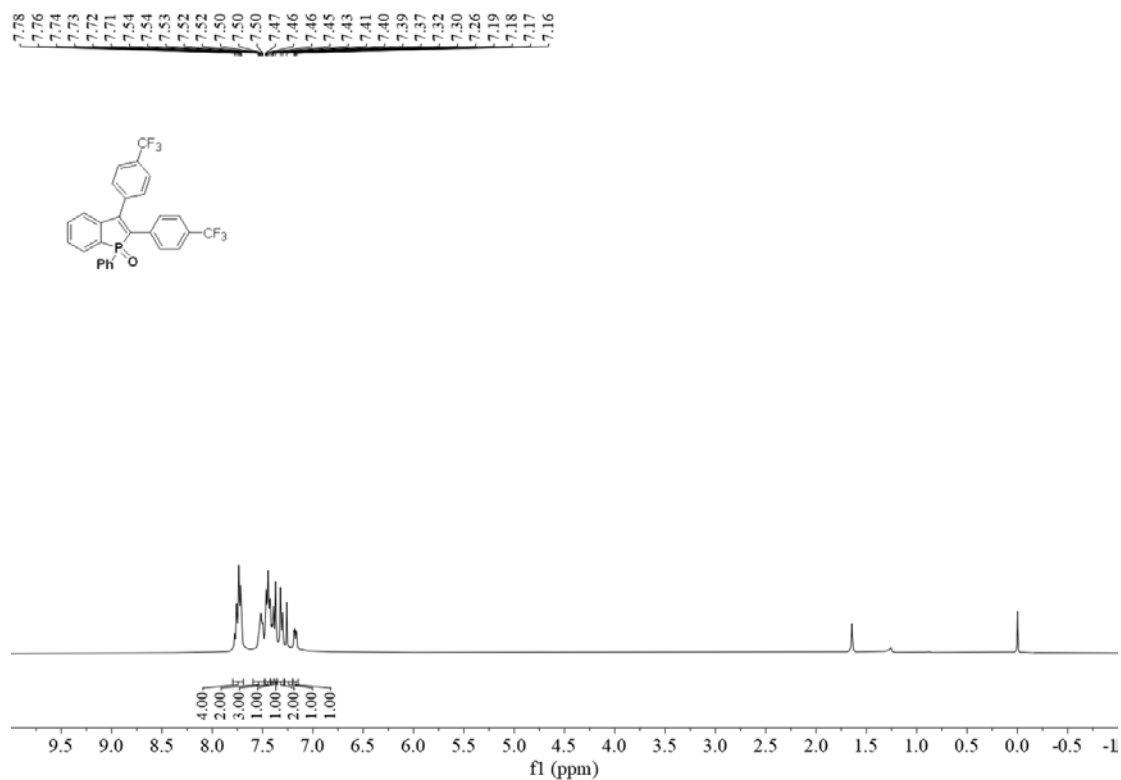

$^1\text{H NMR}$  ( $\text{CDCl}_3$ -*d*) of **3i**

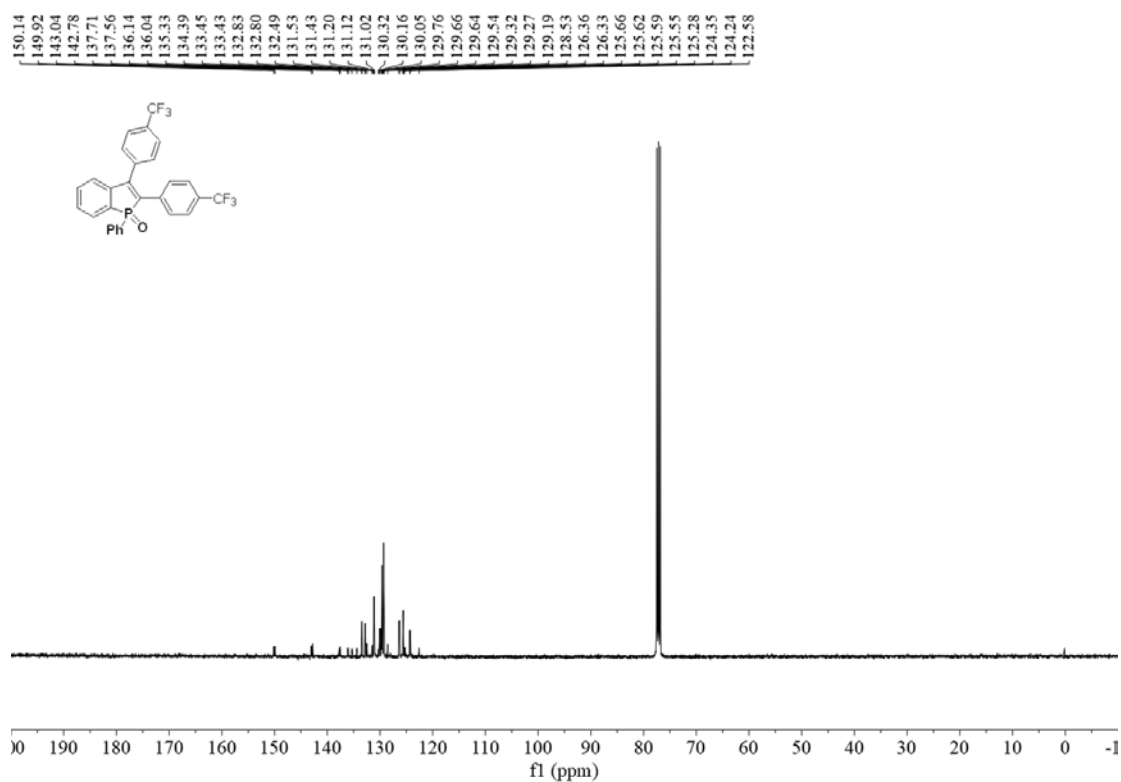

$^{13}\text{C NMR}$  ( $\text{CDCl}_3$ -*d*) of **3i**

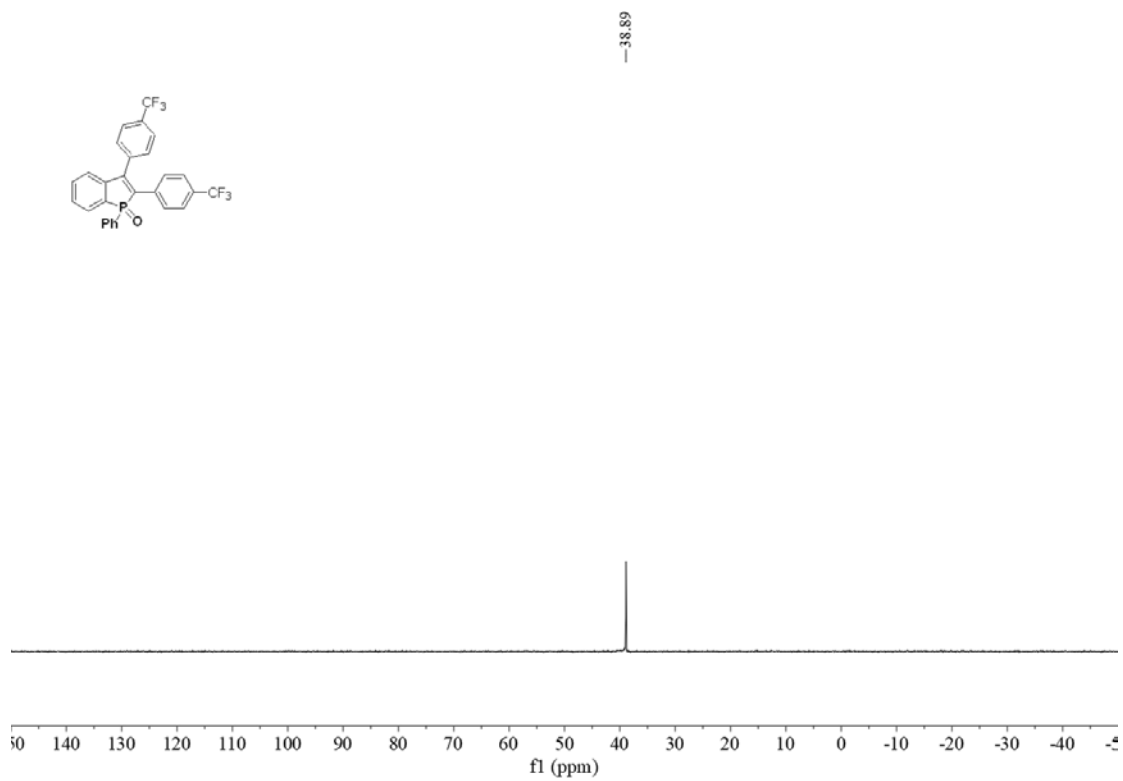

$^{31}\text{P}$  NMR ( $\text{CDCl}_3$ -*d*) of **3i**

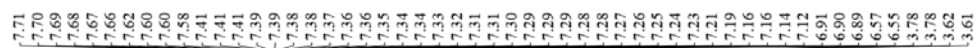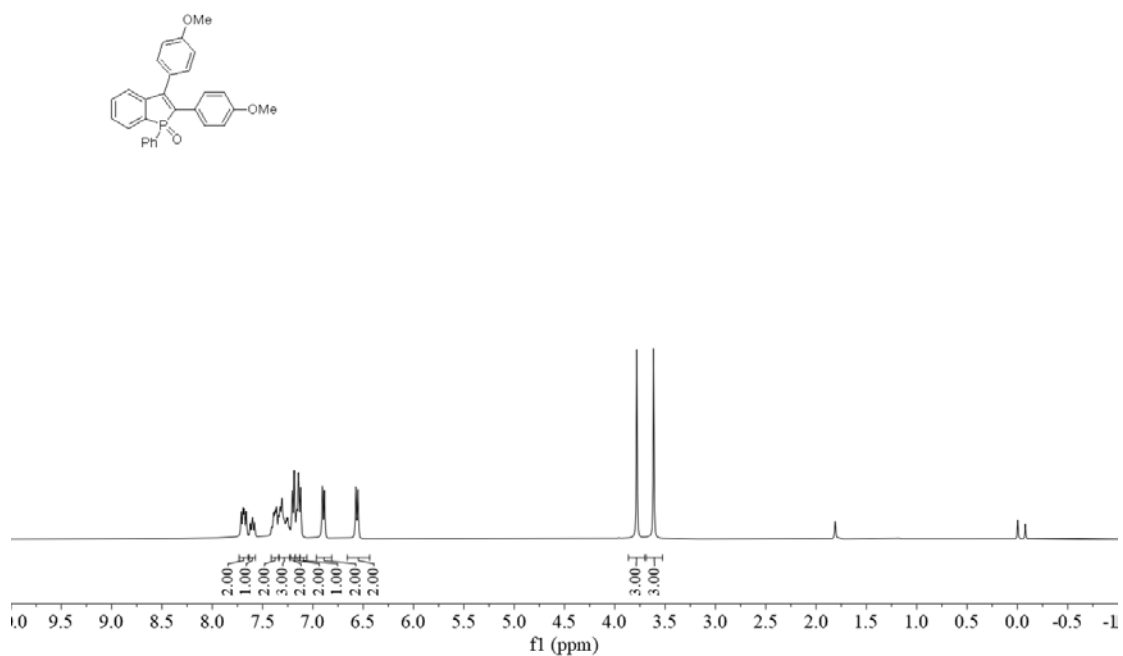

$^1\text{H}$  NMR ( $\text{CDCl}_3$ -*d*) of **3j**

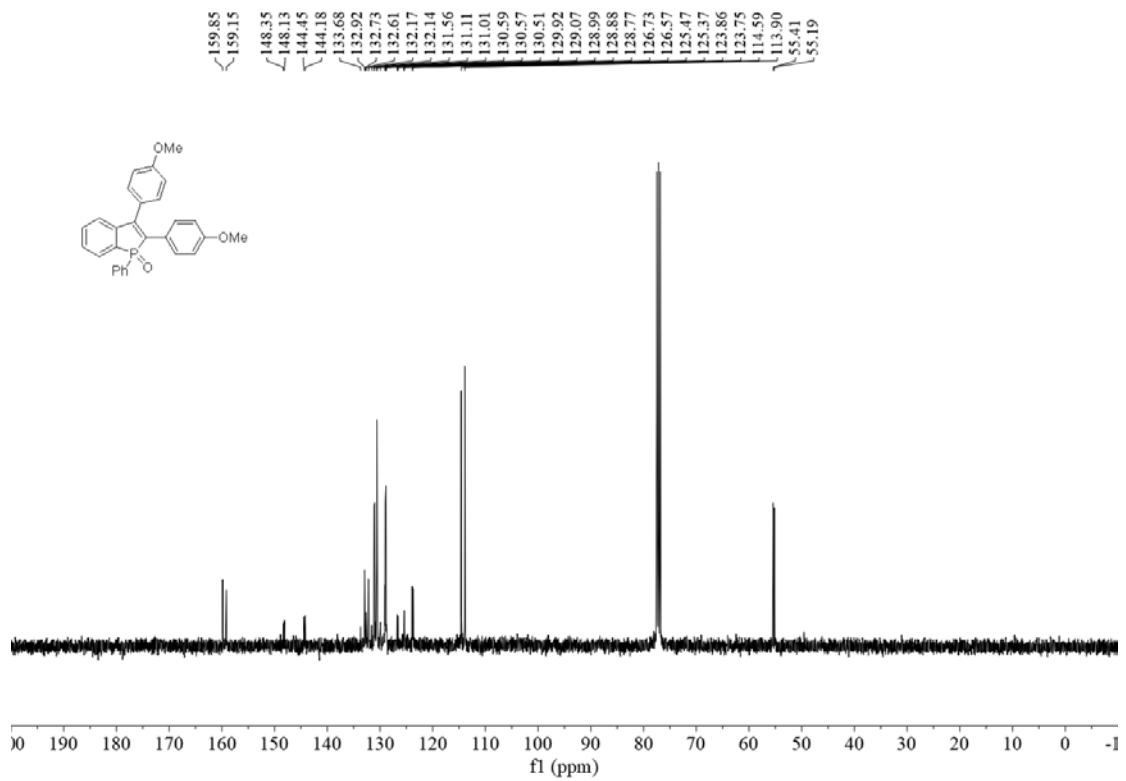

$^{13}\text{C}$  NMR ( $\text{CDCl}_3$ -*d*) of **3j**

—39.15

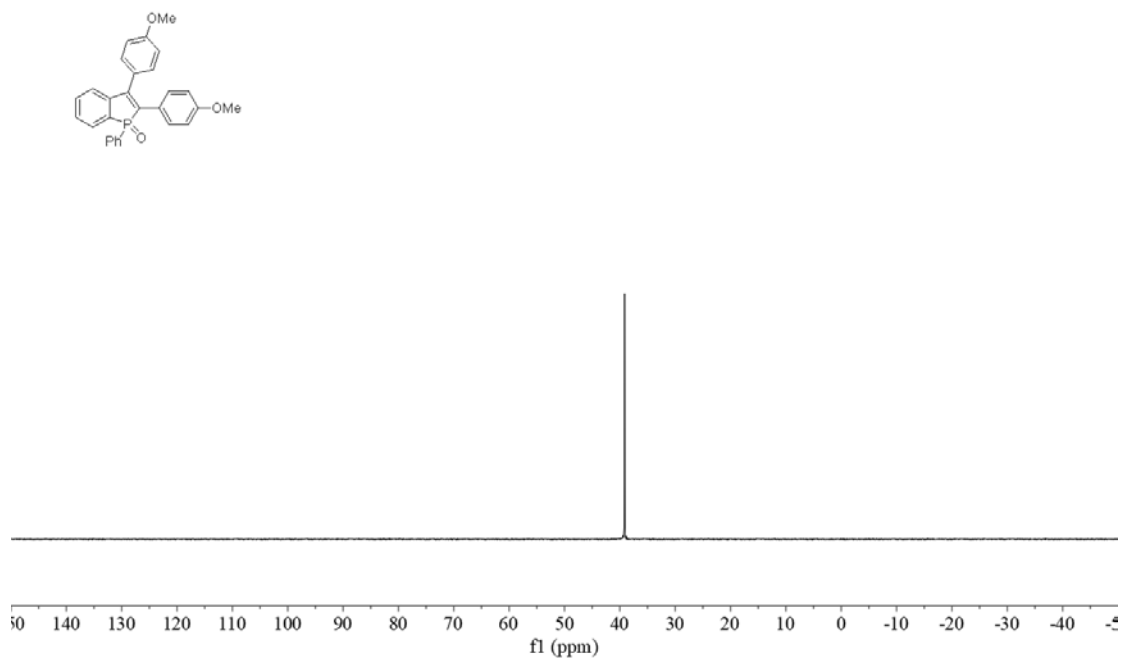

$^{31}\text{P}$  NMR ( $\text{CDCl}_3$ -*d*) of **3j**

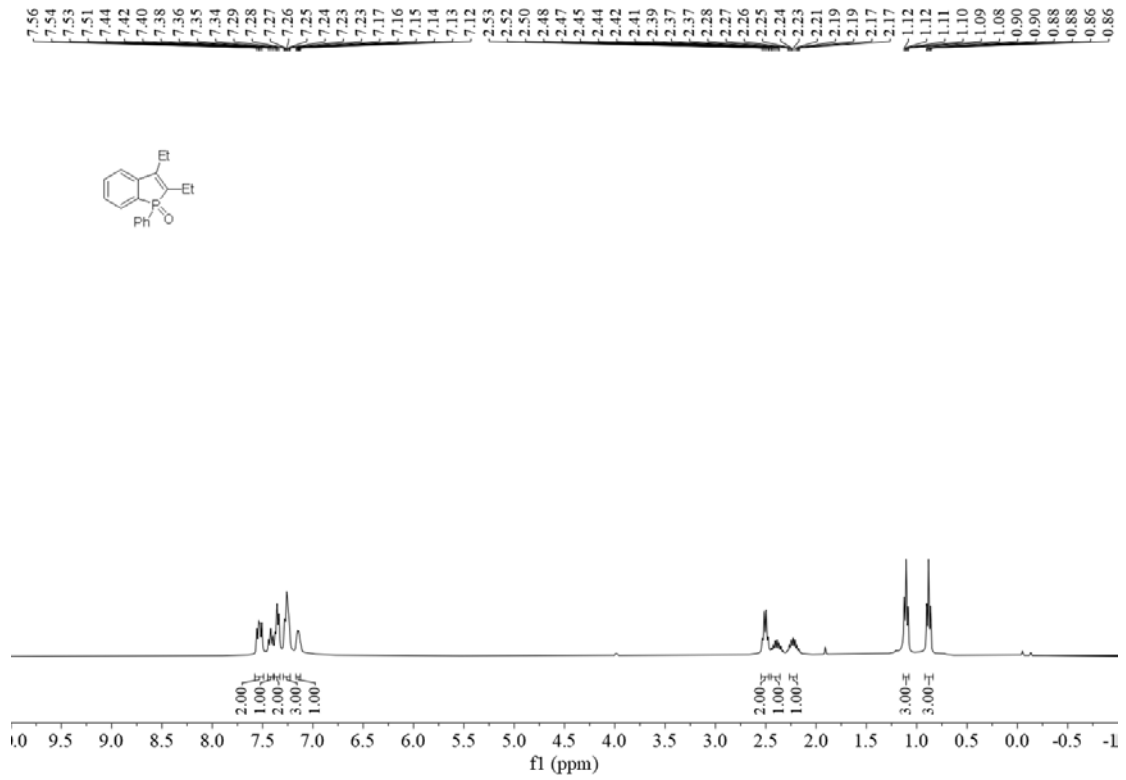

<sup>1</sup>H NMR (CDCl<sub>3</sub>-d) of **3k**

151.69  
151.49  
143.46  
143.17  
135.74  
134.78  
132.92  
132.88  
132.86  
131.95  
131.93  
131.87  
131.04  
130.93  
130.83  
129.87  
128.81  
128.72  
128.69  
128.63  
128.36  
128.25  
121.35  
121.24

19.73  
19.60  
19.12  
19.01  
14.01  
13.99  
13.18  
13.16

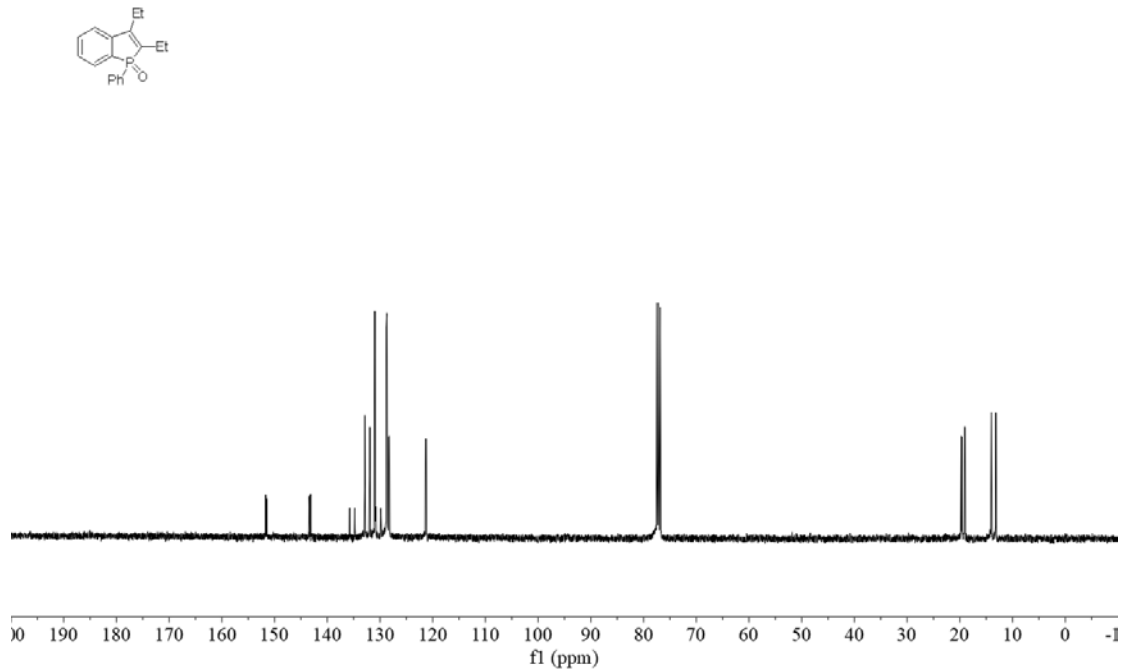

<sup>13</sup>C NMR (CDCl<sub>3</sub>-d) of **3k**

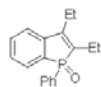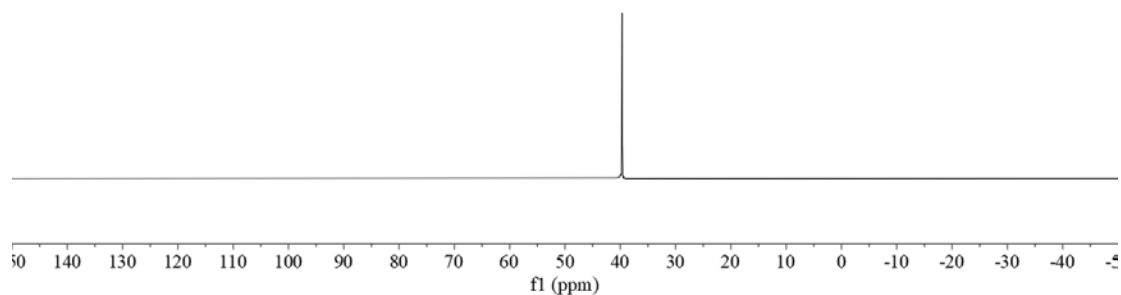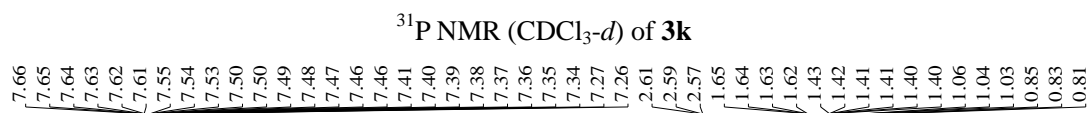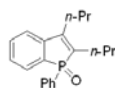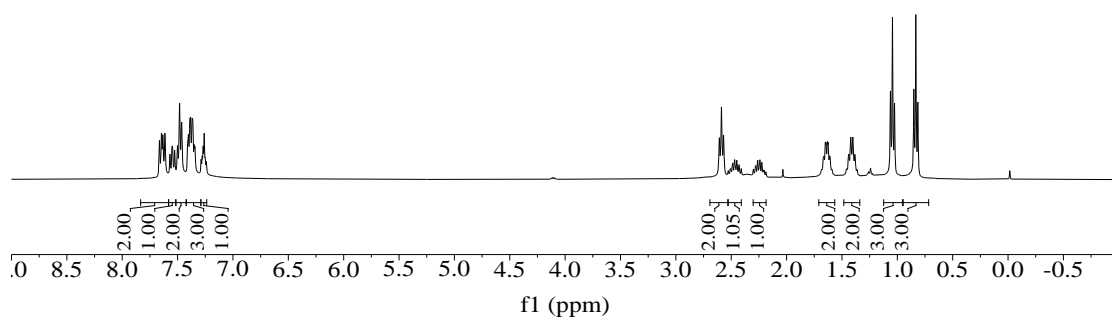



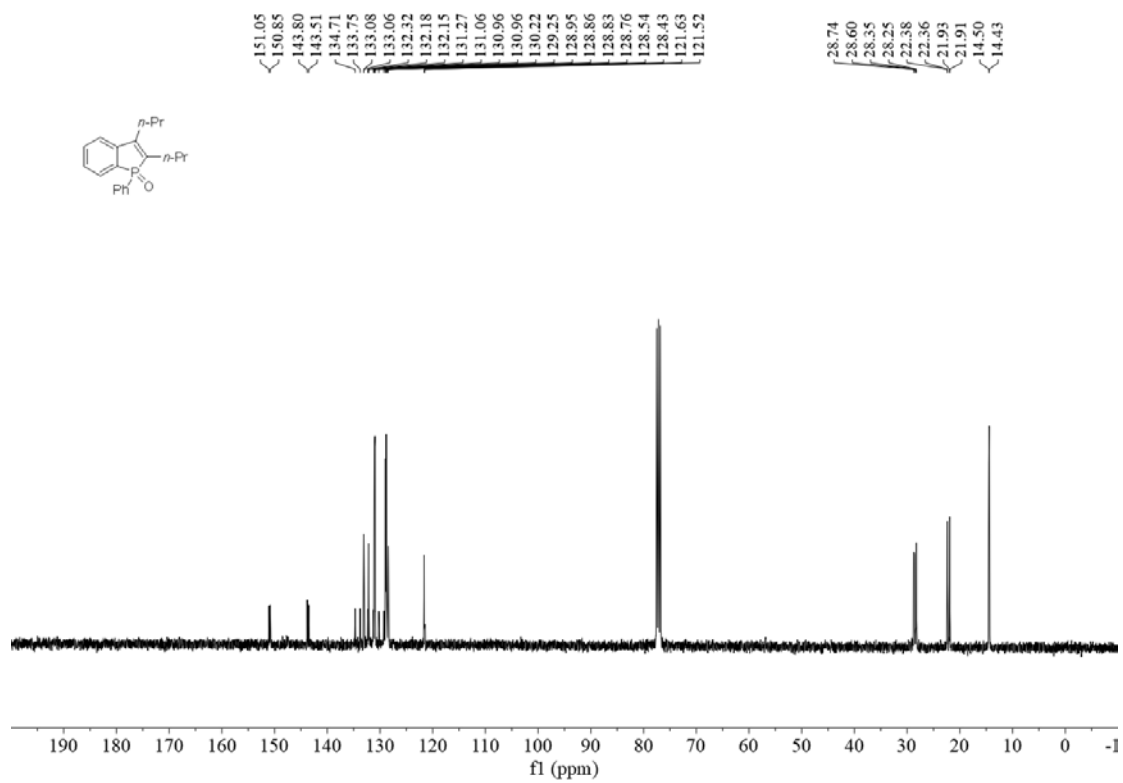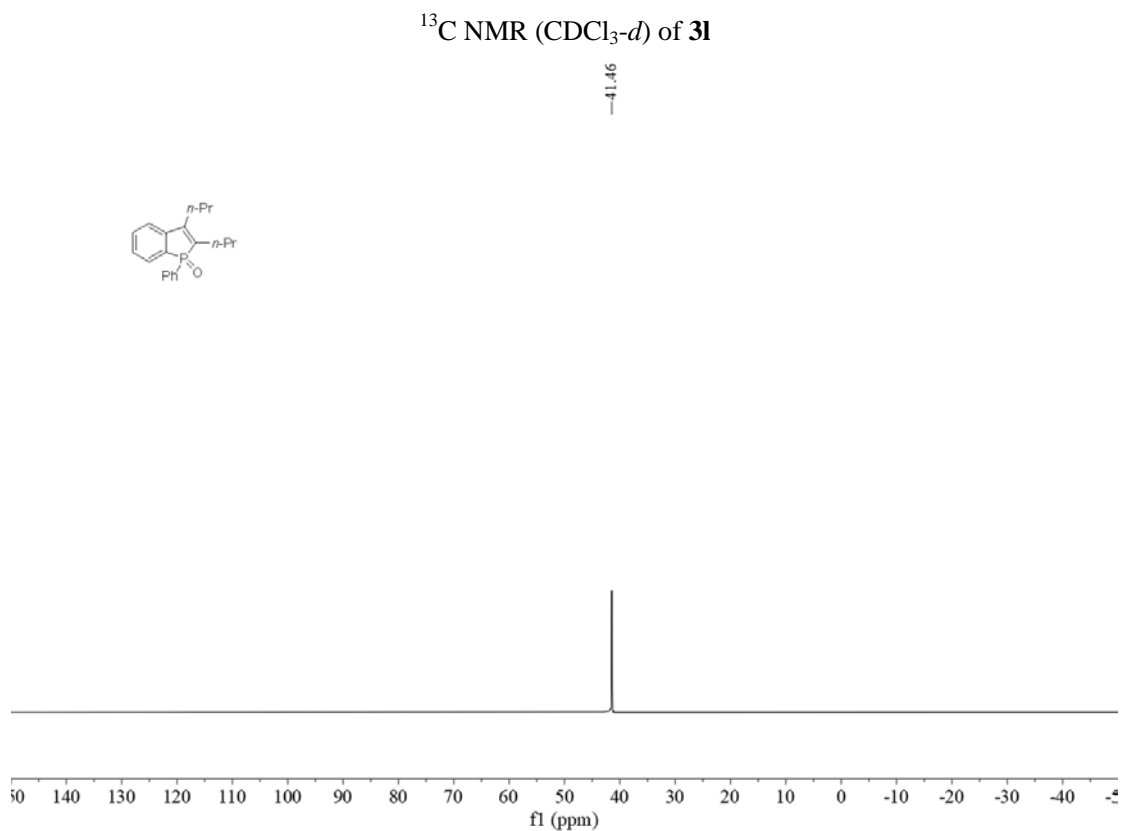

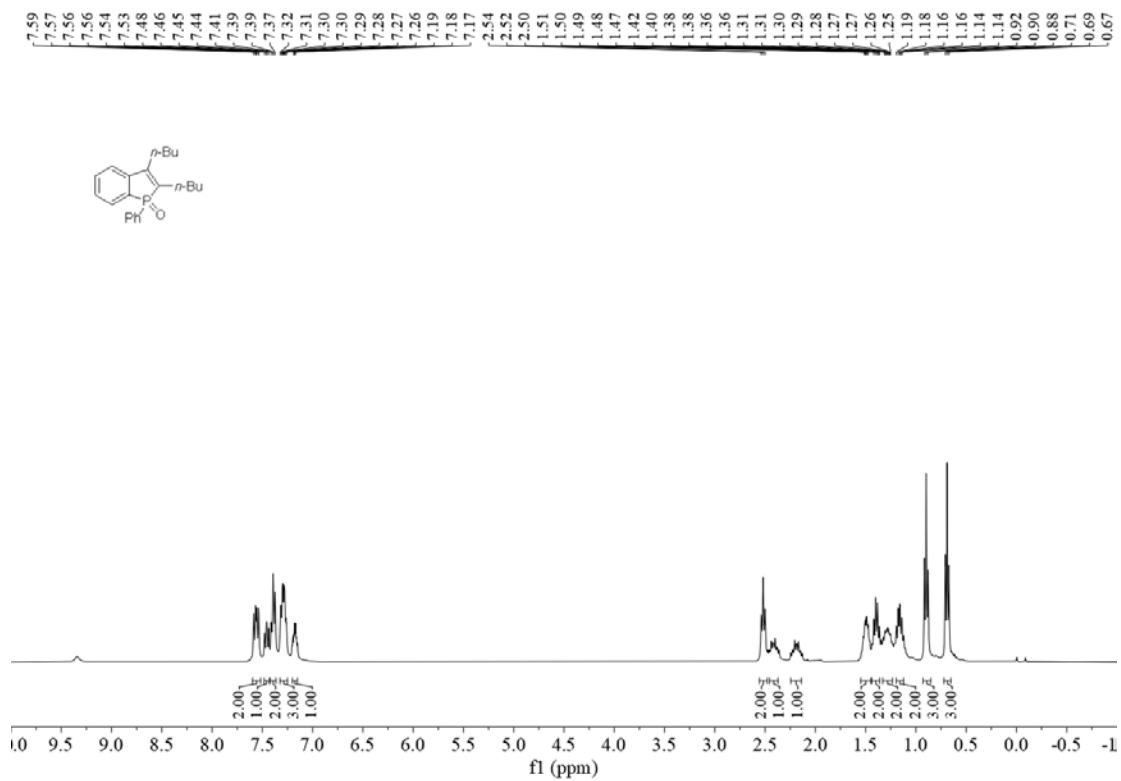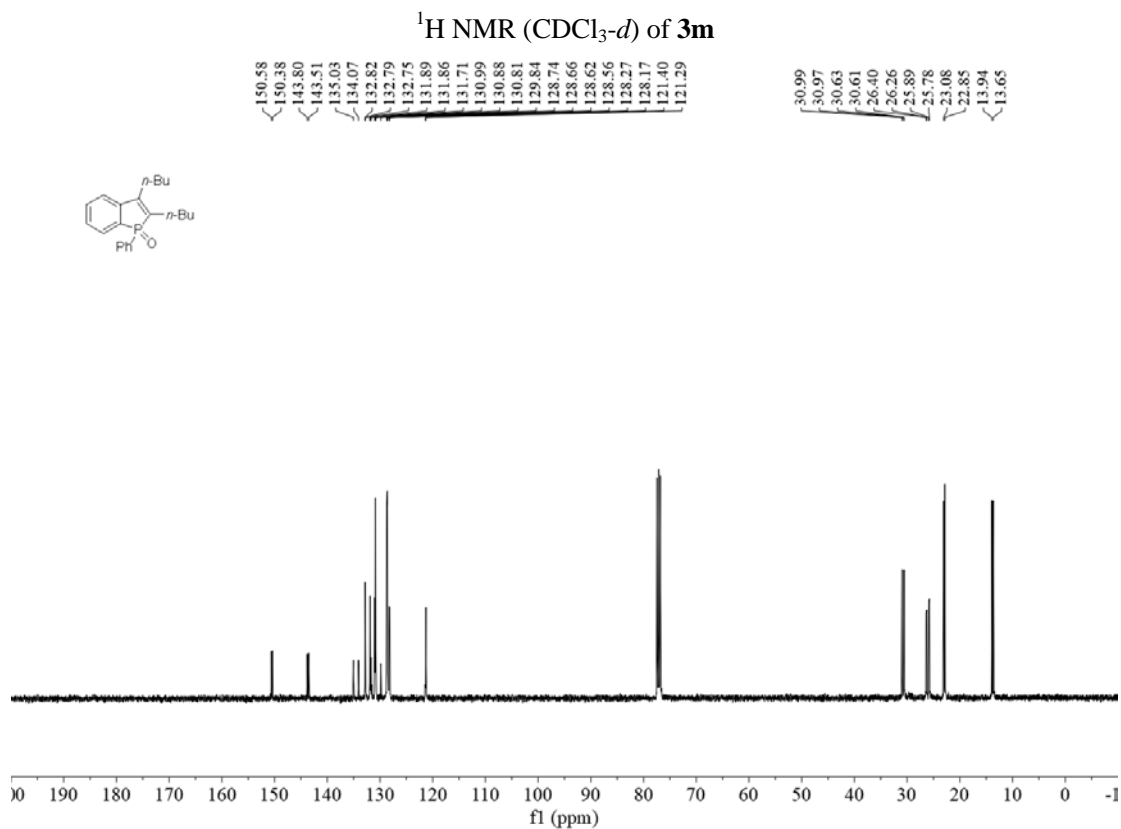

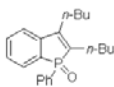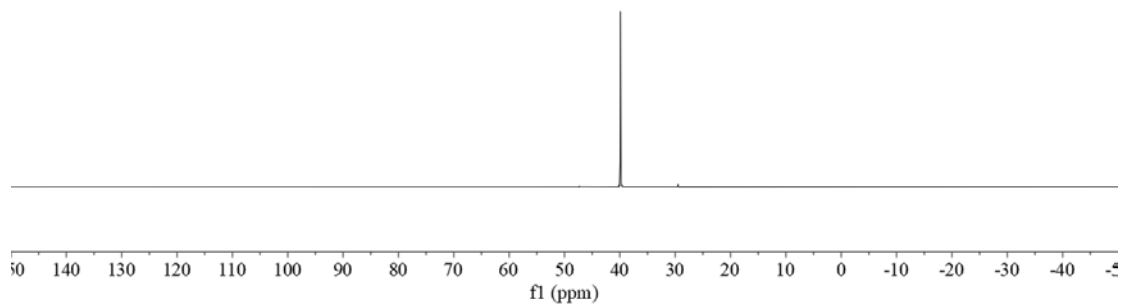

<sup>31</sup>P NMR (CDCl<sub>3</sub>-d) of **3m**

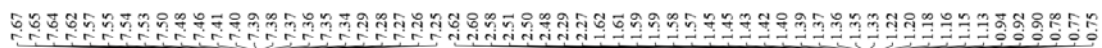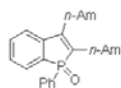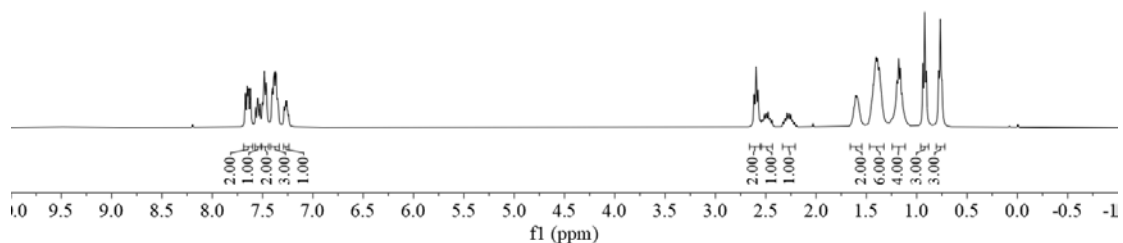

<sup>1</sup>H NMR (CDCl<sub>3</sub>-d) of **3m**

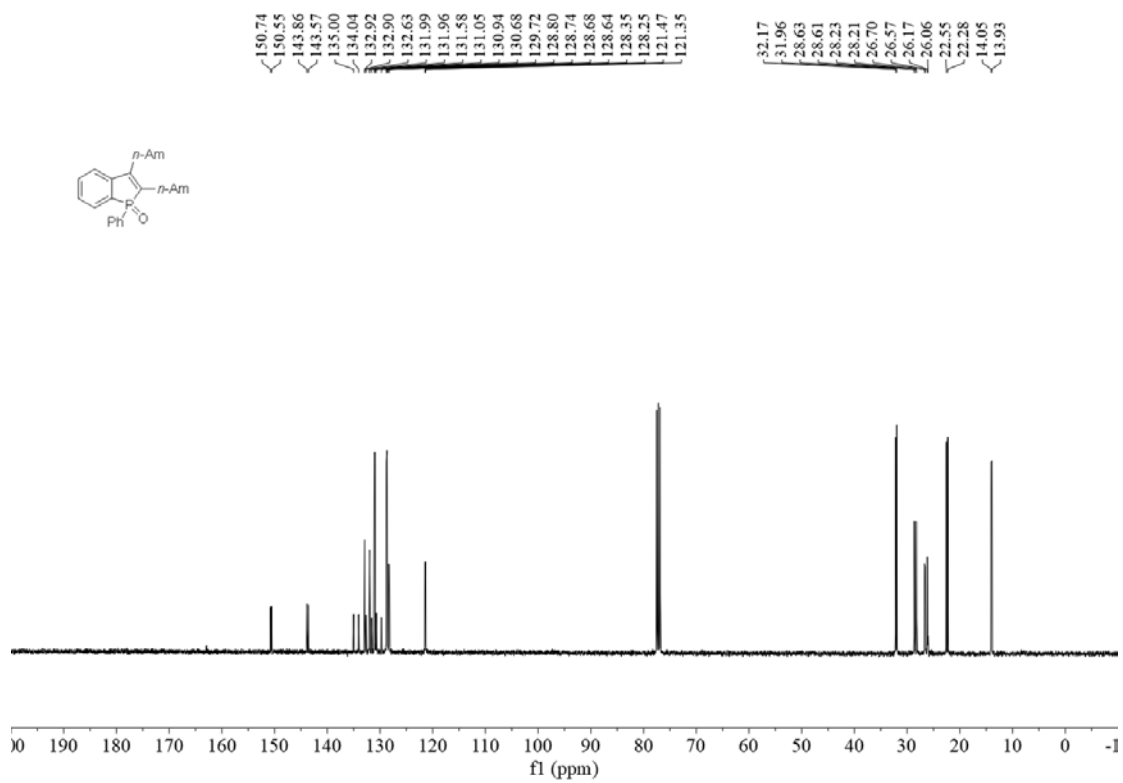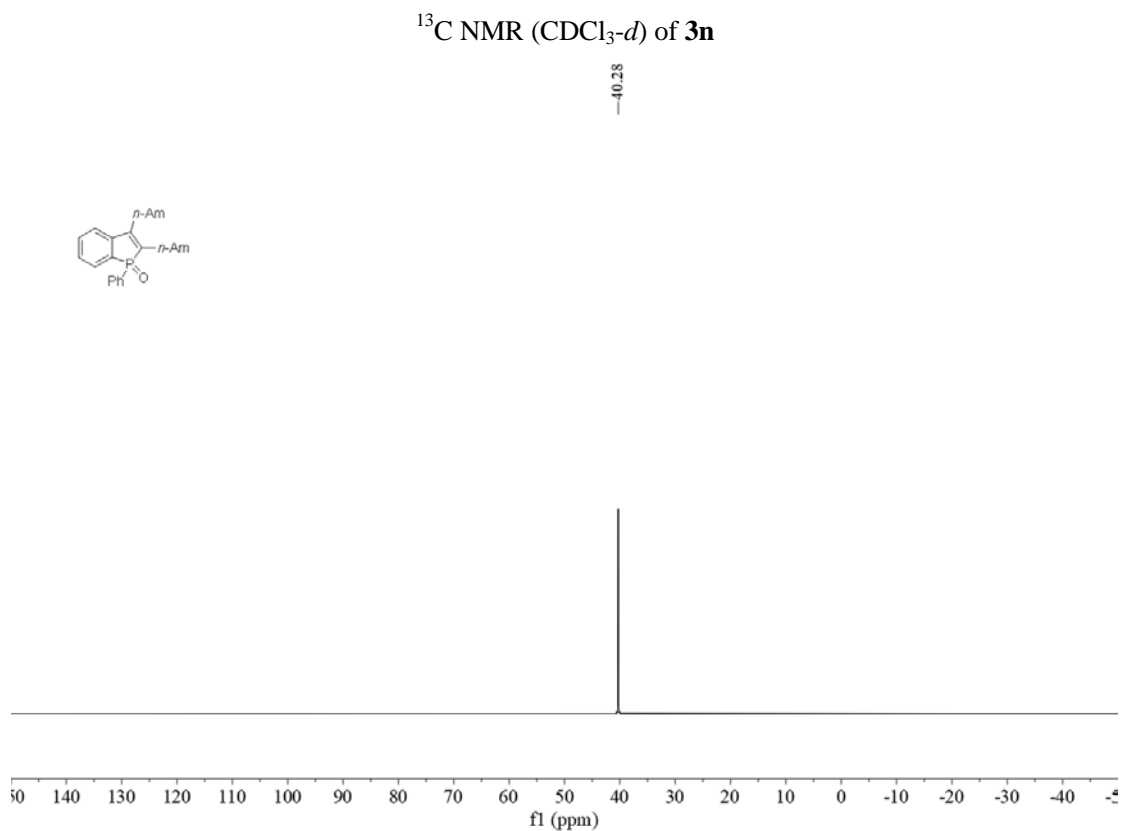

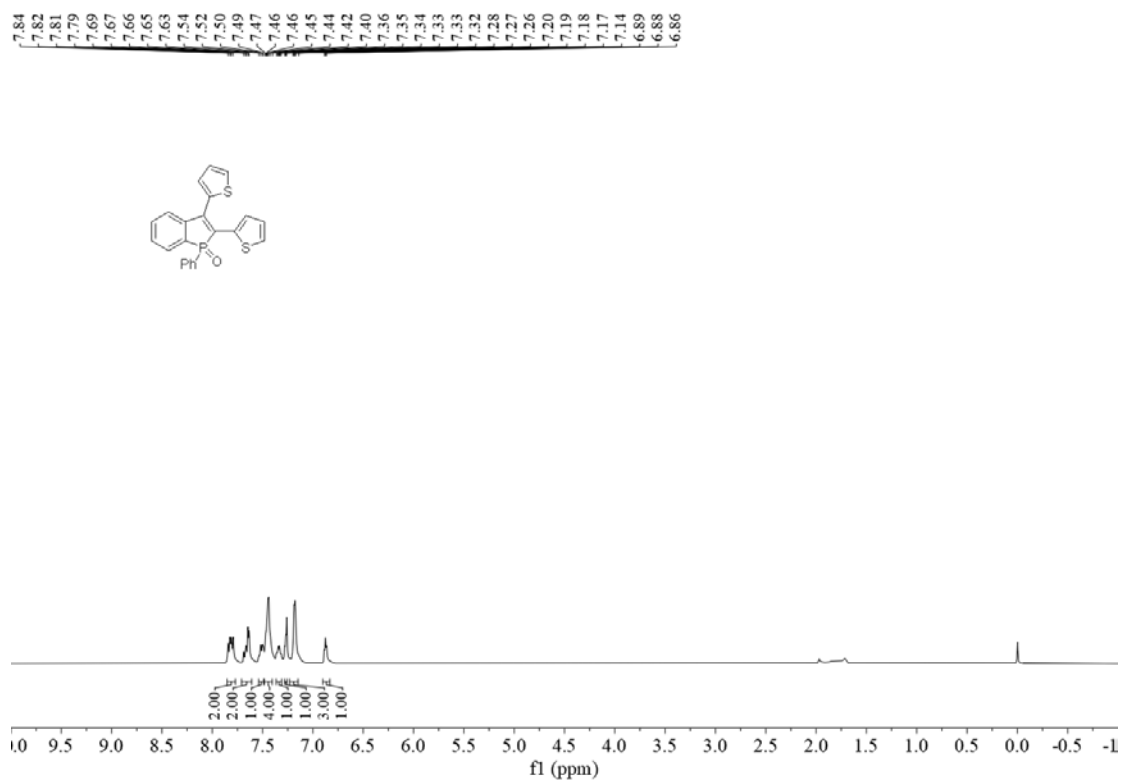

$^1\text{H}$  NMR ( $\text{CDCl}_3$ -*d*) of **3o**

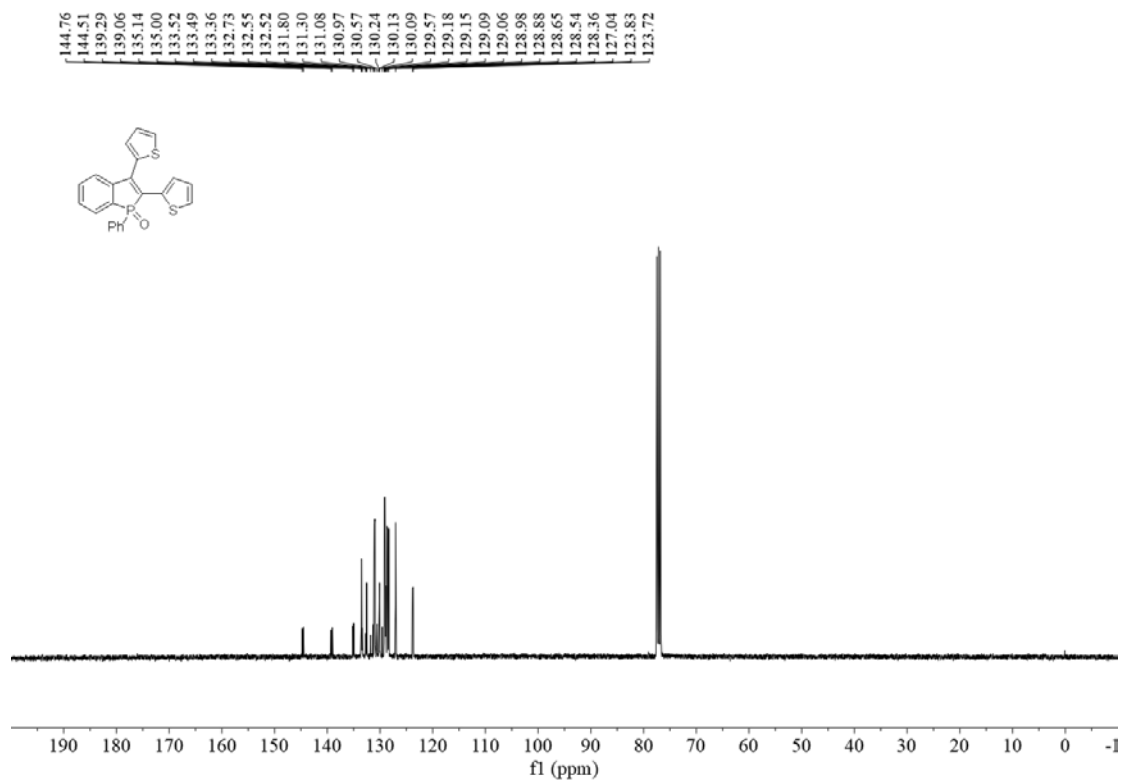

$^{13}\text{C}$  NMR ( $\text{CDCl}_3$ -*d*) of **3o**

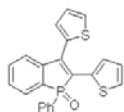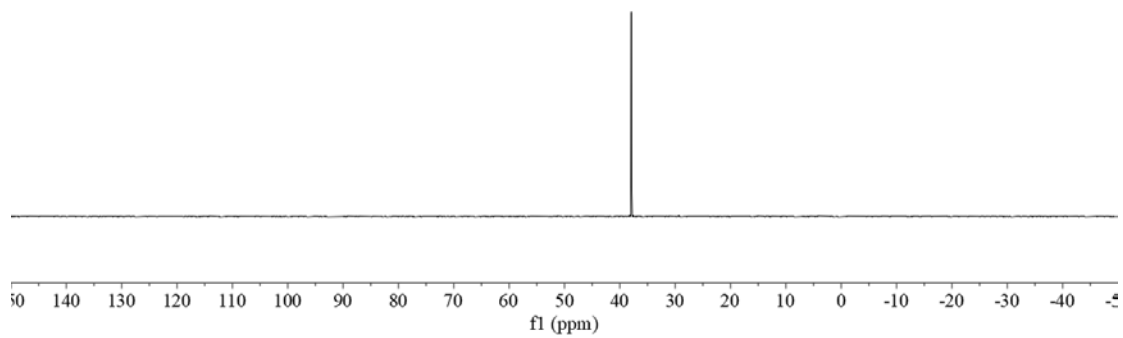

$^{31}\text{P}$  NMR ( $\text{CDCl}_3-d$ ) of **3o**

7.64  
7.62  
7.60  
7.58  
7.56  
7.54  
7.53  
7.51  
7.48  
7.47  
7.46  
7.43  
7.41  
7.39  
7.38  
7.37  
7.34  
7.33  
7.32  
7.31  
7.31  
7.26  
7.24  
7.23  
7.20  
7.18  
7.16  
7.15  
7.13  
7.12  
7.10  
7.06  
7.05  
7.04  
7.03

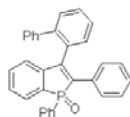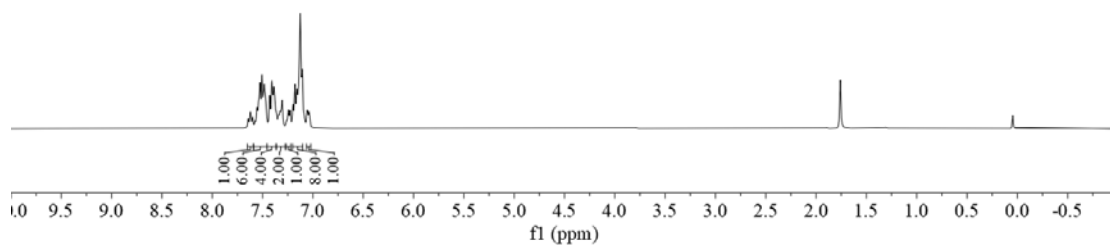

$^1\text{H}$  NMR ( $\text{CDCl}_3-d$ ) of **3p**

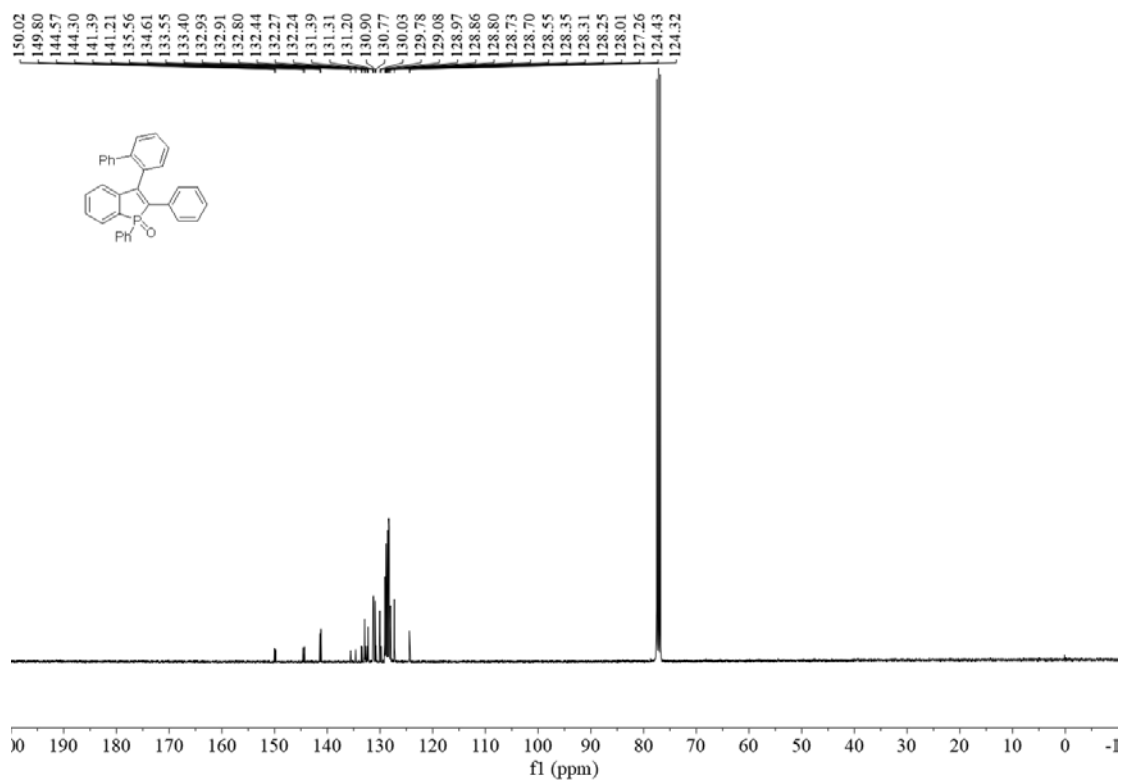

$^{13}\text{C}$  NMR ( $\text{CDCl}_3$ -*d*) of **3p**

-39.81

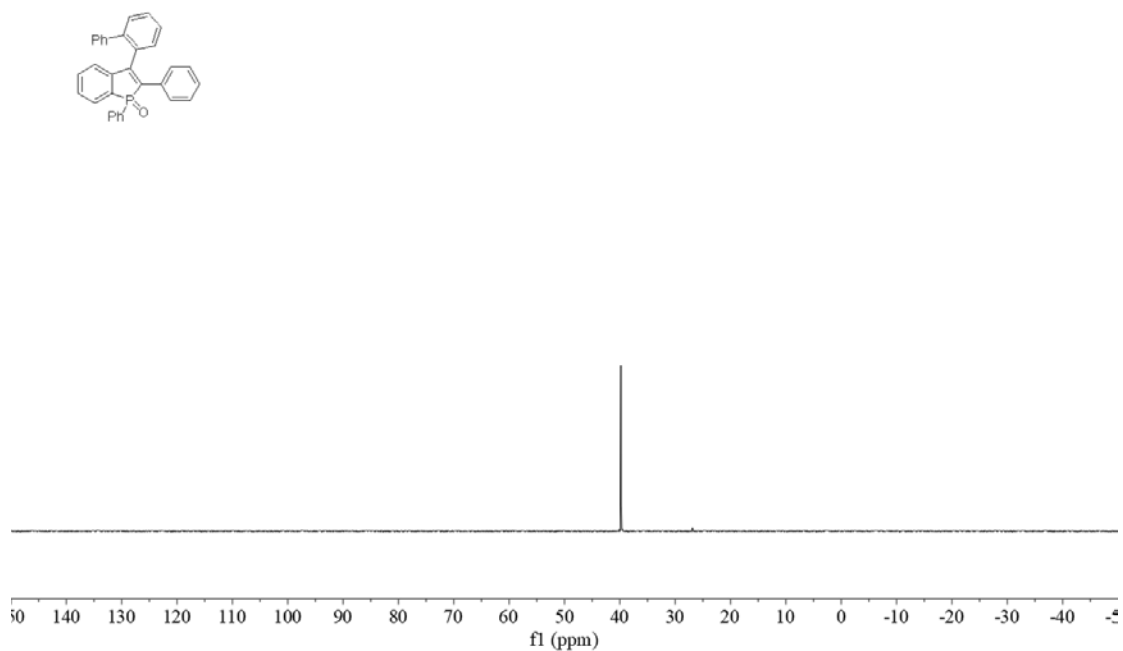

$^{31}\text{P}$  NMR ( $\text{CDCl}_3$ -*d*) of **3p**





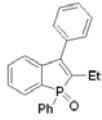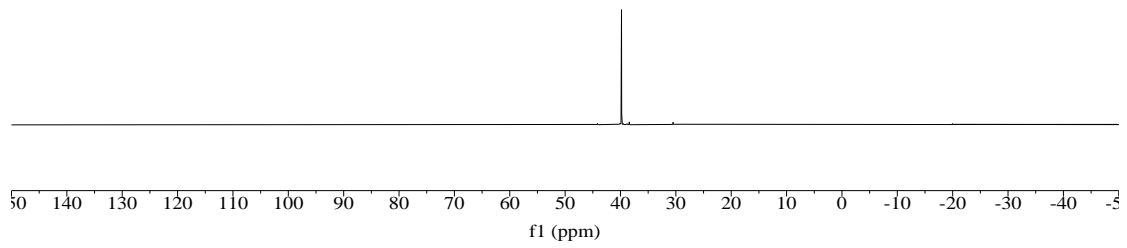

$^{31}\text{P}$  NMR ( $\text{CDCl}_3-d$ ) of **3q**

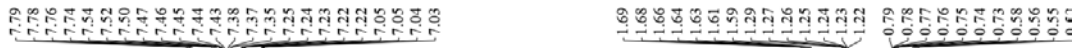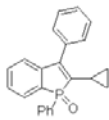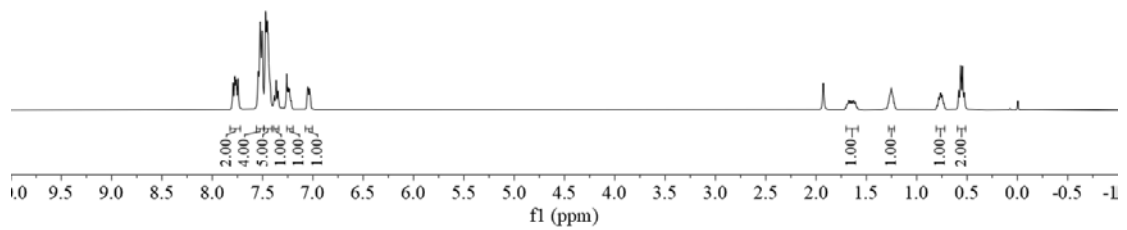

$^1\text{H}$  NMR ( $\text{CDCl}_3-d$ ) of **3r**

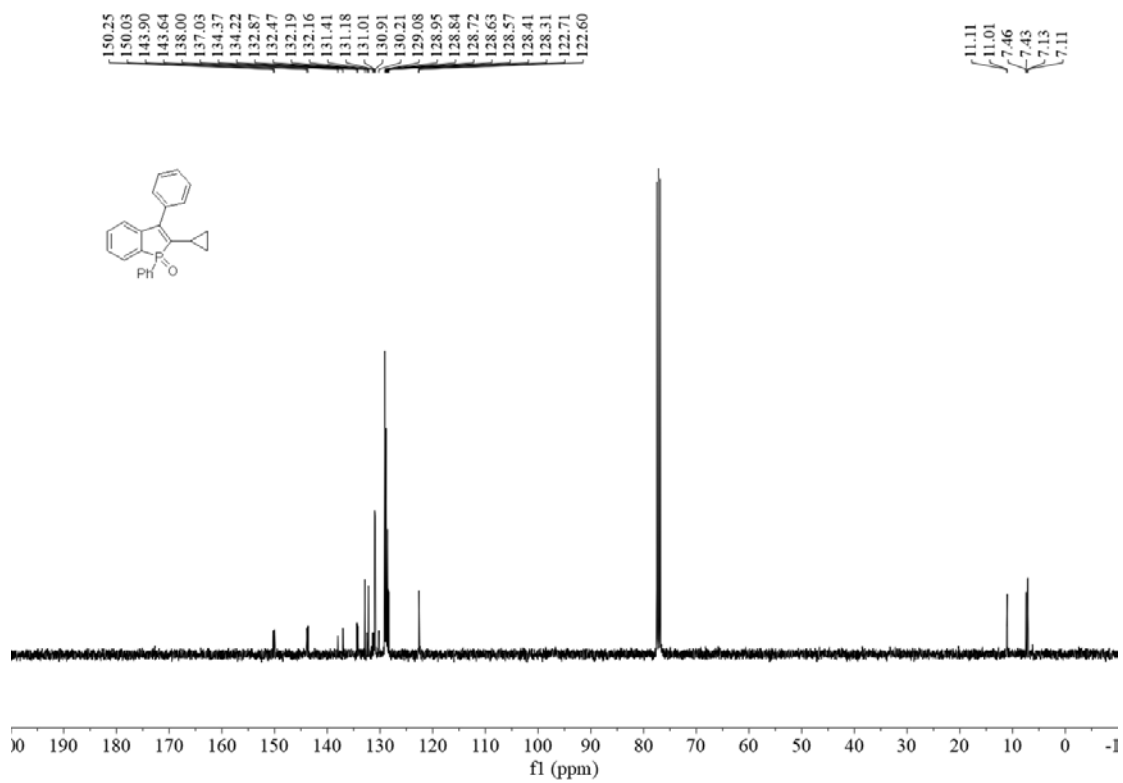

$^{13}\text{C}$  NMR ( $\text{CDCl}_3-d$ ) of **3r**

-37.56

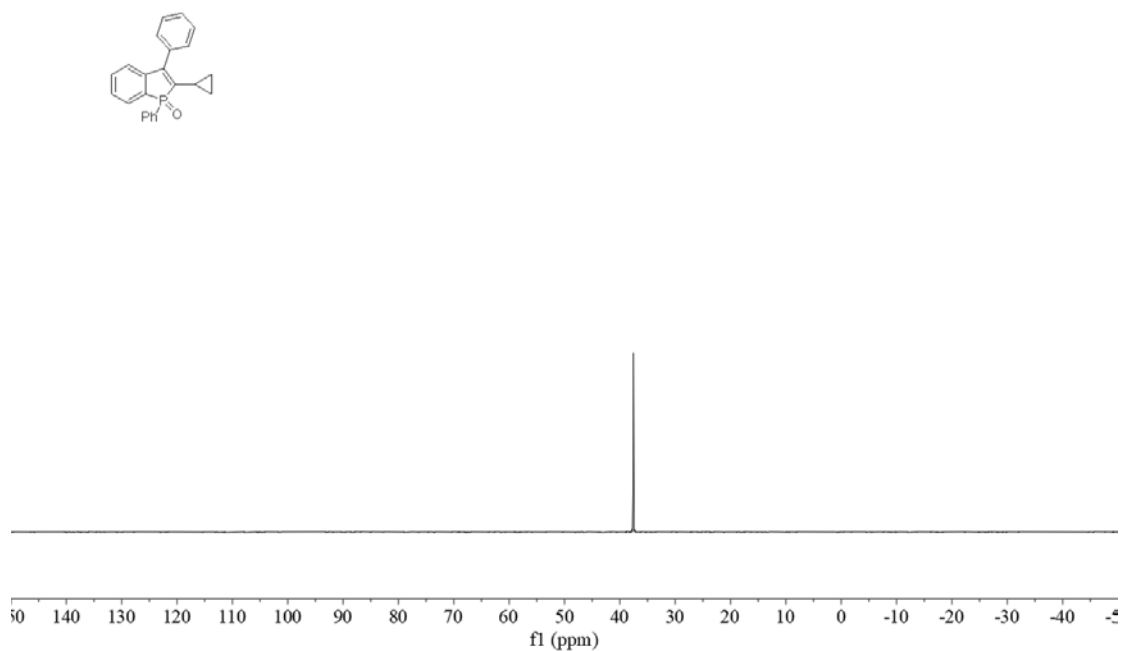

$^{31}\text{P}$  NMR ( $\text{CDCl}_3-d$ ) of **3r**

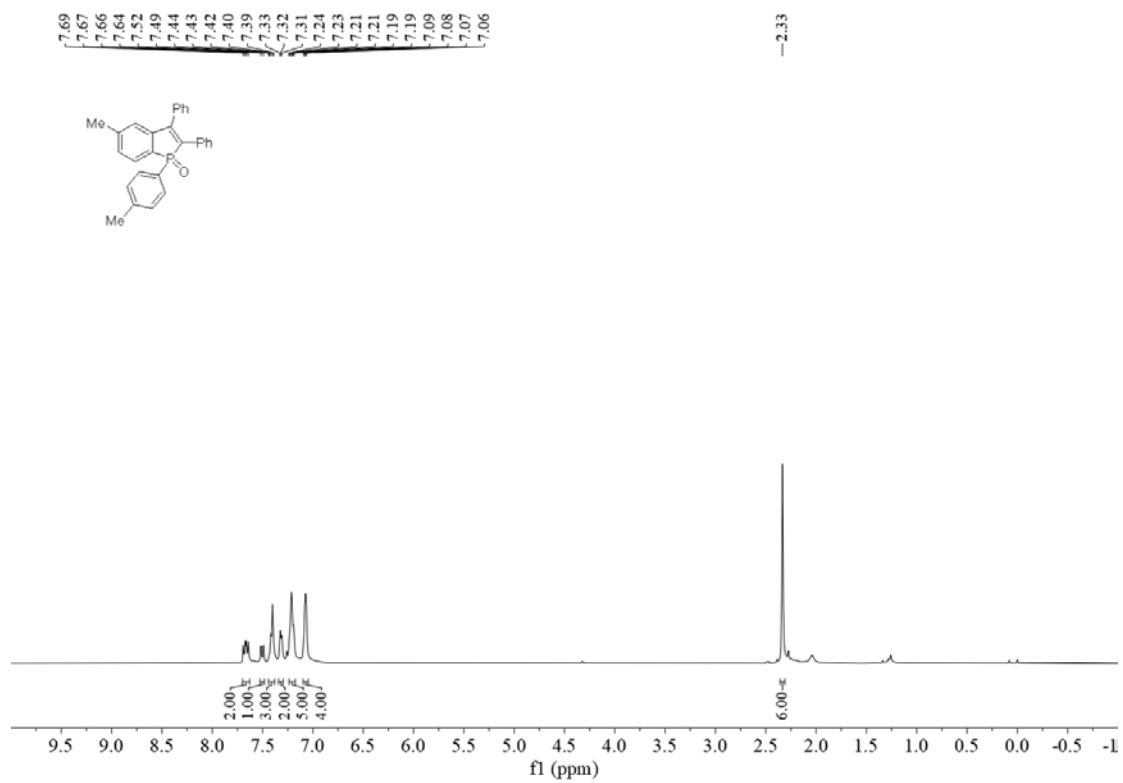

<sup>1</sup>H NMR (CDCl<sub>3</sub>-d) of **3s**

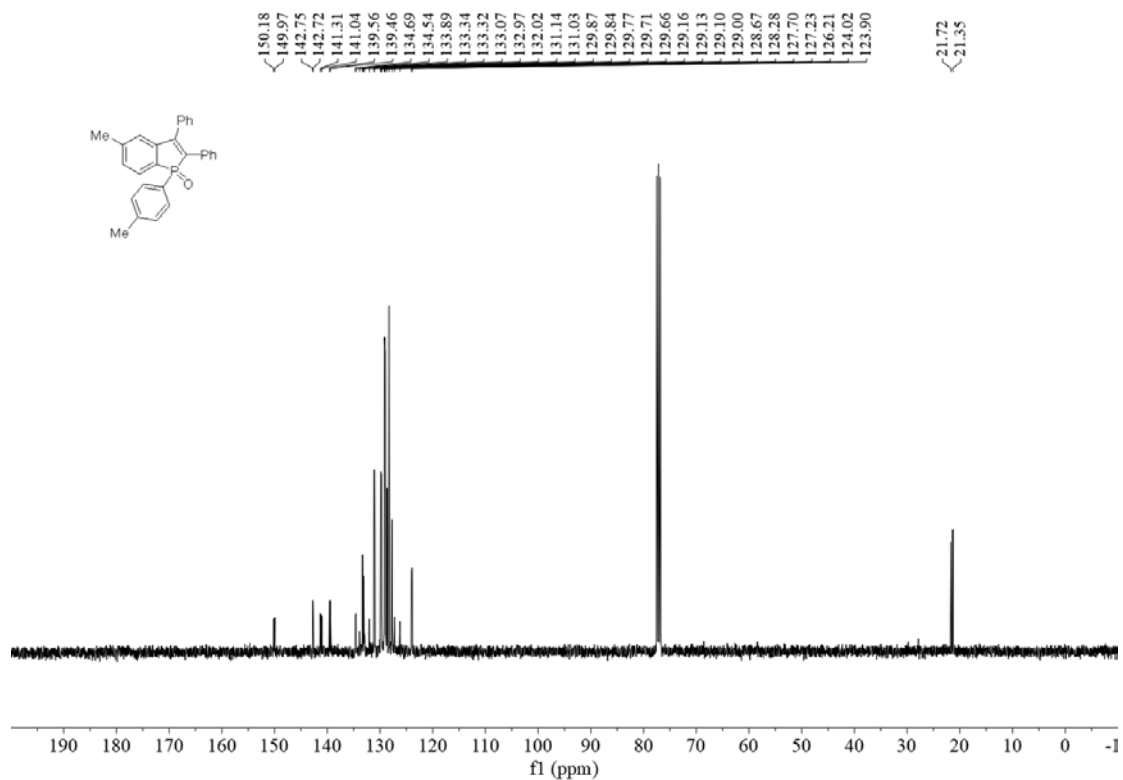

<sup>13</sup>C NMR (CDCl<sub>3</sub>-d) of **3s**

—39.50

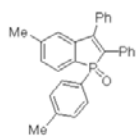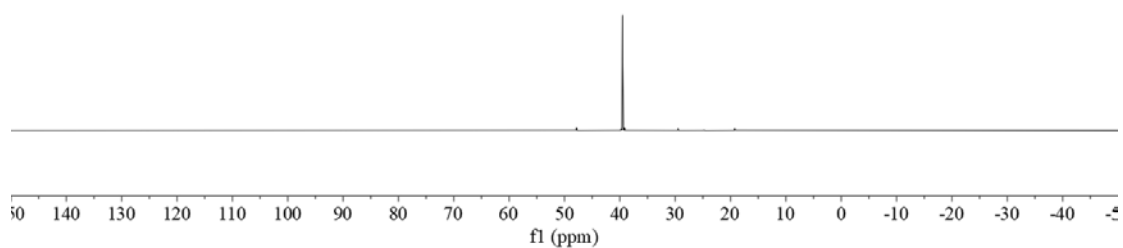

$^{31}\text{P}$  NMR ( $\text{CDCl}_3$ -d) of **3s**

7.59  
7.57  
7.56  
7.54  
7.30  
7.29  
7.28  
7.26  
7.18  
7.18  
7.16  
7.16  
7.13  
7.12  
7.10  
7.10  
7.07  
7.06  
7.06  
7.05  
7.05  
7.04  
6.98  
6.97  
6.96  
6.95  
6.94  
6.94  
6.93  
6.78  
6.78  
6.76  
3.66  
3.66

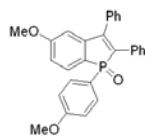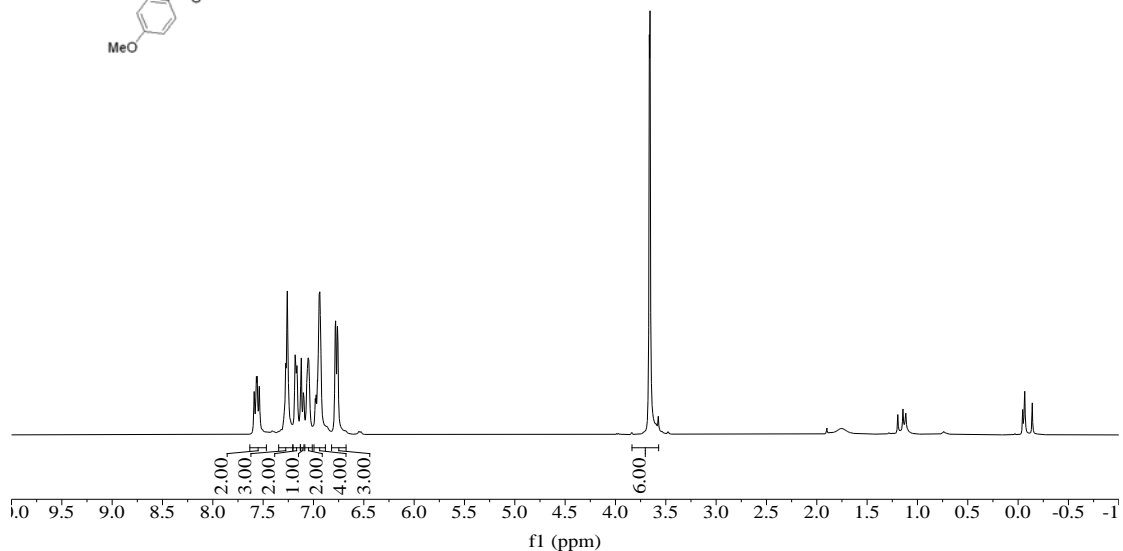

$^1\text{H}$  NMR ( $\text{CDCl}_3$ -d) of **3t**

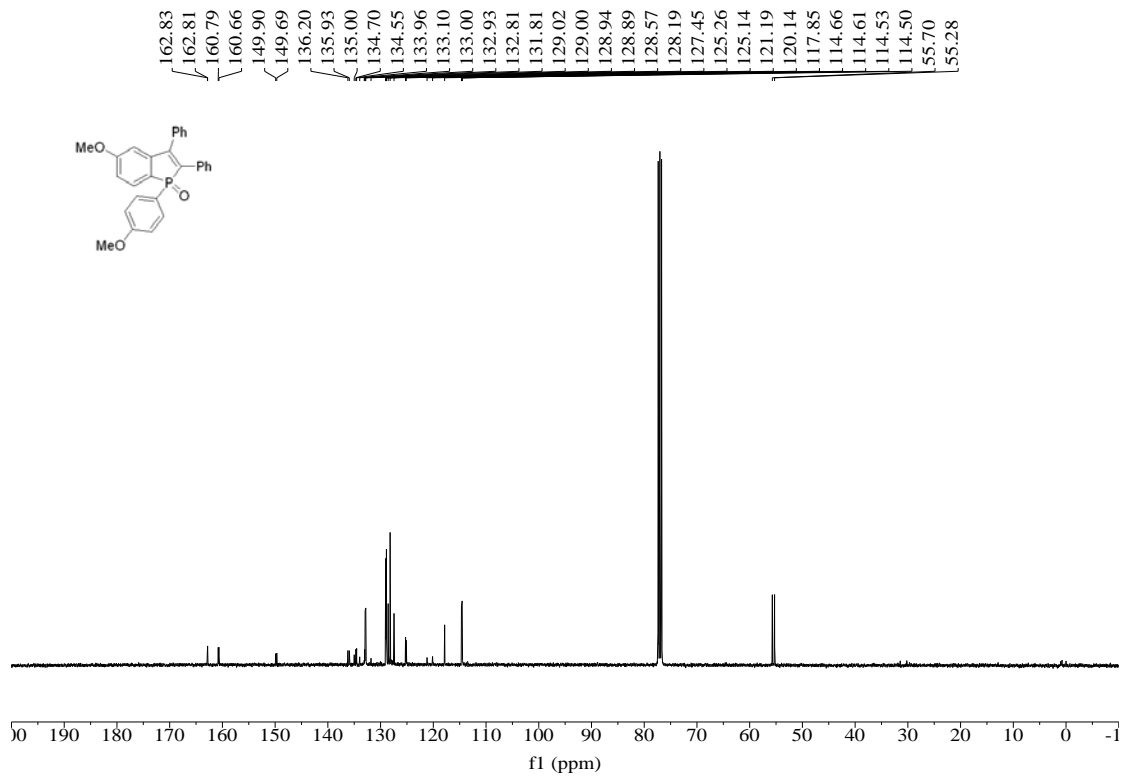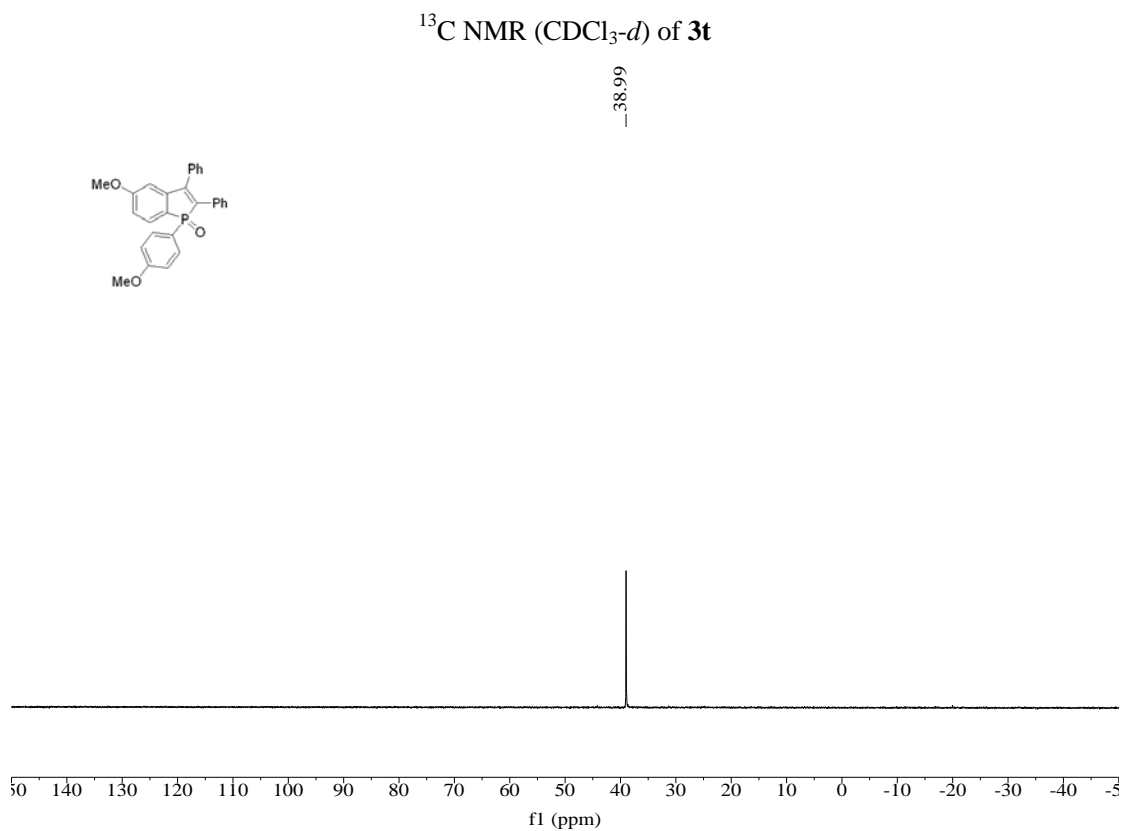

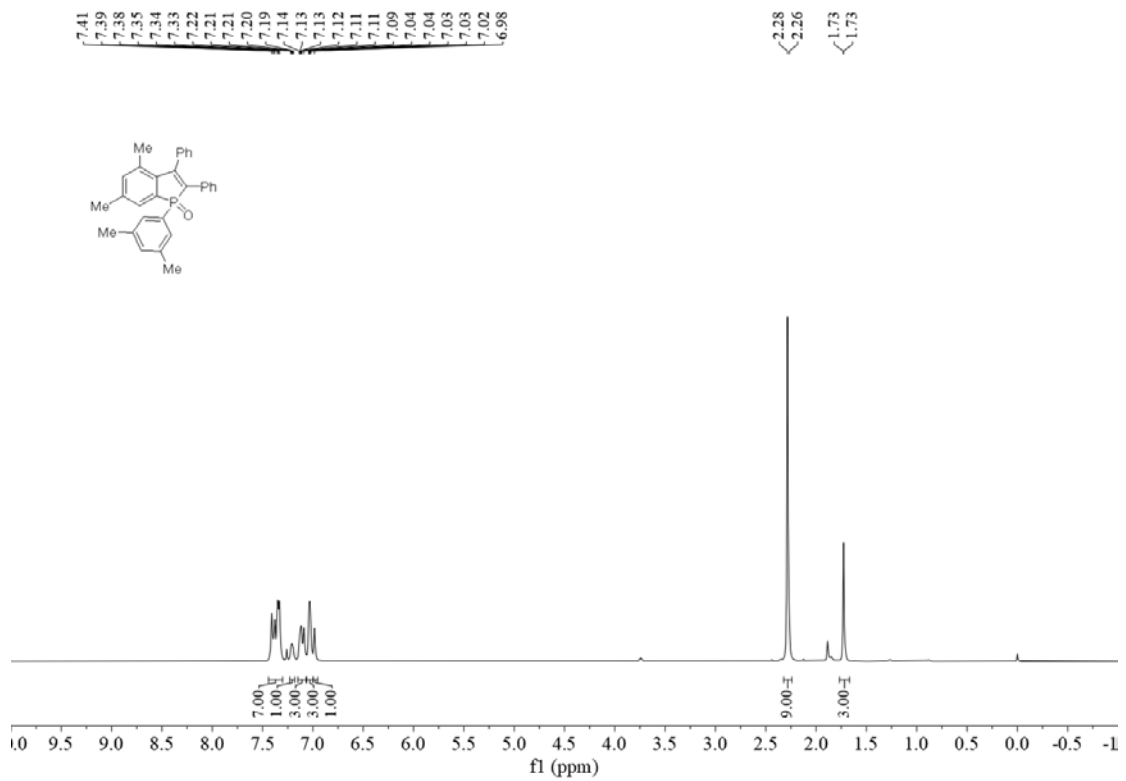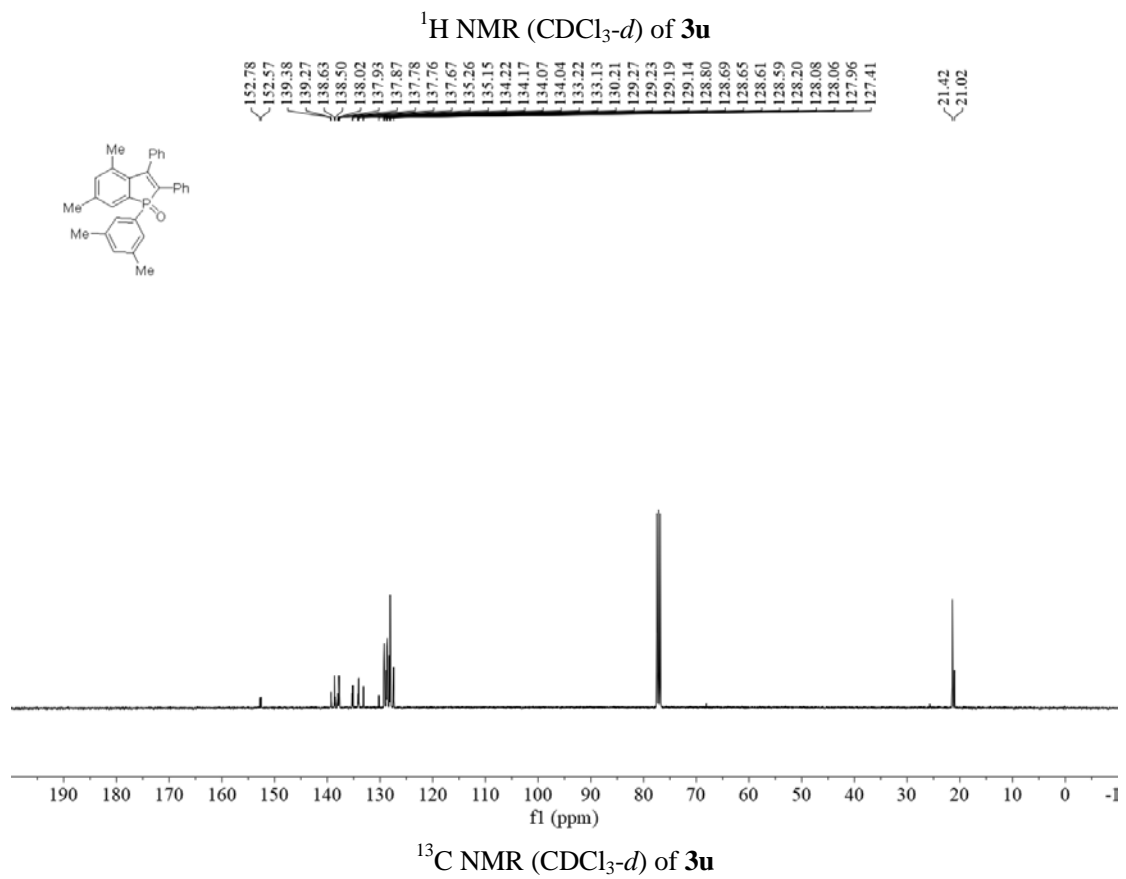

—38.39

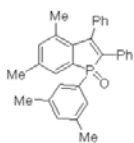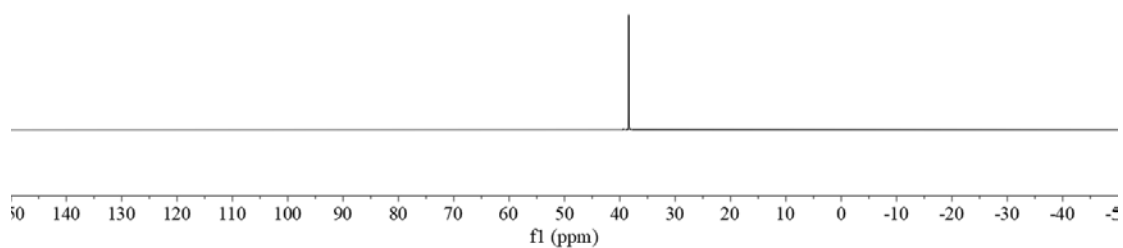

$^{31}\text{P}$  NMR ( $\text{CDCl}_3$ -d) of **3u**

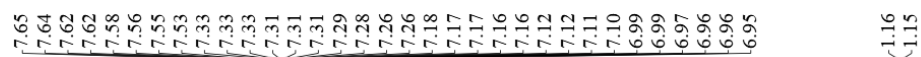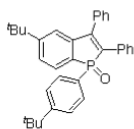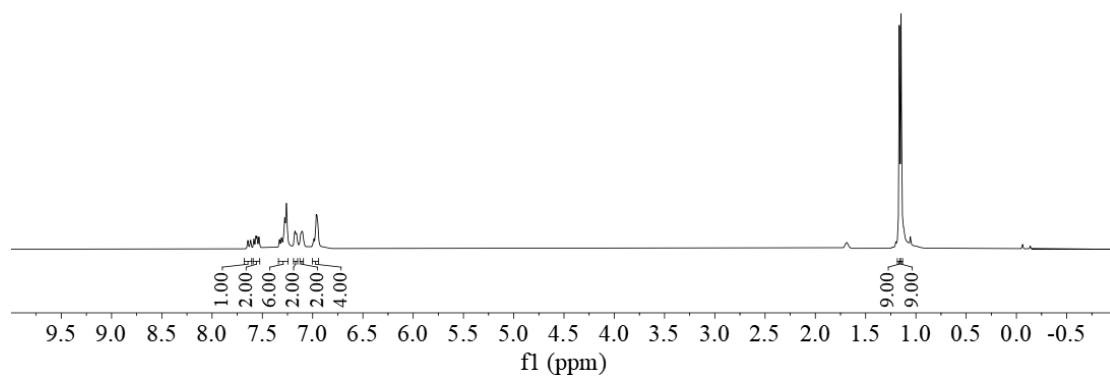

$^1\text{H}$  NMR ( $\text{CDCl}_3$ -d) of **3v**

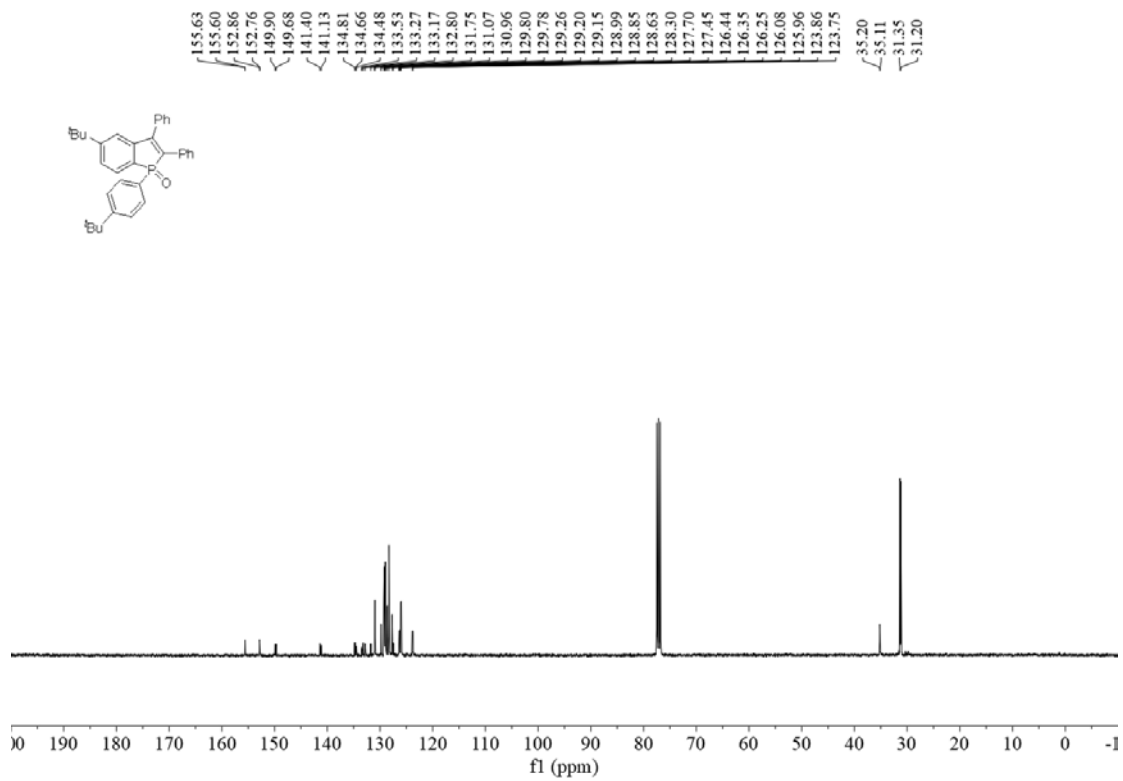

$^{13}\text{C}$  NMR ( $\text{CDCl}_3$ -*d*) of **3v**

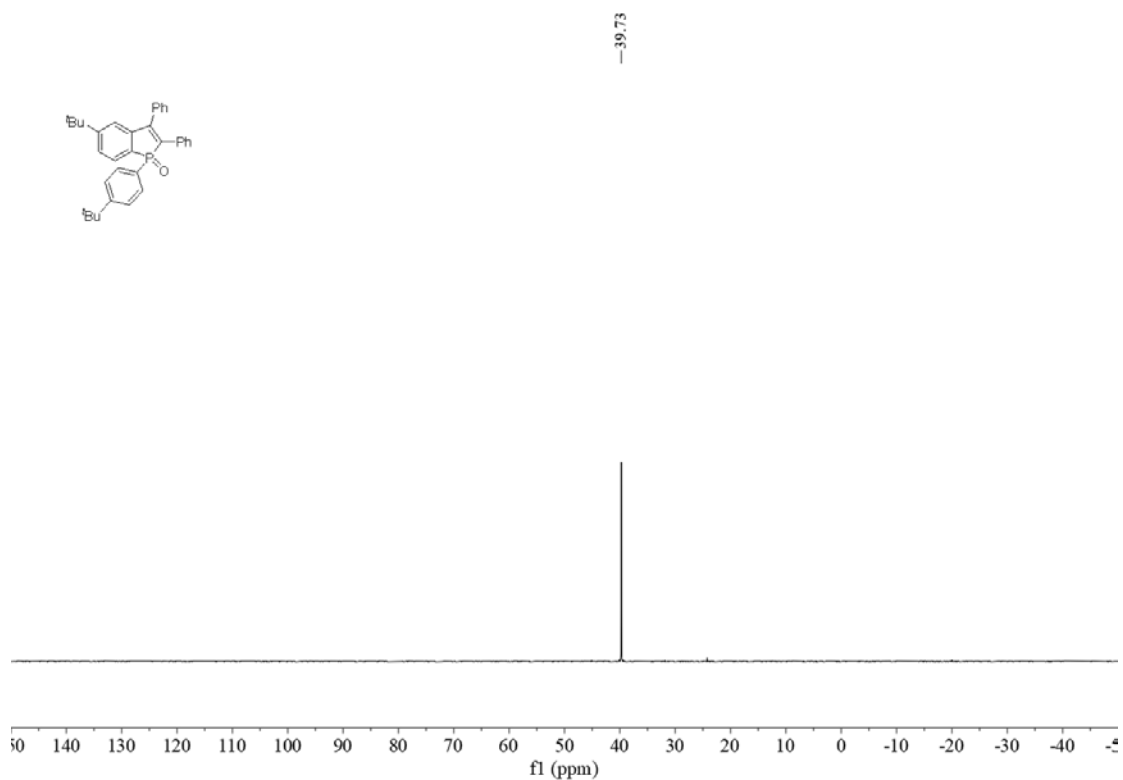

$^{31}\text{P}$  NMR ( $\text{CDCl}_3$ -*d*) of **3v**



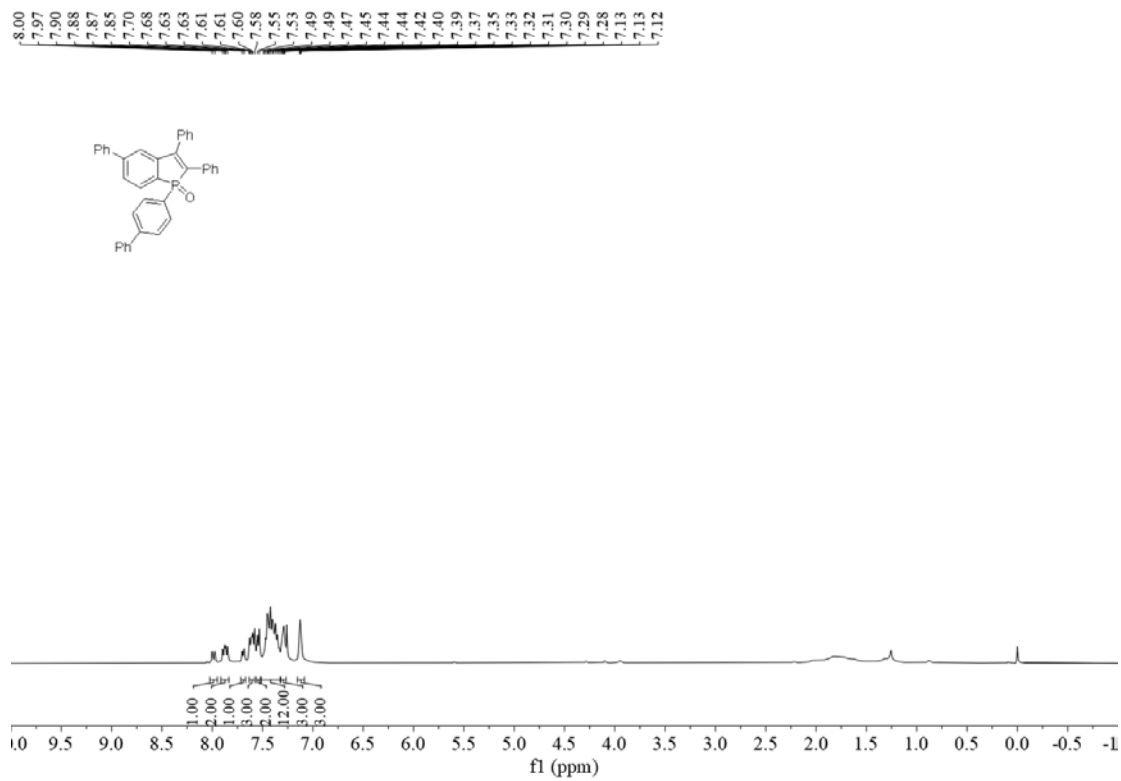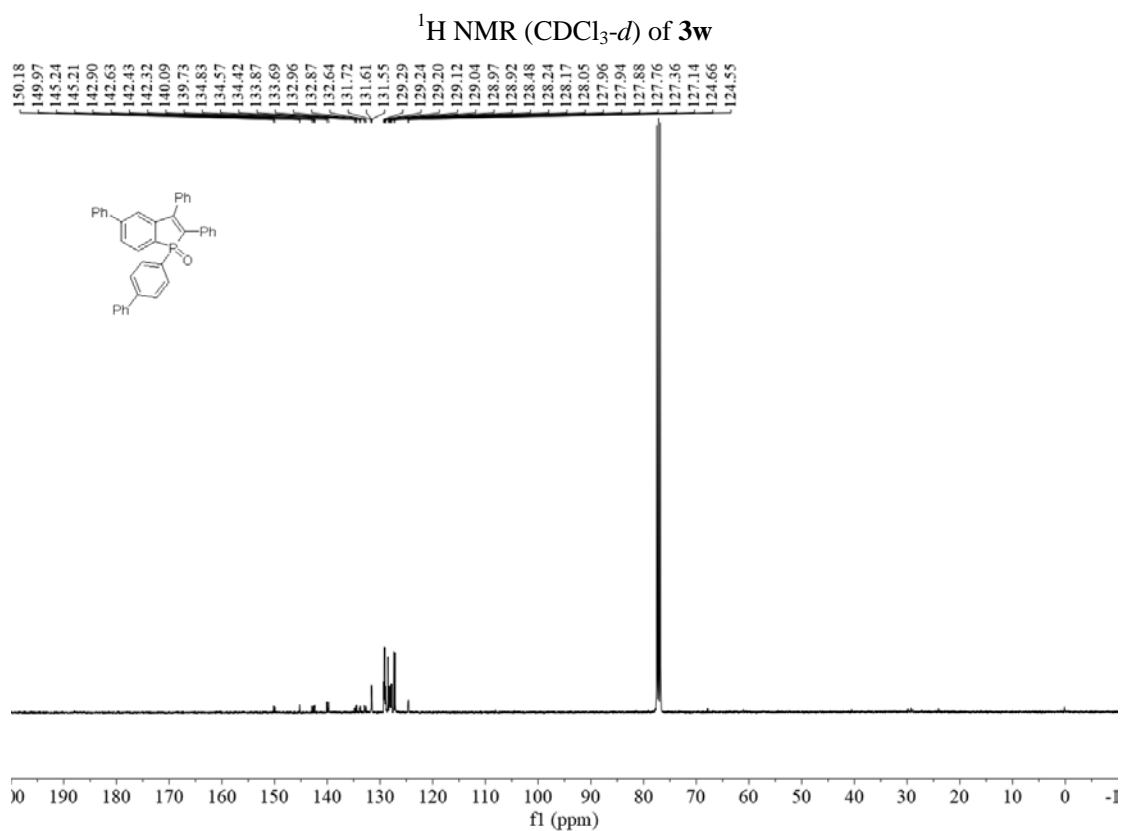

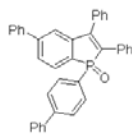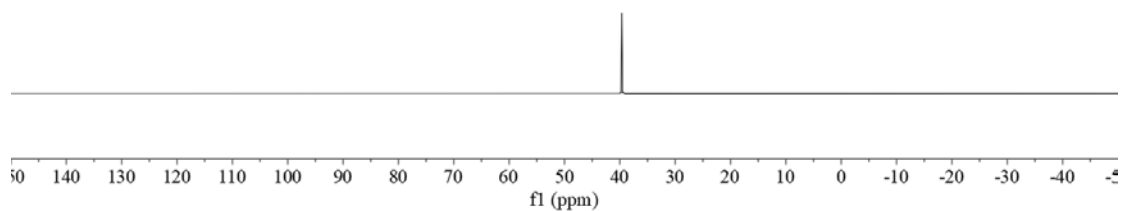

$^{31}\text{P}$  NMR ( $\text{CDCl}_3-d$ ) of **3w**

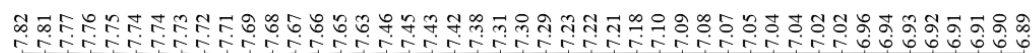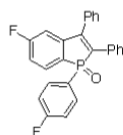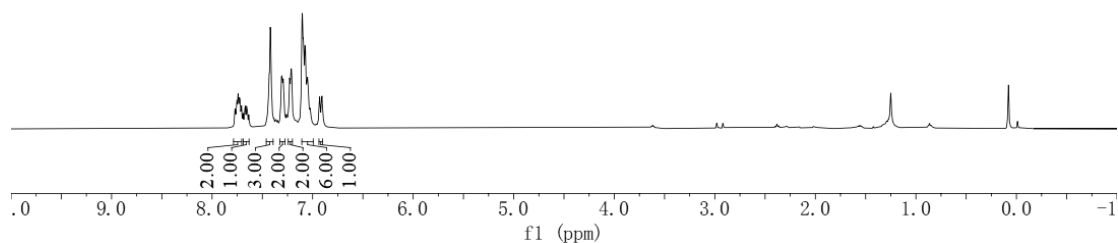

$^1\text{H}$  NMR ( $\text{CDCl}_3-d$ ) of **3x**

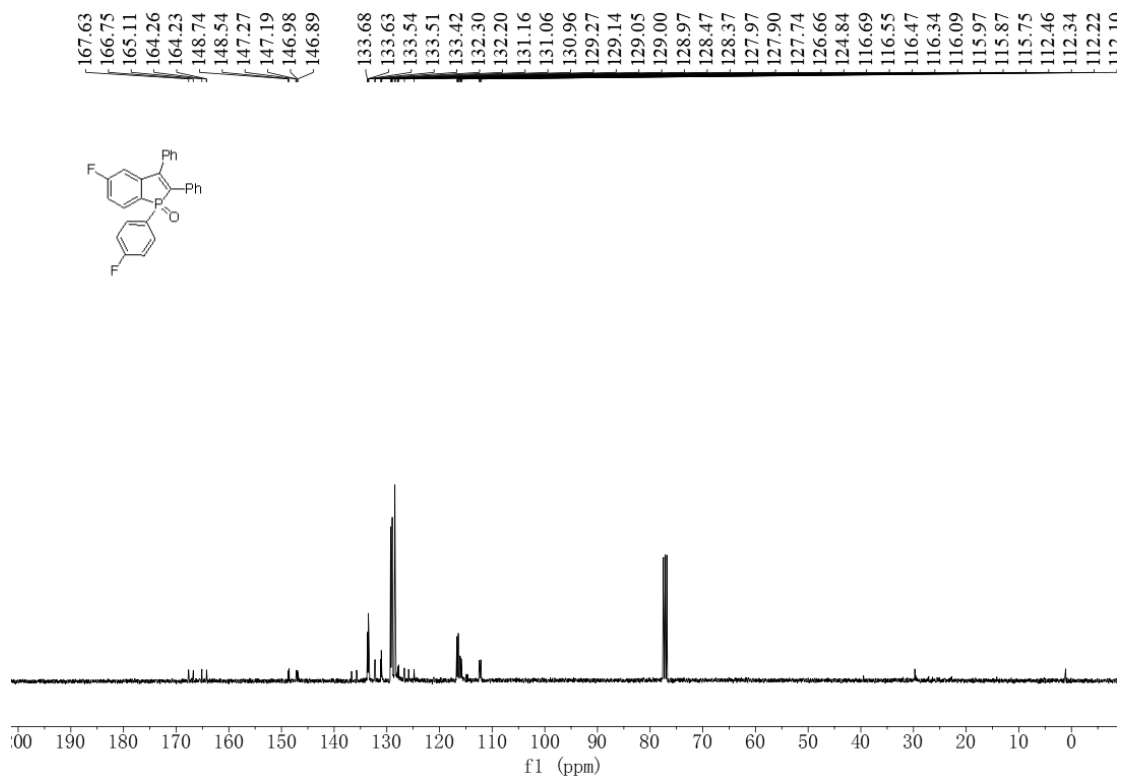

$^{13}\text{C}$  NMR ( $\text{CDCl}_3-d$ ) of **3x**

36.63

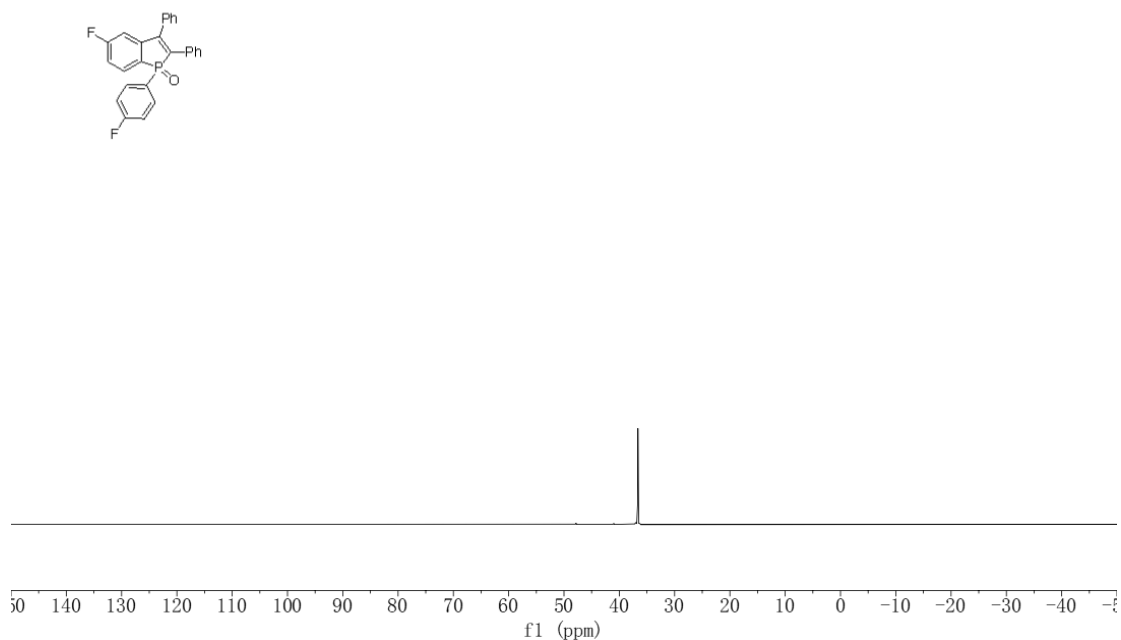

$^{31}\text{P}$  NMR ( $\text{CDCl}_3-d$ ) of **3x**

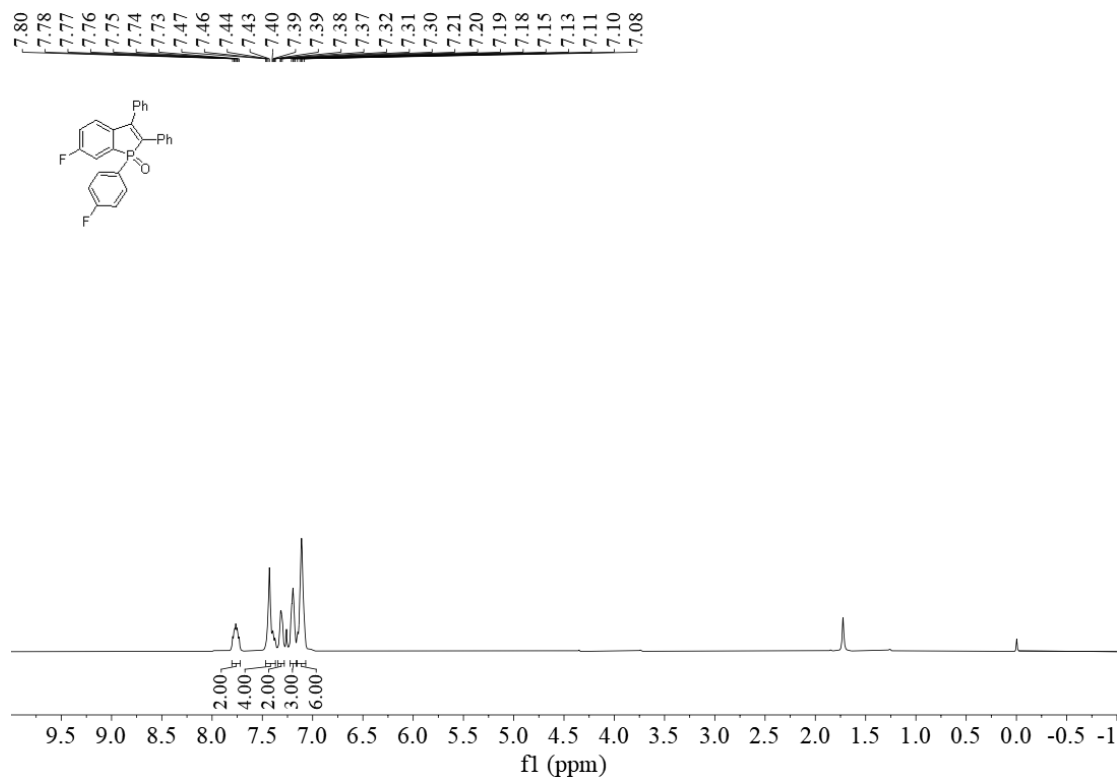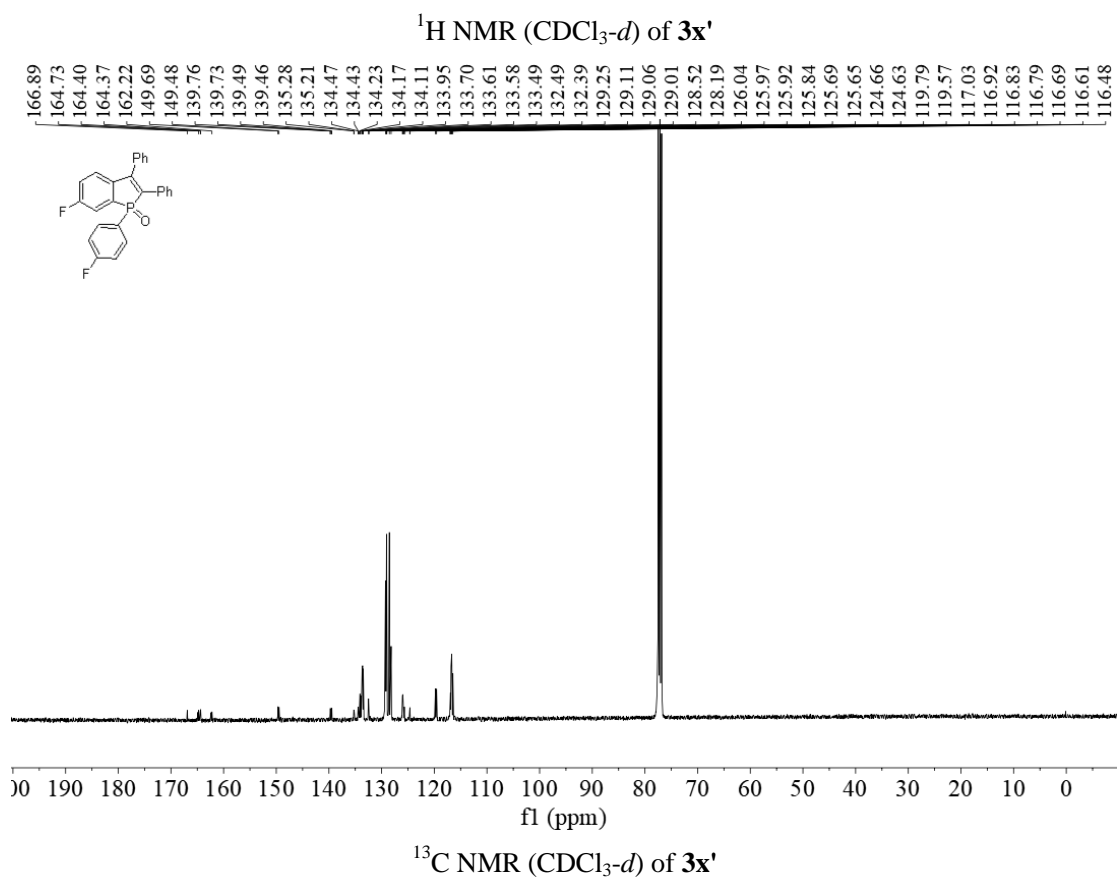

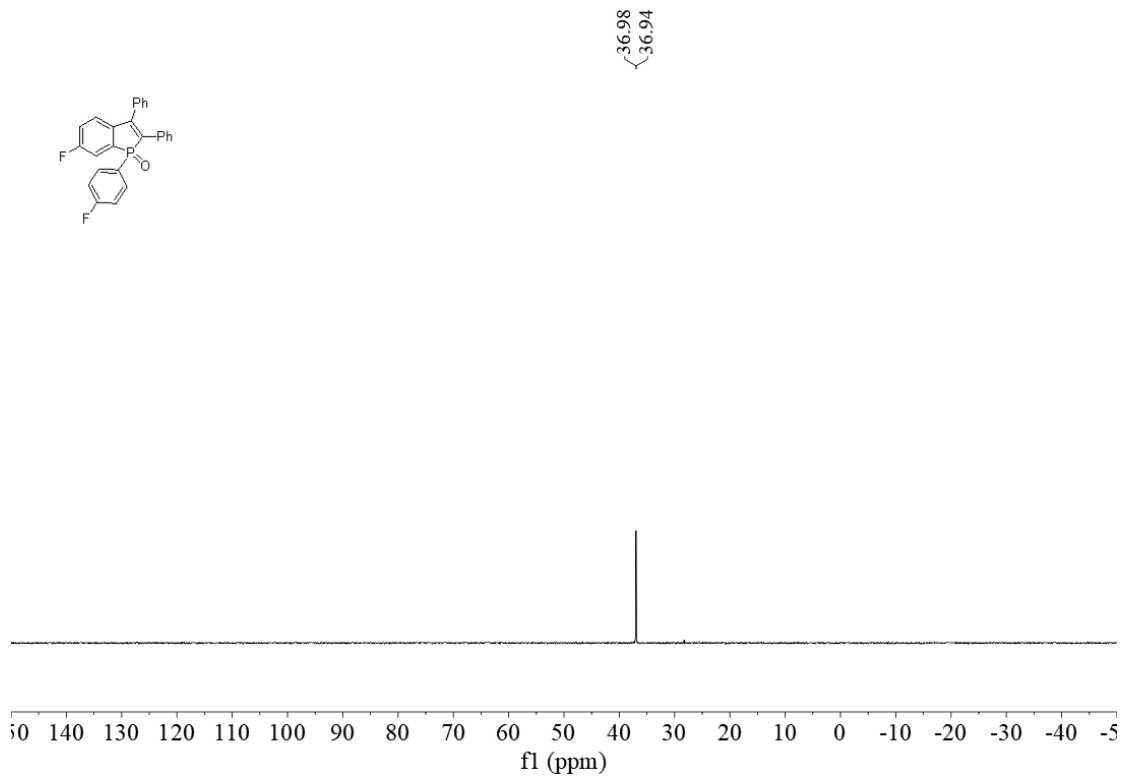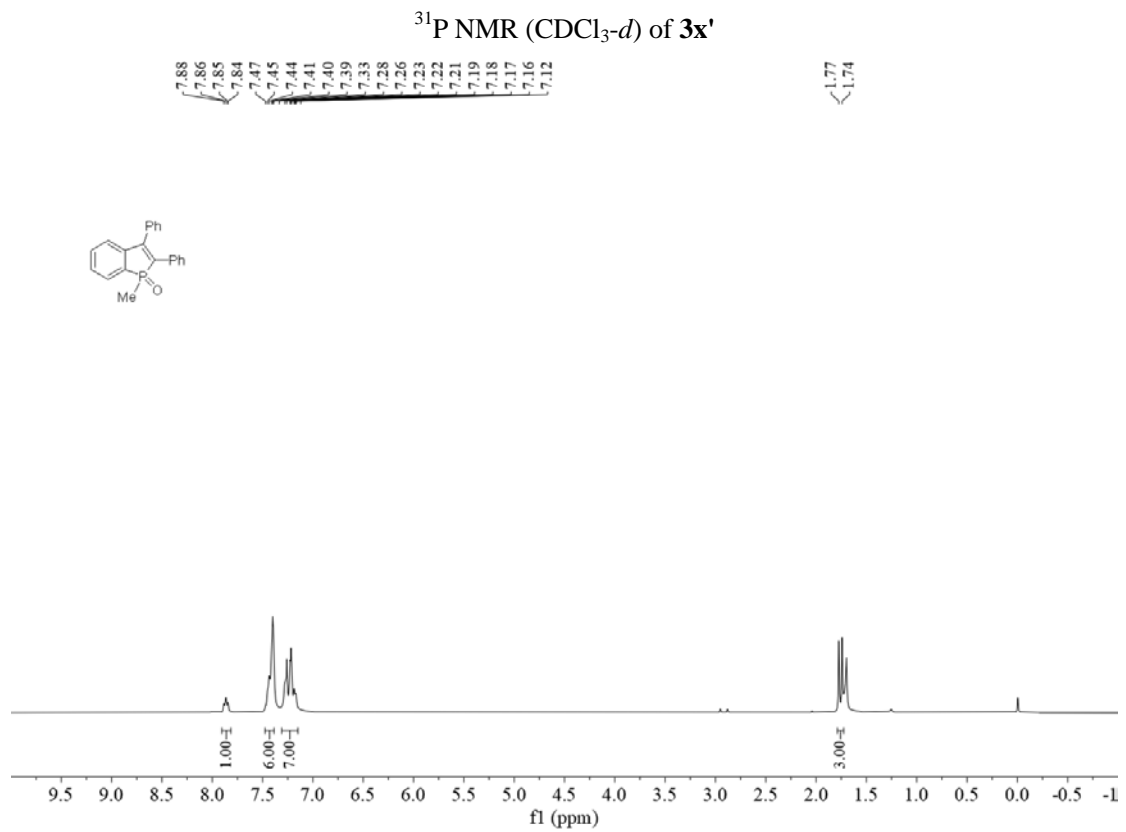

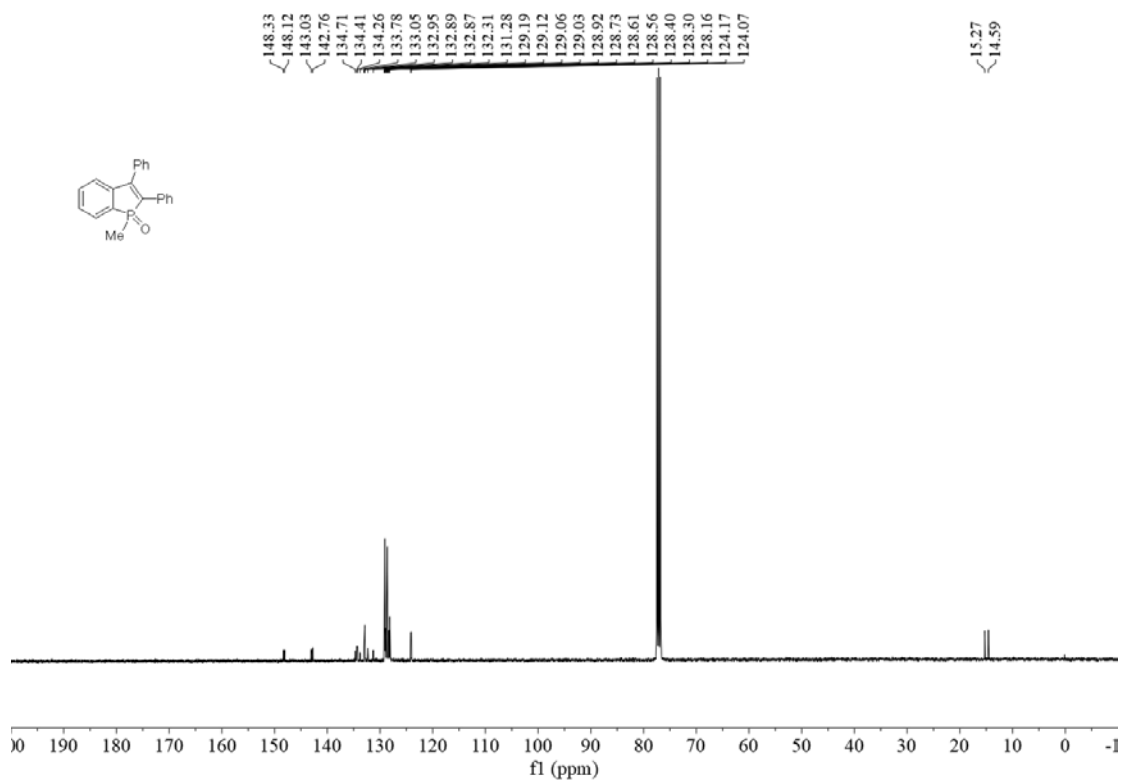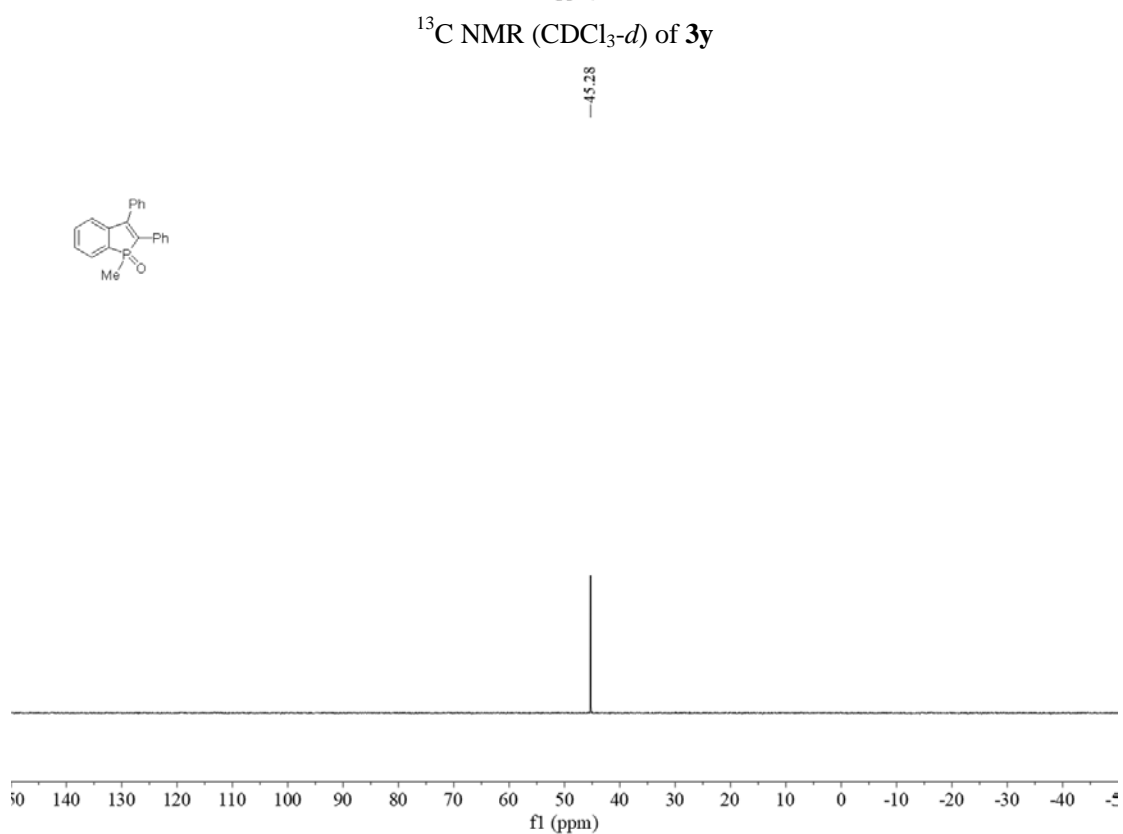

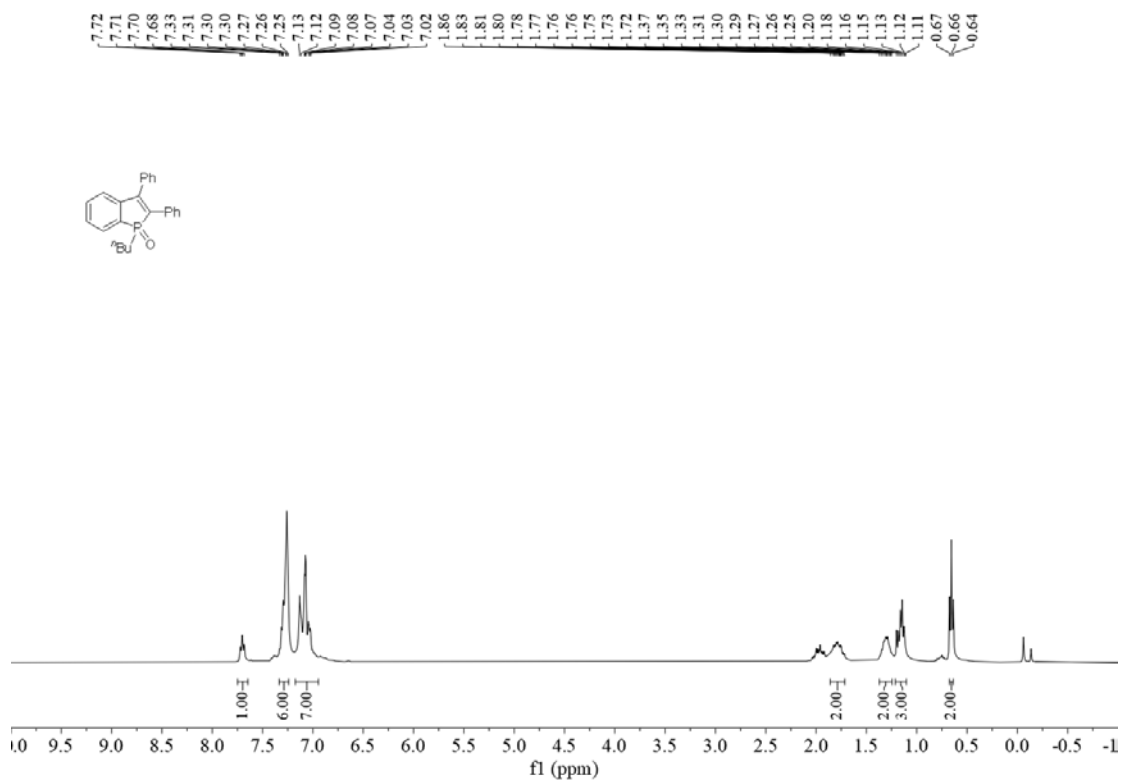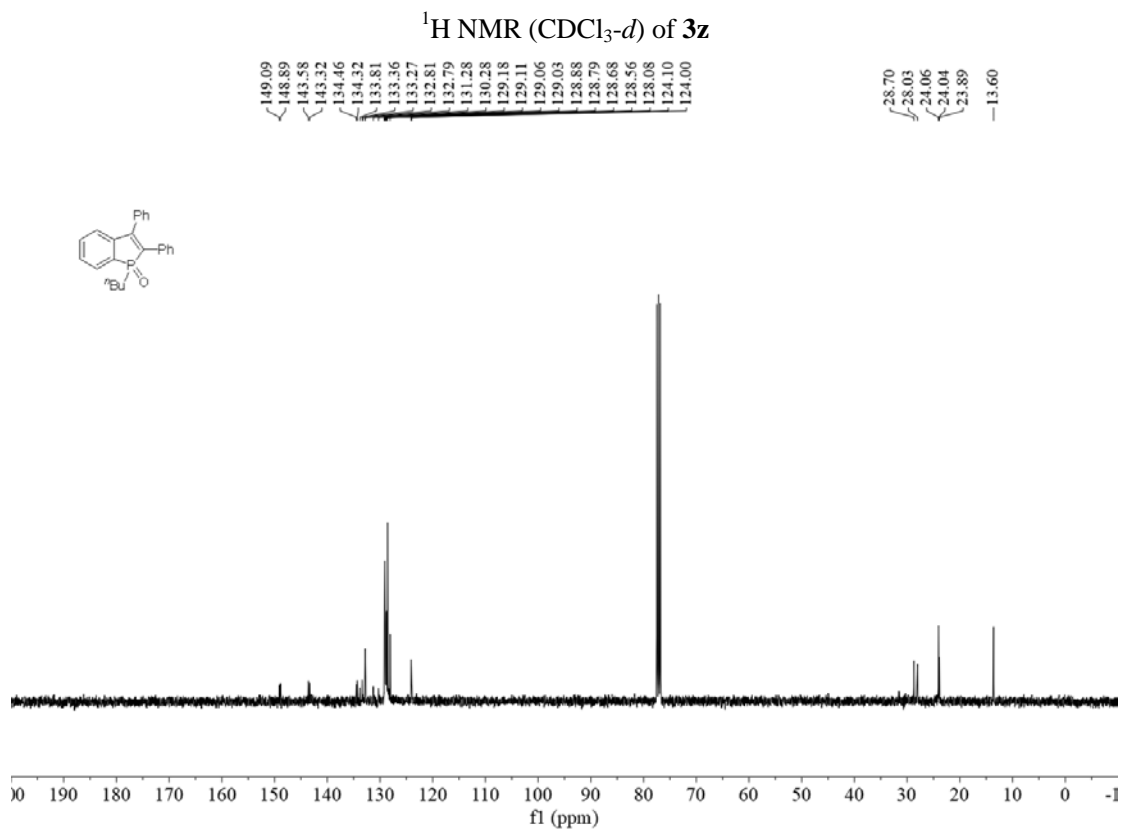

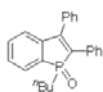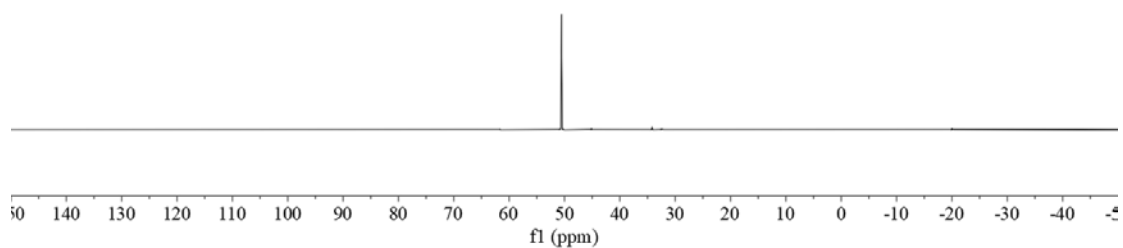

7.88  
7.86  
7.84  
7.81  
7.51  
7.49  
7.47  
7.46  
7.45  
7.44  
7.33  
7.31  
7.29  
7.27  
7.26  
7.25  
7.21  
7.19  
2.16  
2.13  
2.13  
2.10  
2.09  
2.07  
2.06  
2.05  
1.89  
1.85  
1.82  
1.81  
1.69  
1.66  
1.49  
1.48  
1.47  
1.45  
1.45  
1.44  
1.40  
1.34  
1.32  
1.27  
1.26  
1.25  
1.23  
1.23  
1.22  
1.19  
1.18  
1.17  
1.16  
1.15  
1.14  
1.13  
1.11  
1.10  
1.10  
1.07  
0.94  
0.93  
0.92  
0.91

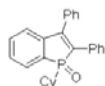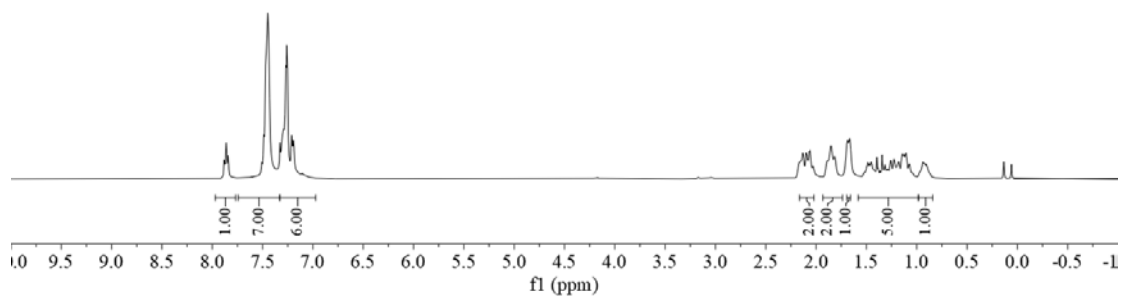



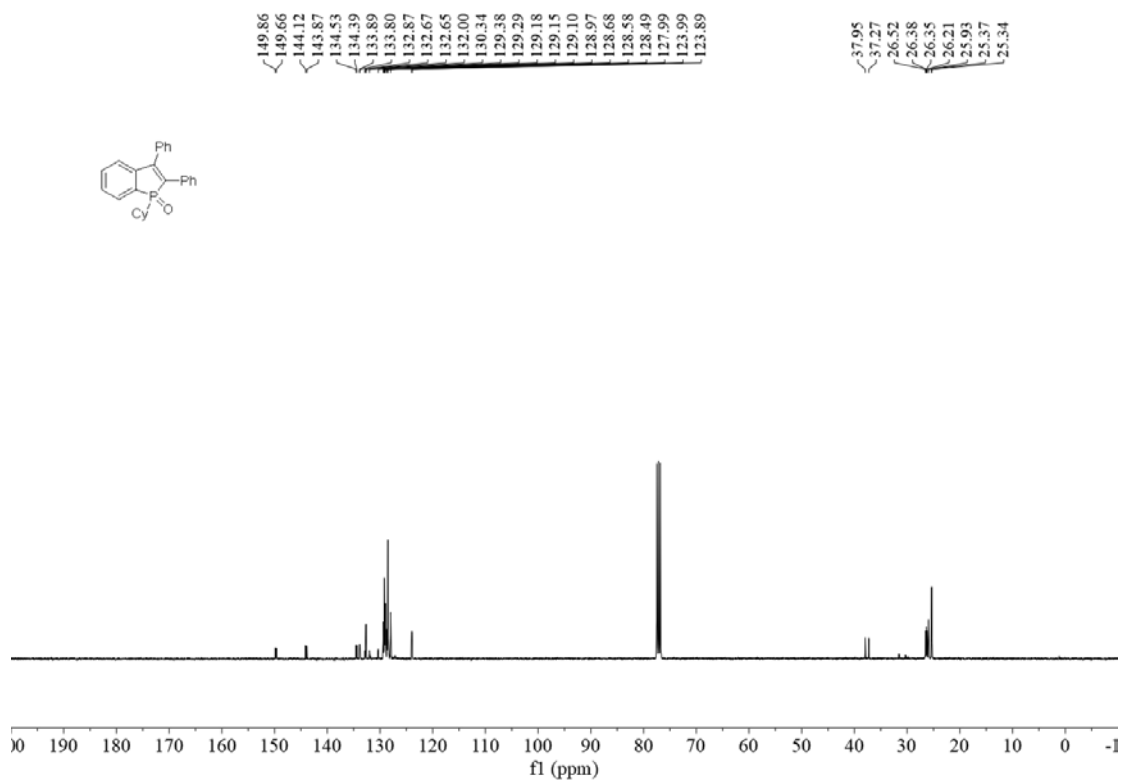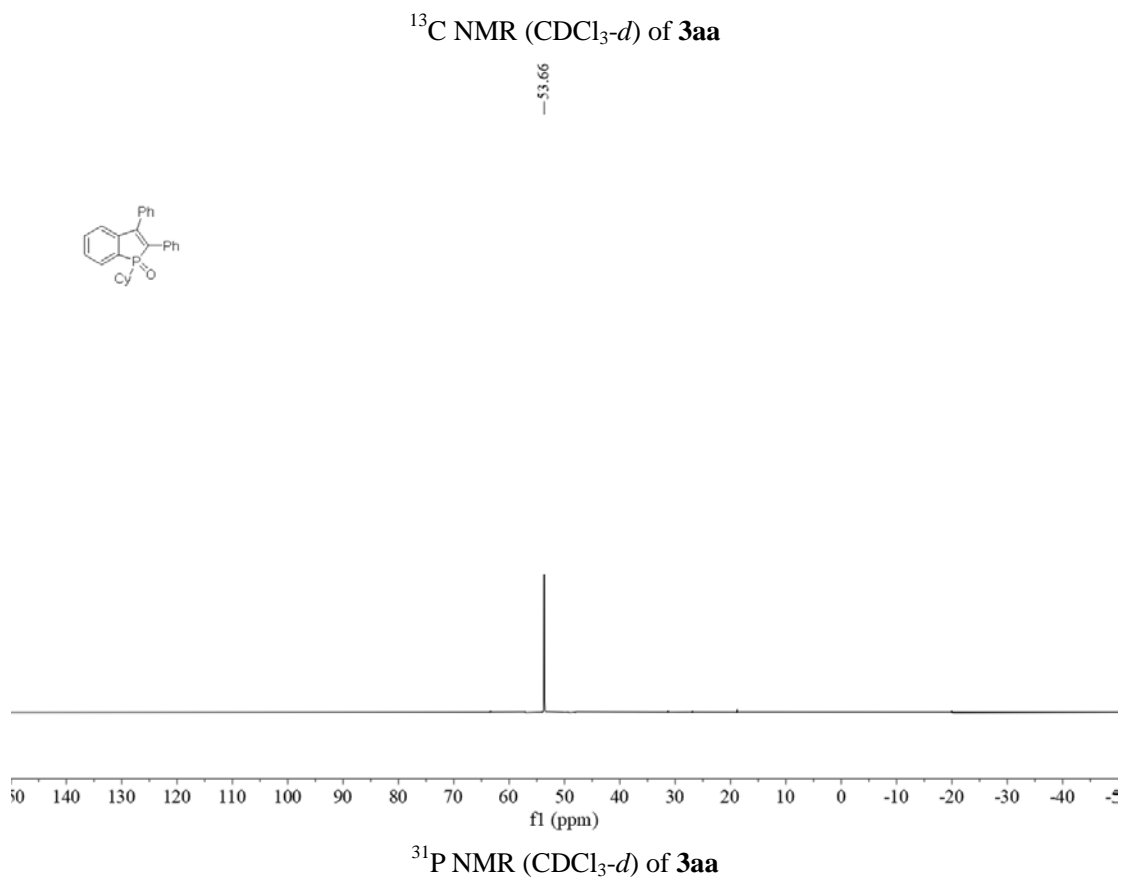



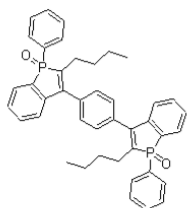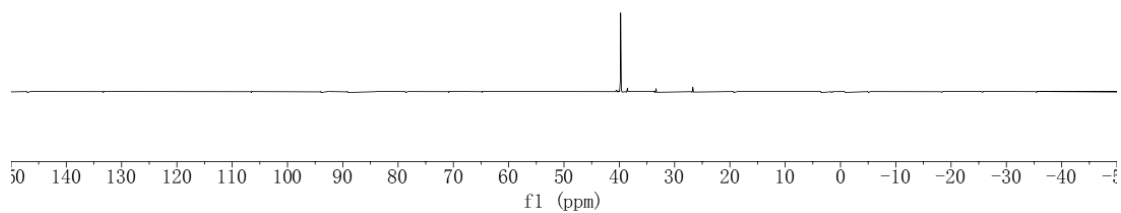

<sup>31</sup>P NMR (CDCl<sub>3</sub>-d) of **3ab**

7.83  
7.81  
7.80  
7.79  
7.77  
7.75  
7.66  
7.65  
7.64  
7.62  
7.55  
7.53  
7.49  
7.48  
7.46  
7.44  
7.44  
7.42  
7.35  
7.34  
7.33  
7.32  
7.31  
7.13  
7.12  
7.11  
7.10  
2.49  
2.28  
1.42  
1.42  
1.41  
1.40  
1.39  
1.38  
1.38  
1.37  
1.36  
1.35  
1.33  
1.19  
1.17  
1.15  
1.13  
1.11  
0.70  
0.68  
0.66

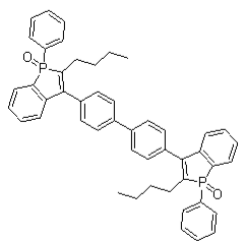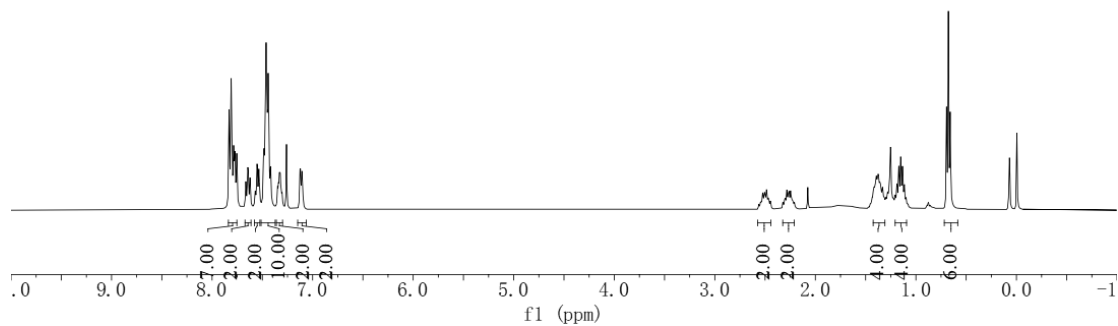

<sup>1</sup>H NMR (CDCl<sub>3</sub>-d) of **3ac**

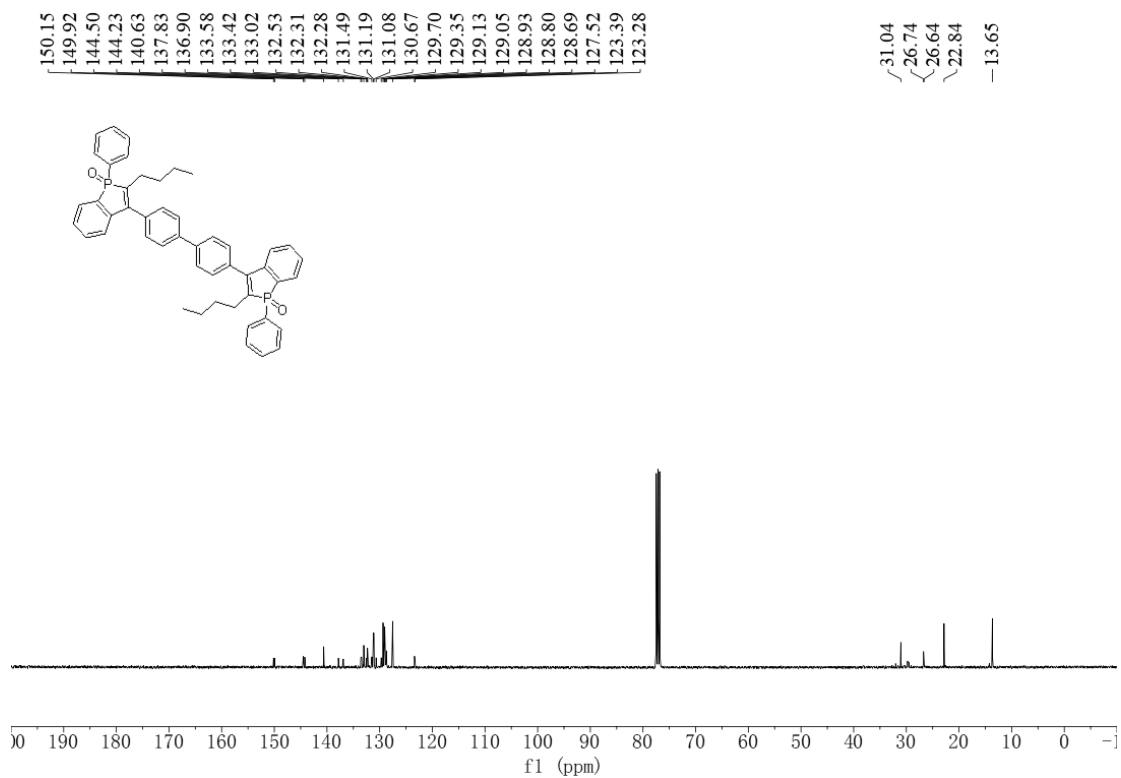

$^{13}\text{C}$  NMR (CDCl<sub>3</sub>-d) of **3ac**

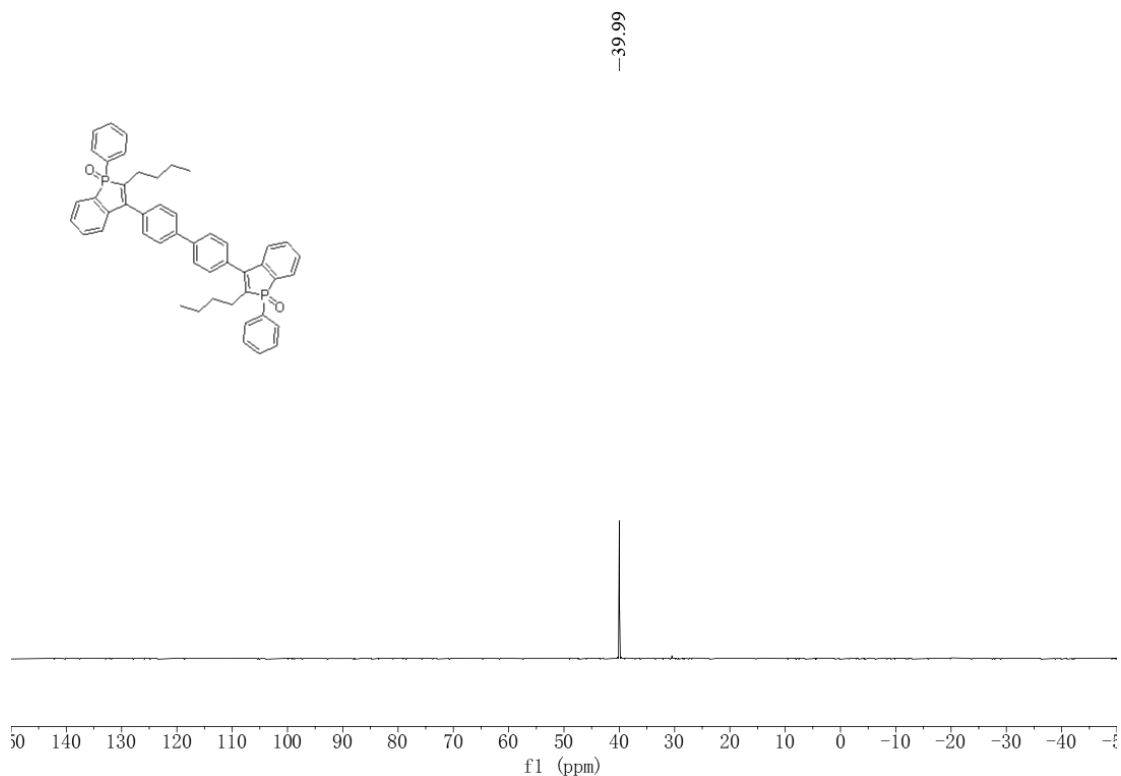

$^{31}\text{P}$  NMR (CDCl<sub>3</sub>-d) of **3ac**

## 8. X-ray crystal structures of **3c'** and **3j**.

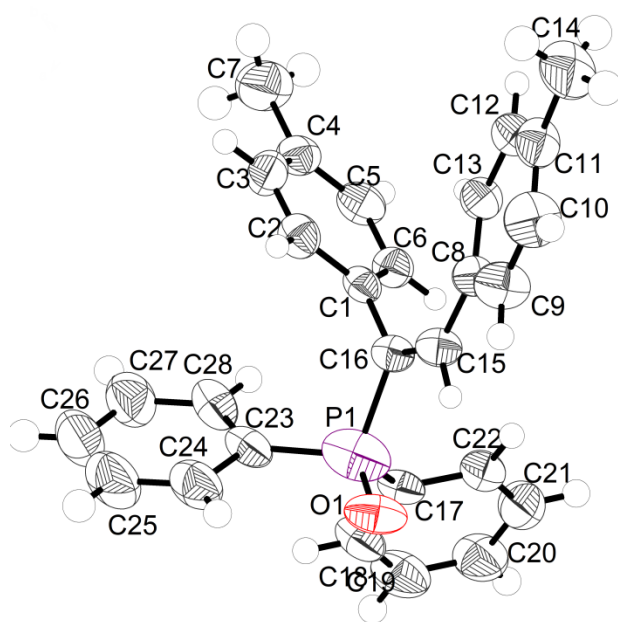

Figure s5. Crystal plot of compound **3c'** (The ellipsoid probability =50%). The single-crystal was obtained by slow volatilization in mixed solutions of  $\text{CH}_2\text{Cl}_2/\text{n-hexane}$  (1/5). CCDC 2300783.

**Table s1 Crystal data and structure refinement for **3c'**.**

|                                               |                                                              |
|-----------------------------------------------|--------------------------------------------------------------|
| Identification code                           | 221119HUANGHY2_0m                                            |
| Empirical formula                             | $\text{C}_{28}\text{H}_{25}\text{OP}$                        |
| Formula weight                                | 408.45                                                       |
| Temperature/K                                 | 296.15                                                       |
| Crystal system                                | monoclinic                                                   |
| Space group                                   | $P2_1/n$                                                     |
| $a/\text{\AA}$                                | 13.961(2)                                                    |
| $b/\text{\AA}$                                | 9.9168(16)                                                   |
| $c/\text{\AA}$                                | 21.452(3)                                                    |
| $\alpha/^\circ$                               | 90                                                           |
| $\beta/^\circ$                                | 106.577(3)                                                   |
| $\gamma/^\circ$                               | 90                                                           |
| Volume/ $\text{\AA}^3$                        | 2846.6(8)                                                    |
| Z                                             | 4                                                            |
| $\rho_{\text{calc}}/\text{g/cm}^3$            | 0.953                                                        |
| $\mu/\text{mm}^{-1}$                          | 0.110                                                        |
| F(000)                                        | 864.0                                                        |
| Crystal size/ $\text{mm}^3$                   | $0.03 \times 0.02 \times 0.01$                               |
| Radiation                                     | $\text{MoK}\alpha$ ( $\lambda = 0.71073$ )                   |
| $2\theta$ range for data collection/ $^\circ$ | 5.112 to 55.226                                              |
| Index ranges                                  | $-18 \leq h \leq 18, -12 \leq k \leq 12, -28 \leq l \leq 22$ |

|                                                |                                                                  |
|------------------------------------------------|------------------------------------------------------------------|
| Reflections collected                          | 16736                                                            |
| Independent reflections                        | 6460 [ $R_{\text{int}} = 0.0952$ , $R_{\text{sigma}} = 0.1130$ ] |
| Data/restraints/parameters                     | 6460/1/273                                                       |
| Goodness-of-fit on $F^2$                       | 0.836                                                            |
| Final R indexes [ $I \geq 2\sigma(I)$ ]        | $R_1 = 0.0555$ , $wR_2 = 0.1352$                                 |
| Final R indexes [all data]                     | $R_1 = 0.1132$ , $wR_2 = 0.1540$                                 |
| Largest diff. peak/hole / $e \text{ \AA}^{-3}$ | 0.22/-0.35                                                       |

**Table s2 Bond Lengths for 23c'.**

| Atom | Atom | Length/Å   | Atom | Atom | Length/Å |
|------|------|------------|------|------|----------|
| P1   | O1   | 1.4832(17) | C17  | C18  | 1.392(3) |
| P1   | C16  | 1.815(2)   | C12  | C11  | 1.387(3) |
| P1   | C17  | 1.801(2)   | C11  | C10  | 1.370(4) |
| P1   | C23  | 1.791(3)   | C11  | C14  | 1.510(3) |
| C1   | C16  | 1.490(3)   | C3   | C2   | 1.384(3) |
| C1   | C6   | 1.388(3)   | C23  | C28  | 1.390(3) |
| C1   | C2   | 1.390(3)   | C23  | C24  | 1.389(3) |
| C8   | C13  | 1.394(3)   | C22  | C21  | 1.368(3) |
| C8   | C15  | 1.464(3)   | C9   | C10  | 1.383(3) |
| C8   | C9   | 1.395(3)   | C28  | C27  | 1.386(4) |
| C16  | C15  | 1.341(3)   | C18  | C19  | 1.384(3) |
| C6   | C5   | 1.390(3)   | C19  | C20  | 1.357(4) |
| C13  | C12  | 1.374(3)   | C20  | C21  | 1.376(4) |
| C4   | C3   | 1.394(3)   | C27  | C26  | 1.386(4) |
| C4   | C5   | 1.374(3)   | C24  | C25  | 1.372(4) |
| C4   | C7   | 1.515(3)   | C26  | C25  | 1.369(4) |
| C17  | C22  | 1.390(3)   |      |      |          |

**Table s3 Bond Angles for 3c'.**

| Atom | Atom | Atom | Angle/°    | Atom | Atom | Atom | Angle/°    |
|------|------|------|------------|------|------|------|------------|
| O1   | P1   | C16  | 111.71(10) | C13  | C12  | C11  | 122.2(2)   |
| O1   | P1   | C17  | 110.72(10) | C12  | C11  | C14  | 120.8(3)   |
| O1   | P1   | C23  | 112.10(11) | C10  | C11  | C12  | 116.5(2)   |
| C17  | P1   | C16  | 108.43(10) | C10  | C11  | C14  | 122.7(3)   |
| C23  | P1   | C16  | 106.89(11) | C16  | C15  | C8   | 130.9(2)   |
| C23  | P1   | C17  | 106.76(11) | C2   | C3   | C4   | 121.2(2)   |
| C6   | C1   | C16  | 122.23(19) | C28  | C23  | P1   | 123.75(18) |
| C6   | C1   | C2   | 117.7(2)   | C24  | C23  | P1   | 118.4(2)   |
| C2   | C1   | C16  | 120.01(19) | C24  | C23  | C28  | 117.9(3)   |
| C13  | C8   | C15  | 125.4(2)   | C4   | C5   | C6   | 122.2(2)   |

|     |     |     |            |     |     |     |          |
|-----|-----|-----|------------|-----|-----|-----|----------|
| C13 | C8  | C9  | 116.6(2)   | C3  | C2  | C1  | 121.2(2) |
| C9  | C8  | C15 | 118.0(2)   | C21 | C22 | C17 | 121.6(2) |
| C1  | C16 | P1  | 117.83(16) | C10 | C9  | C8  | 120.9(2) |
| C15 | C16 | P1  | 115.67(17) | C27 | C28 | C23 | 120.9(3) |
| C15 | C16 | C1  | 126.1(2)   | C19 | C18 | C17 | 120.6(2) |
| C1  | C6  | C5  | 120.4(2)   | C11 | C10 | C9  | 122.4(2) |
| C12 | C13 | C8  | 121.2(2)   | C20 | C19 | C18 | 121.0(3) |
| C3  | C4  | C7  | 120.8(2)   | C19 | C20 | C21 | 119.3(3) |
| C5  | C4  | C3  | 117.2(2)   | C26 | C27 | C28 | 119.9(3) |
| C5  | C4  | C7  | 122.0(2)   | C25 | C24 | C23 | 121.1(3) |
| C22 | C17 | P1  | 120.76(18) | C22 | C21 | C20 | 120.4(3) |
| C22 | C17 | C18 | 117.1(2)   | C25 | C26 | C27 | 119.4(3) |
| C18 | C17 | P1  | 121.35(19) | C26 | C25 | C24 | 120.8(3) |

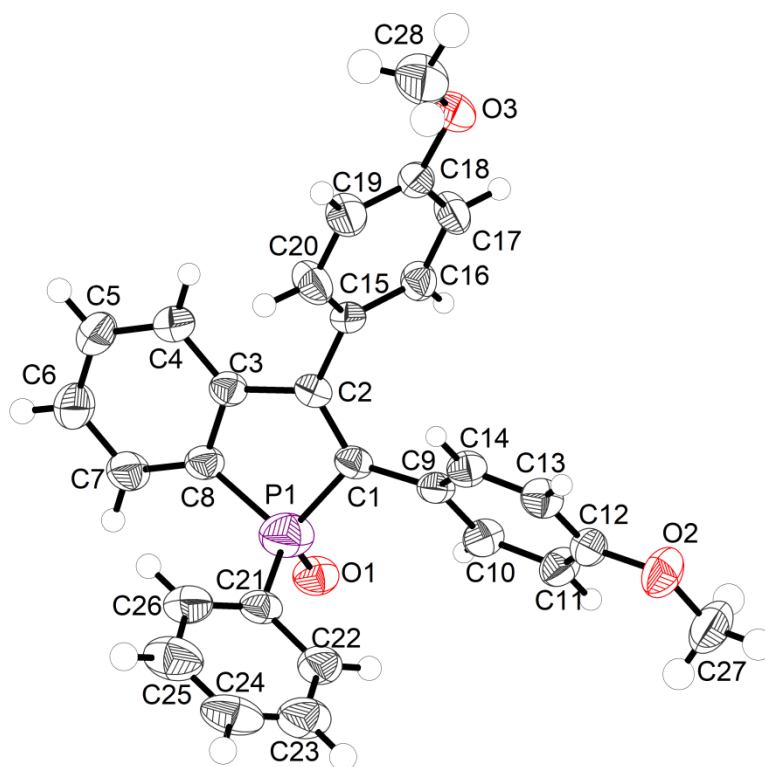

Figure s6. Crystal plot of compound **3j**. (The ellipsoid probability =50%). The single-crystal was obtained by slow volatilization in mixed solutions of CH<sub>2</sub>Cl<sub>2</sub>/n-hexane (1/5). CCDC 2300782.

**Table s4 Crystal data and structure refinement for 3j.**

|                     |                                                  |
|---------------------|--------------------------------------------------|
| Identification code | 221109HUANHY1_0m                                 |
| Empirical formula   | C <sub>28</sub> H <sub>23</sub> O <sub>3</sub> P |
| Formula weight      | 438.43                                           |

|                                             |                                                                |
|---------------------------------------------|----------------------------------------------------------------|
| Temperature/K                               | 296.15                                                         |
| Crystal system                              | orthorhombic                                                   |
| Space group                                 | Pca2 <sub>1</sub>                                              |
| a/Å                                         | 22.937(4)                                                      |
| b/Å                                         | 8.7952(15)                                                     |
| c/Å                                         | 11.1318(19)                                                    |
| $\alpha$ /°                                 | 90                                                             |
| $\beta$ /°                                  | 90                                                             |
| $\gamma$ /°                                 | 90                                                             |
| Volume/Å <sup>3</sup>                       | 2245.7(7)                                                      |
| Z                                           | 4                                                              |
| $\rho_{\text{calc}}$ /cm <sup>3</sup>       | 1.297                                                          |
| $\mu$ /mm <sup>-1</sup>                     | 0.150                                                          |
| F(000)                                      | 920.0                                                          |
| Crystal size/mm <sup>3</sup>                | 0.03 × 0.02 × 0.02                                             |
| Radiation                                   | MoK $\alpha$ ( $\lambda$ = 0.71073)                            |
| 2 $\Theta$ range for data collection/°      | 4.632 to 55.39                                                 |
| Index ranges                                | -29 ≤ h ≤ 21, -11 ≤ k ≤ 9, -14 ≤ l ≤ 13                        |
| Reflections collected                       | 13137                                                          |
| Independent reflections                     | 5008 [ $R_{\text{int}}$ = 0.0400, $R_{\text{sigma}}$ = 0.0452] |
| Data/restraints/parameters                  | 5008/1/291                                                     |
| Goodness-of-fit on F <sup>2</sup>           | 1.044                                                          |
| Final R indexes [ $I \geq 2\sigma(I)$ ]     | $R_1$ = 0.0421, $wR_2$ = 0.0963                                |
| Final R indexes [all data]                  | $R_1$ = 0.0562, $wR_2$ = 0.1046                                |
| Largest diff. peak/hole / e Å <sup>-3</sup> | 0.27/-0.23                                                     |
| Flack parameter                             | 0.09(5)                                                        |

**Table s5 Bond Lengths for 3j.**

| Atom | Atom | Length/Å | Atom | Atom | Length/Å |
|------|------|----------|------|------|----------|
| P1   | O1   | 1.481(2) | C3   | C4   | 1.380(5) |
| P1   | C1   | 1.818(3) | C10  | C11  | 1.388(4) |
| P1   | C21  | 1.802(3) | C14  | C13  | 1.377(4) |
| P1   | C8   | 1.792(3) | C21  | C26  | 1.376(5) |
| O2   | C12  | 1.368(4) | C21  | C22  | 1.399(5) |
| O2   | C27  | 1.433(5) | C8   | C7   | 1.377(4) |
| O3   | C18  | 1.373(4) | C15  | C2   | 1.484(4) |
| O3   | C28  | 1.414(5) | C15  | C20  | 1.388(4) |
| C9   | C1   | 1.478(4) | C17  | C18  | 1.387(5) |
| C9   | C10  | 1.385(4) | C18  | C19  | 1.375(5) |



|     |     |          |     |     |          |
|-----|-----|----------|-----|-----|----------|
| C9  | C14 | 1.402(4) | C7  | C6  | 1.382(5) |
| C16 | C15 | 1.386(4) | C4  | C5  | 1.393(5) |
| C16 | C17 | 1.376(4) | C26 | C25 | 1.390(5) |
| C12 | C11 | 1.373(4) | C20 | C19 | 1.386(4) |
| C12 | C13 | 1.386(5) | C5  | C6  | 1.373(5) |
| C1  | C2  | 1.358(4) | C22 | C23 | 1.383(5) |
| C3  | C8  | 1.408(4) | C24 | C23 | 1.360(7) |
| C3  | C2  | 1.489(4) | C24 | C25 | 1.374(7) |

**Table s6 Bond Angles for 3j.**

| Atom | Atom | Atom | Angle/°    | Atom | Atom | Atom | Angle/°  |
|------|------|------|------------|------|------|------|----------|
| O1   | P1   | C1   | 118.70(15) | C3   | C8   | P1   | 109.0(2) |
| O1   | P1   | C21  | 112.80(14) | C7   | C8   | P1   | 129.7(2) |
| O1   | P1   | C8   | 118.25(14) | C7   | C8   | C3   | 121.3(3) |
| C21  | P1   | C1   | 103.48(13) | C12  | C11  | C10  | 119.5(3) |
| C8   | P1   | C1   | 93.01(13)  | C16  | C15  | C2   | 120.3(3) |
| C8   | P1   | C21  | 108.15(16) | C16  | C15  | C20  | 117.6(3) |
| C12  | O2   | C27  | 117.9(3)   | C20  | C15  | C2   | 122.1(3) |
| C18  | O3   | C28  | 117.7(3)   | C16  | C17  | C18  | 119.9(3) |
| C10  | C9   | C1   | 119.5(2)   | C14  | C13  | C12  | 120.4(3) |
| C10  | C9   | C14  | 117.1(3)   | O3   | C18  | C17  | 115.9(3) |
| C14  | C9   | C1   | 123.2(3)   | O3   | C18  | C19  | 124.2(3) |
| C17  | C16  | C15  | 121.4(3)   | C19  | C18  | C17  | 119.9(3) |
| O2   | C12  | C11  | 124.4(3)   | C1   | C2   | C3   | 114.6(3) |
| O2   | C12  | C13  | 115.8(3)   | C1   | C2   | C15  | 125.0(3) |
| C11  | C12  | C13  | 119.8(3)   | C15  | C2   | C3   | 120.4(2) |
| C9   | C1   | P1   | 120.4(2)   | C8   | C7   | C6   | 119.1(3) |
| C2   | C1   | P1   | 109.6(2)   | C3   | C4   | C5   | 119.5(3) |
| C2   | C1   | C9   | 129.7(3)   | C21  | C26  | C25  | 120.9(4) |
| C8   | C3   | C2   | 113.6(3)   | C19  | C20  | C15  | 121.7(3) |
| C4   | C3   | C8   | 118.8(3)   | C6   | C5   | C4   | 121.0(3) |
| C4   | C3   | C2   | 127.6(3)   | C23  | C22  | C21  | 119.3(4) |
| C9   | C10  | C11  | 122.2(3)   | C5   | C6   | C7   | 120.3(3) |
| C13  | C14  | C9   | 121.1(3)   | C18  | C19  | C20  | 119.4(3) |
| C26  | C21  | P1   | 123.3(3)   | C23  | C24  | C25  | 119.5(4) |
| C26  | C21  | C22  | 118.7(3)   | C24  | C23  | C22  | 121.7(4) |
| C22  | C21  | P1   | 117.9(3)   | C24  | C25  | C26  | 119.9(4) |

## 9. Symbolic Z-matrix of the calculated structures.

**1a** with O<sub>2</sub>:

Charge =0 Multiplicity = 3

|   |             |             |             |
|---|-------------|-------------|-------------|
| O | 0.11989000  | -1.84801300 | 2.10533700  |
| P | 0.10857200  | -0.59892600 | 1.27547700  |
| C | 1.61424000  | -0.29737300 | 0.30089800  |
| C | 2.36508000  | -1.40146900 | -0.12319400 |
| C | 3.50782100  | -1.20886600 | -0.89865900 |
| C | 3.90579100  | 0.08342500  | -1.25006400 |
| C | 3.16748200  | 1.18708800  | -0.81745300 |
| C | 2.02578400  | 0.99888100  | -0.03758400 |
| C | -1.28892200 | -0.53998700 | 0.10213800  |
| C | -1.33975000 | 0.33826300  | -0.98933700 |
| C | -2.45365700 | 0.34432100  | -1.82813900 |
| C | -3.51684600 | -0.52898100 | -1.58550800 |
| C | -3.46467000 | -1.41273500 | -0.50602200 |
| C | -2.35321100 | -1.42010100 | 0.33760100  |
| H | 2.05532900  | -2.39929100 | 0.17299300  |
| H | 4.09115500  | -2.06479100 | -1.22476800 |
| H | 4.79670600  | 0.23113200  | -1.85341700 |
| H | 3.48553400  | 2.19201400  | -1.07887200 |
| H | 1.46403000  | 1.86127500  | 0.31268200  |
| H | -0.50777900 | 1.00461300  | -1.19560000 |
| H | -2.48940900 | 1.02450100  | -2.67400400 |
| H | -4.38205500 | -0.52412800 | -2.24213200 |
| H | -4.28716300 | -2.09774600 | -0.32261900 |
| H | -2.28925000 | -2.10959500 | 1.17383000  |
| H | -0.00771800 | 0.62056900  | 1.99542200  |
| O | -0.61978900 | 3.08217500  | 1.29857700  |
| O | -1.57170300 | 3.06465600  | 0.54311900  |

resonant ( $\lambda^3$ ) **1a** with O<sub>2</sub>:

Charge =0 Multiplicity = 3

|   |             |             |             |
|---|-------------|-------------|-------------|
| O | 0.03903600  | 2.11017100  | 0.49971700  |
| P | -0.11717300 | 1.01890900  | -0.77583300 |
| O | 2.97639100  | 2.53028600  | -0.30949300 |
| O | 3.52290100  | 1.54555900  | 0.14584100  |
| C | 0.97100200  | -0.36036800 | -0.20663200 |
| C | 1.21954100  | -0.58981900 | 1.15496200  |
| C | 2.05661400  | -1.63113300 | 1.54959000  |
| C | 2.64615100  | -2.46048600 | 0.58988800  |
| C | 2.40534900  | -2.23790300 | -0.76585200 |
| C | 1.57938300  | -1.18297400 | -1.16281600 |
| C | -1.75934700 | 0.32996500  | -0.29508500 |

|   |             |             |             |
|---|-------------|-------------|-------------|
| C | -2.12343100 | -0.96539700 | -0.69398600 |
| C | -3.39505800 | -1.46128800 | -0.41122600 |
| C | -4.32008100 | -0.67084300 | 0.27498500  |
| C | -3.96487500 | 0.61787100  | 0.67523200  |
| C | -2.69457000 | 1.12027400  | 0.38727900  |
| H | 0.76069900  | 0.06051000  | 1.89355800  |
| H | 2.24834200  | -1.80172300 | 2.60531200  |
| H | 3.29618200  | -3.27353700 | 0.90023000  |
| H | 2.86914800  | -2.87452800 | -1.51390000 |
| H | 1.41422400  | -0.99522700 | -2.22130900 |
| H | -1.40420800 | -1.59717600 | -1.20883600 |
| H | -3.66134400 | -2.46849900 | -0.71911600 |
| H | -5.30970000 | -1.05885200 | 0.49816000  |
| H | -4.67725500 | 1.23552300  | 1.21517300  |
| H | -2.41617500 | 2.11800300  | 0.70969700  |
| H | 0.60698900  | 2.83633000  | 0.21197100  |

**int-1:**

Charge =0 Multiplicity = 2

|   |             |             |             |
|---|-------------|-------------|-------------|
| O | -0.08794100 | 2.58757100  | -0.09534200 |
| P | -0.04031200 | 1.18658400  | -0.67592300 |
| C | 1.48031700  | 0.28068900  | -0.23916200 |
| C | 2.30495800  | 0.81119400  | 0.76529100  |
| C | 3.49072200  | 0.16194000  | 1.10538100  |
| C | 3.86691500  | -1.00829800 | 0.44138900  |
| C | 3.06149900  | -1.52535000 | -0.57605900 |
| C | 1.87716500  | -0.87770800 | -0.92580900 |
| C | -1.48202800 | 0.17936500  | -0.18722400 |
| C | -1.47140800 | -1.22315500 | -0.13379400 |
| C | -2.63490200 | -1.91619800 | 0.19764400  |
| C | -3.81511800 | -1.22098100 | 0.47071500  |
| C | -3.82960600 | 0.17506500  | 0.41792500  |
| C | -2.67165900 | 0.87504200  | 0.08600600  |
| H | 2.00656700  | 1.72672800  | 1.26594600  |
| H | 4.12252900  | 0.56932300  | 1.88921400  |
| H | 4.79169700  | -1.51096100 | 0.70869200  |
| H | 3.36173300  | -2.42505500 | -1.10491000 |
| H | 1.27125100  | -1.26788900 | -1.73926500 |
| H | -0.55626300 | -1.77397700 | -0.32206500 |
| H | -2.61774500 | -3.00094300 | 0.24931900  |
| H | -4.71909600 | -1.76529400 | 0.72741600  |
| H | -4.74325200 | 0.71900200  | 0.63895600  |
| H | -2.67034300 | 1.96011200  | 0.05447300  |

**int-1 with HOO- :**

Charge =0 Multiplicity = 3

|   |             |             |             |
|---|-------------|-------------|-------------|
| O | -0.07577700 | 1.88394000  | -0.95837500 |
| P | 0.02852800  | 0.80895500  | 0.13902700  |
| O | -1.45594600 | 3.60429100  | 0.24064700  |
| O | -1.54492100 | 2.85880200  | 1.32401900  |
| C | -1.28666500 | -0.43585700 | -0.01386300 |
| C | -2.04782100 | -0.46570000 | -1.19228900 |
| C | -3.07634000 | -1.39658000 | -1.32869900 |
| C | -3.35659900 | -2.29068200 | -0.29256000 |
| C | -2.61502200 | -2.24752000 | 0.89047700  |
| C | -1.58925000 | -1.31482900 | 1.03724300  |
| C | 1.64581800  | -0.01968000 | 0.04090100  |
| C | 1.86769300  | -1.31806200 | 0.52773500  |
| C | 3.14641300  | -1.86964800 | 0.47754400  |
| C | 4.21090500  | -1.13213200 | -0.04674600 |
| C | 3.99396400  | 0.16148200  | -0.52797800 |
| C | 2.71943200  | 0.72187100  | -0.48044700 |
| H | -1.82533900 | 0.24013800  | -1.98601900 |
| H | -3.66042000 | -1.42401400 | -2.24379200 |
| H | -4.15971500 | -3.01332600 | -0.40207300 |
| H | -2.84478800 | -2.93001400 | 1.70311100  |
| H | -1.03809100 | -1.26226500 | 1.97225300  |
| H | 1.04437900  | -1.90632600 | 0.91902100  |
| H | 3.31100400  | -2.87904900 | 0.84267800  |
| H | 5.20585700  | -1.56567500 | -0.08242600 |
| H | 4.81826800  | 0.73331100  | -0.94362800 |
| H | 2.53908100  | 1.72140600  | -0.86262400 |
| H | -0.88017500 | 3.01924600  | -0.40013800 |

**int-1 with 2a:**

Charge =0 Multiplicity = 2

|   |             |            |             |
|---|-------------|------------|-------------|
| O | 0.22745000  | 2.38716600 | 1.31456400  |
| P | -0.47618900 | 1.27473400 | 0.55721200  |
| C | -2.28028700 | 1.48783900 | 0.43661700  |
| C | -2.83953800 | 2.72727900 | 0.78489600  |
| C | -4.22232600 | 2.90035500 | 0.74413700  |
| C | -5.05294600 | 1.84011400 | 0.37148100  |
| C | -4.49977200 | 0.59835600 | 0.04981700  |
| C | -3.11857200 | 0.41496200 | 0.09233500  |
| C | 0.20548200  | 1.02012900 | -1.11274700 |
| C | -0.47522900 | 0.33081500 | -2.12856500 |
| C | 0.15944400  | 0.07576200 | -3.34333900 |
| C | 1.47534200  | 0.49586000 | -3.55277300 |

|   |             |             |             |
|---|-------------|-------------|-------------|
| C | 2.15379800  | 1.18599200  | -2.54570000 |
| C | 1.52532700  | 1.44796300  | -1.33044600 |
| H | -2.18452400 | 3.53924600  | 1.08468200  |
| H | -4.65309200 | 3.86298200  | 1.00414200  |
| H | -6.12983400 | 1.97874900  | 0.34303500  |
| H | -5.14254200 | -0.23442400 | -0.22031400 |
| H | -2.70154900 | -0.56287500 | -0.12285600 |
| H | -1.49744100 | 0.00239900  | -1.98099400 |
| H | -0.37609400 | -0.44988600 | -4.12889700 |
| H | 1.96777500  | 0.28870800  | -4.49841900 |
| H | 3.17560400  | 1.51789200  | -2.70394100 |
| H | 2.04887200  | 1.97774600  | -0.54259900 |
| C | 3.17620000  | -0.69869200 | 0.89197200  |
| C | 3.25137400  | 0.53365200  | 1.57315700  |
| C | 4.46353900  | 1.21529000  | 1.64537400  |
| C | 5.61107800  | 0.68398200  | 1.05085600  |
| C | 5.54259900  | -0.53681600 | 0.37479800  |
| C | 4.33550000  | -1.22582900 | 0.29206400  |
| H | 2.35407300  | 0.96312600  | 2.00666800  |
| H | 4.50933600  | 2.16824200  | 2.16393700  |
| H | 6.55368800  | 1.21998300  | 1.11131500  |
| H | 6.43160100  | -0.95185900 | -0.09101700 |
| H | 4.27475600  | -2.17129800 | -0.23703500 |
| C | 1.92689700  | -1.37566000 | 0.78136300  |
| C | 0.83014200  | -1.88806000 | 0.67282000  |
| C | -0.48710100 | -2.40600400 | 0.50839400  |
| C | -1.37201100 | -2.47659300 | 1.60307800  |
| C | -0.94070900 | -2.81225500 | -0.76291400 |
| C | -2.67149800 | -2.94578500 | 1.42846300  |
| H | -1.02877500 | -2.15332700 | 2.57998600  |
| C | -2.24370700 | -3.27688500 | -0.92825200 |
| H | -0.26707400 | -2.73837600 | -1.60956100 |
| C | -3.11244100 | -3.34773500 | 0.16475600  |
| H | -3.34460900 | -2.99018200 | 2.27916300  |
| H | -2.58323000 | -3.58290000 | -1.91345200 |
| H | -4.12721100 | -3.71048500 | 0.03161800  |

**int-2:**

Charge =0 Multiplicity = 2

|   |             |            |             |
|---|-------------|------------|-------------|
| O | -1.05531700 | 0.91795000 | 2.42554900  |
| P | -0.56681700 | 0.76304300 | 1.00978700  |
| C | -1.61228600 | 1.63089700 | -0.20720500 |
| C | -2.40584600 | 2.68638600 | 0.26080900  |
| C | -3.21309700 | 3.39791000 | -0.62663900 |

|   |             |             |             |
|---|-------------|-------------|-------------|
| C | -3.23499700 | 3.05614600  | -1.98054300 |
| C | -2.45555500 | 1.99554700  | -2.44848900 |
| C | -1.64891500 | 1.28009700  | -1.56409300 |
| C | 1.13801300  | 1.37315800  | 0.80260200  |
| C | 1.66877300  | 1.78312800  | -0.42677700 |
| C | 3.00925300  | 2.15351200  | -0.51871900 |
| C | 3.82280300  | 2.12353100  | 0.61597200  |
| C | 3.29186800  | 1.73606200  | 1.84764200  |
| C | 1.95149100  | 1.36339800  | 1.94354400  |
| H | -2.39189600 | 2.92691300  | 1.31938900  |
| H | -3.82872200 | 4.21469700  | -0.26157000 |
| H | -3.86630700 | 3.60940800  | -2.66980500 |
| H | -2.48445300 | 1.71991500  | -3.49856200 |
| H | -1.06274600 | 0.43902300  | -1.92319500 |
| H | 1.04057900  | 1.80829400  | -1.31160100 |
| H | 3.42025700  | 2.46045400  | -1.47572400 |
| H | 4.86852100  | 2.40698700  | 0.54018900  |
| H | 3.92138000  | 1.72331700  | 2.73250100  |
| H | 1.52072300  | 1.06820600  | 2.89524800  |
| C | 1.95137500  | -1.58037700 | -0.41244200 |
| C | 2.94384100  | -1.93188300 | 0.55335100  |
| C | 4.27250900  | -2.04886800 | 0.18059000  |
| C | 4.66645600  | -1.83375100 | -1.14787200 |
| C | 3.70461100  | -1.49682800 | -2.11126400 |
| C | 2.37023700  | -1.37340300 | -1.76322900 |
| H | 2.63901100  | -2.08475100 | 1.58282200  |
| H | 5.01596100  | -2.30457500 | 0.92998600  |
| H | 5.71045500  | -1.92815000 | -1.42936800 |
| H | 4.00648100  | -1.32843000 | -3.14106100 |
| H | 1.62593900  | -1.10851700 | -2.50733900 |
| C | 0.62355700  | -1.45302300 | -0.05580000 |
| C | -0.52068200 | -0.99107800 | 0.38696700  |
| C | -1.79949100 | -1.76120000 | 0.37480800  |
| C | -2.80168100 | -1.53562700 | 1.33220100  |
| C | -2.01604200 | -2.72803200 | -0.62125300 |
| C | -3.98912400 | -2.26701400 | 1.28805900  |
| H | -2.64209300 | -0.79702000 | 2.11046300  |
| C | -3.20105000 | -3.45753500 | -0.65732400 |
| H | -1.24602500 | -2.89587000 | -1.36884600 |
| C | -4.19475700 | -3.22805100 | 0.29790700  |
| H | -4.75485600 | -2.08483200 | 2.03653600  |
| H | -3.35303500 | -4.20004700 | -1.43558400 |
| H | -5.12196900 | -3.79287000 | 0.26749000  |

**3a:**

Charge =0 Multiplicity = 1

|   |             |             |             |
|---|-------------|-------------|-------------|
| O | -2.00521900 | 0.05775200  | 2.40986100  |
| P | -1.42831100 | 0.38925500  | 1.06133100  |
| C | -2.55392400 | -0.04498300 | -0.30541600 |
| C | -3.80414100 | -0.58147400 | 0.02067500  |
| C | -4.69425600 | -0.93695700 | -0.99466100 |
| C | -4.33640000 | -0.75863200 | -2.33155800 |
| C | -3.08601500 | -0.22487500 | -2.65909400 |
| C | -2.19509300 | 0.13081400  | -1.64929000 |
| C | -0.83347800 | 2.08072200  | 0.76118800  |
| C | -1.49413800 | 3.28813900  | 0.93707400  |
| C | -0.81005800 | 4.48233800  | 0.67306200  |
| C | 0.51865200  | 4.44479600  | 0.24901300  |
| C | 1.18701500  | 3.22653100  | 0.07877200  |
| C | 0.50815200  | 2.03238000  | 0.32942800  |
| H | -4.06024400 | -0.71734900 | 1.06688800  |
| H | -5.66428300 | -1.35449100 | -0.74132700 |
| H | -5.02901200 | -1.03704800 | -3.12063500 |
| H | -2.80758000 | -0.08970300 | -3.70011800 |
| H | -1.22068200 | 0.54032300  | -1.90162900 |
| H | -2.52399300 | 3.30692600  | 1.28147500  |
| H | -1.31197300 | 5.43584400  | 0.80552700  |
| H | 1.04766200  | 5.37315700  | 0.05416300  |
| H | 2.22450600  | 3.21255700  | -0.23662600 |
| C | 2.46768400  | 0.43169400  | -0.19132600 |
| C | 2.93497200  | 0.91407600  | -1.42415800 |
| C | 4.25203200  | 0.68415100  | -1.82256800 |
| C | 5.12221900  | -0.02179900 | -0.99026200 |
| C | 4.66777300  | -0.49997300 | 0.24117000  |
| C | 3.35085200  | -0.27774900 | 0.63709900  |
| H | 2.25678100  | 1.45808800  | -2.07505800 |
| H | 4.59698600  | 1.05567900  | -2.78306100 |
| H | 6.14838500  | -0.19814000 | -1.29870700 |
| H | 5.34014500  | -1.04863800 | 0.89397100  |
| H | 2.99088700  | -0.65686800 | 1.58786500  |
| C | 1.06199700  | 0.65181000  | 0.22915500  |
| C | 0.19318500  | -0.33421700 | 0.58888200  |
| C | 0.37247700  | -1.79478600 | 0.54529000  |
| C | -0.21683400 | -2.59695800 | 1.54121100  |
| C | 1.07955500  | -2.42385300 | -0.49638000 |
| C | -0.07790900 | -3.98349600 | 1.50587600  |
| H | -0.78075000 | -2.12260600 | 2.33850600  |
| C | 1.21086900  | -3.80909800 | -0.52813000 |

|   |             |             |             |
|---|-------------|-------------|-------------|
| H | 1.51797000  | -1.82074100 | -1.28354800 |
| C | 0.63742100  | -4.59487400 | 0.47514900  |
| H | -0.53296100 | -4.58690600 | 2.28590100  |
| H | 1.75709000  | -4.27764100 | -1.34176800 |
| H | 0.74183200  | -5.67563700 | 0.44813000  |

**ts-1:**

Charge =0 Multiplicity = 3

|   |             |             |             |
|---|-------------|-------------|-------------|
| O | -0.01380400 | 1.83148100  | 1.02438000  |
| P | -0.02594100 | 0.80301300  | -0.14042500 |
| O | 0.62935000  | 3.80262500  | -0.22738000 |
| O | 0.71139300  | 3.15102000  | -1.35680400 |
| C | 1.40116800  | -0.31728900 | -0.00110100 |
| C | 2.14716100  | -0.32105000 | 1.18756100  |
| C | 3.25328500  | -1.16071600 | 1.30835200  |
| C | 3.62522700  | -1.99035200 | 0.24758300  |
| C | 2.89733700  | -1.97245500 | -0.94447700 |
| C | 1.79454700  | -1.12946300 | -1.07582200 |
| C | -1.55250400 | -0.18357700 | -0.02994000 |
| C | -1.66679400 | -1.46487300 | -0.59278600 |
| C | -2.88187300 | -2.14436700 | -0.53389700 |
| C | -3.99105200 | -1.55118800 | 0.07439000  |
| C | -3.88165500 | -0.27455500 | 0.63084400  |
| C | -2.67069600 | 0.41262300  | 0.57602800  |
| H | 1.85168100  | 0.33354900  | 2.00105700  |
| H | 3.82585200  | -1.16812500 | 2.23113000  |
| H | 4.48820600  | -2.64222200 | 0.34546200  |
| H | 3.19667600  | -2.60383400 | -1.77561400 |
| H | 1.25248300  | -1.09381400 | -2.01704800 |
| H | -0.80716100 | -1.94185300 | -1.05209700 |
| H | -2.96176600 | -3.14057700 | -0.95879000 |
| H | -4.93651400 | -2.08363000 | 0.11641700  |
| H | -4.73994100 | 0.18540500  | 1.11157300  |
| H | -2.57346300 | 1.39922500  | 1.01714400  |
| H | 0.33265700  | 3.01324100  | 0.48514600  |

**ts-1':**

Charge =0 Multiplicity = 3

|   |            |             |             |
|---|------------|-------------|-------------|
| O | 0.11989000 | -1.84801300 | 2.10533700  |
| P | 0.10857200 | -0.59892600 | 1.27547700  |
| C | 1.61424000 | -0.29737300 | 0.30089800  |
| C | 2.36508000 | -1.40146900 | -0.12319400 |
| C | 3.50782100 | -1.20886600 | -0.89865900 |
| C | 3.90579100 | 0.08342500  | -1.25006400 |



|   |             |             |             |
|---|-------------|-------------|-------------|
| C | 3.16748200  | 1.18708800  | -0.81745300 |
| C | 2.02578400  | 0.99888100  | -0.03758400 |
| C | -1.28892200 | -0.53998700 | 0.10213800  |
| C | -1.33975000 | 0.33826300  | -0.98933700 |
| C | -2.45365700 | 0.34432100  | -1.82813900 |
| C | -3.51684600 | -0.52898100 | -1.58550800 |
| C | -3.46467000 | -1.41273500 | -0.50602200 |
| C | -2.35321100 | -1.42010100 | 0.33760100  |
| H | 2.05532900  | -2.39929100 | 0.17299300  |
| H | 4.09115500  | -2.06479100 | -1.22476800 |
| H | 4.79670600  | 0.23113200  | -1.85341700 |
| H | 3.48553400  | 2.19201400  | -1.07887200 |
| H | 1.46403000  | 1.86127500  | 0.31268200  |
| H | -0.50777900 | 1.00461300  | -1.19560000 |
| H | -2.48940900 | 1.02450100  | -2.67400400 |
| H | -4.38205500 | -0.52412800 | -2.24213200 |
| H | -4.28716300 | -2.09774600 | -0.32261900 |
| H | -2.28925000 | -2.10959500 | 1.17383000  |
| H | -0.00771800 | 0.62056900  | 1.99542200  |
| O | -0.61978900 | 3.08217500  | 1.29857700  |
| O | -1.57170300 | 3.06465600  | 0.54311900  |

**ts-2:**

Charge =0 Multiplicity = 2

|   |             |             |             |
|---|-------------|-------------|-------------|
| O | 0.41998400  | -0.75052100 | -2.18651400 |
| P | -0.20300300 | -0.67529700 | -0.81056600 |
| C | -1.95434800 | -1.16987900 | -0.77781700 |
| C | -2.48632600 | -1.75358400 | -1.93914000 |
| C | -3.83814800 | -2.08939500 | -1.99416000 |
| C | -4.67090600 | -1.83233900 | -0.90208000 |
| C | -4.15151400 | -1.22741700 | 0.24501700  |
| C | -2.80163900 | -0.88670000 | 0.30658900  |
| C | 0.71630900  | -1.62229900 | 0.43991100  |
| C | 0.14677800  | -2.10963800 | 1.62684700  |
| C | 0.94832500  | -2.73643200 | 2.57941600  |
| C | 2.32209300  | -2.87431400 | 2.36342500  |
| C | 2.89212300  | -2.39460100 | 1.18245200  |
| C | 2.09630500  | -1.77223600 | 0.22257800  |
| H | -1.83043600 | -1.93374500 | -2.78502100 |
| H | -4.24311400 | -2.55070500 | -2.89033800 |
| H | -5.72473900 | -2.09106600 | -0.94956600 |
| H | -4.80082300 | -1.00303700 | 1.08603700  |
| H | -2.42091600 | -0.36985200 | 1.18161500  |
| H | -0.92035900 | -2.02218100 | 1.79984200  |

|   |             |             |             |
|---|-------------|-------------|-------------|
| H | 0.49924200  | -3.12184900 | 3.49035300  |
| H | 2.94346000  | -3.35827700 | 3.11141800  |
| H | 3.95838100  | -2.50180400 | 1.00643100  |
| H | 2.53310700  | -1.40276000 | -0.69855900 |
| C | 2.73420500  | 1.50855800  | -0.35524700 |
| C | 3.10168100  | 1.19528800  | -1.68484700 |
| C | 4.42291300  | 0.87961700  | -1.98265200 |
| C | 5.39592600  | 0.87602600  | -0.97761600 |
| C | 5.03994000  | 1.18850000  | 0.33855000  |
| C | 3.72309500  | 1.50415800  | 0.65287800  |
| H | 2.33035900  | 1.15060700  | -2.44523600 |
| H | 4.69451500  | 0.62474900  | -3.00270900 |
| H | 6.42544300  | 0.62791700  | -1.21792100 |
| H | 5.79272700  | 1.18228400  | 1.12133800  |
| H | 3.43858300  | 1.73623000  | 1.67385700  |
| C | 1.37955800  | 1.77005700  | -0.04628400 |
| C | 0.14874500  | 1.65946000  | 0.06342200  |
| C | -1.17629000 | 2.10382400  | 0.42258600  |
| C | -2.16331700 | 2.30017900  | -0.55925800 |
| C | -1.50965300 | 2.29062000  | 1.77666900  |
| C | -3.45113500 | 2.68130000  | -0.19311300 |
| H | -1.91228600 | 2.13544600  | -1.60192300 |
| C | -2.80252400 | 2.66761600  | 2.13510000  |
| H | -0.74891500 | 2.13173700  | 2.53409900  |
| C | -3.77704000 | 2.86250600  | 1.15313700  |
| H | -4.20565700 | 2.82603200  | -0.96025100 |
| H | -3.04957000 | 2.80884300  | 3.18328800  |
| H | -4.78477400 | 3.15180600  | 1.43568800  |
